# Supplementary material for: Dissecting microregulation of a master regulatory network
Source: PubMed Central journal article supplement (PMC2289817; doi:10.1186/1471-2164-9-88), 2008-02-23

# Additional File 1: Systematic break-down of the putative p53-regulated miRNAs (*p53-miRs*)

*miRNAs registry 9.2; May 2007; NCBI-36*

**227**

**319 p53 sites**

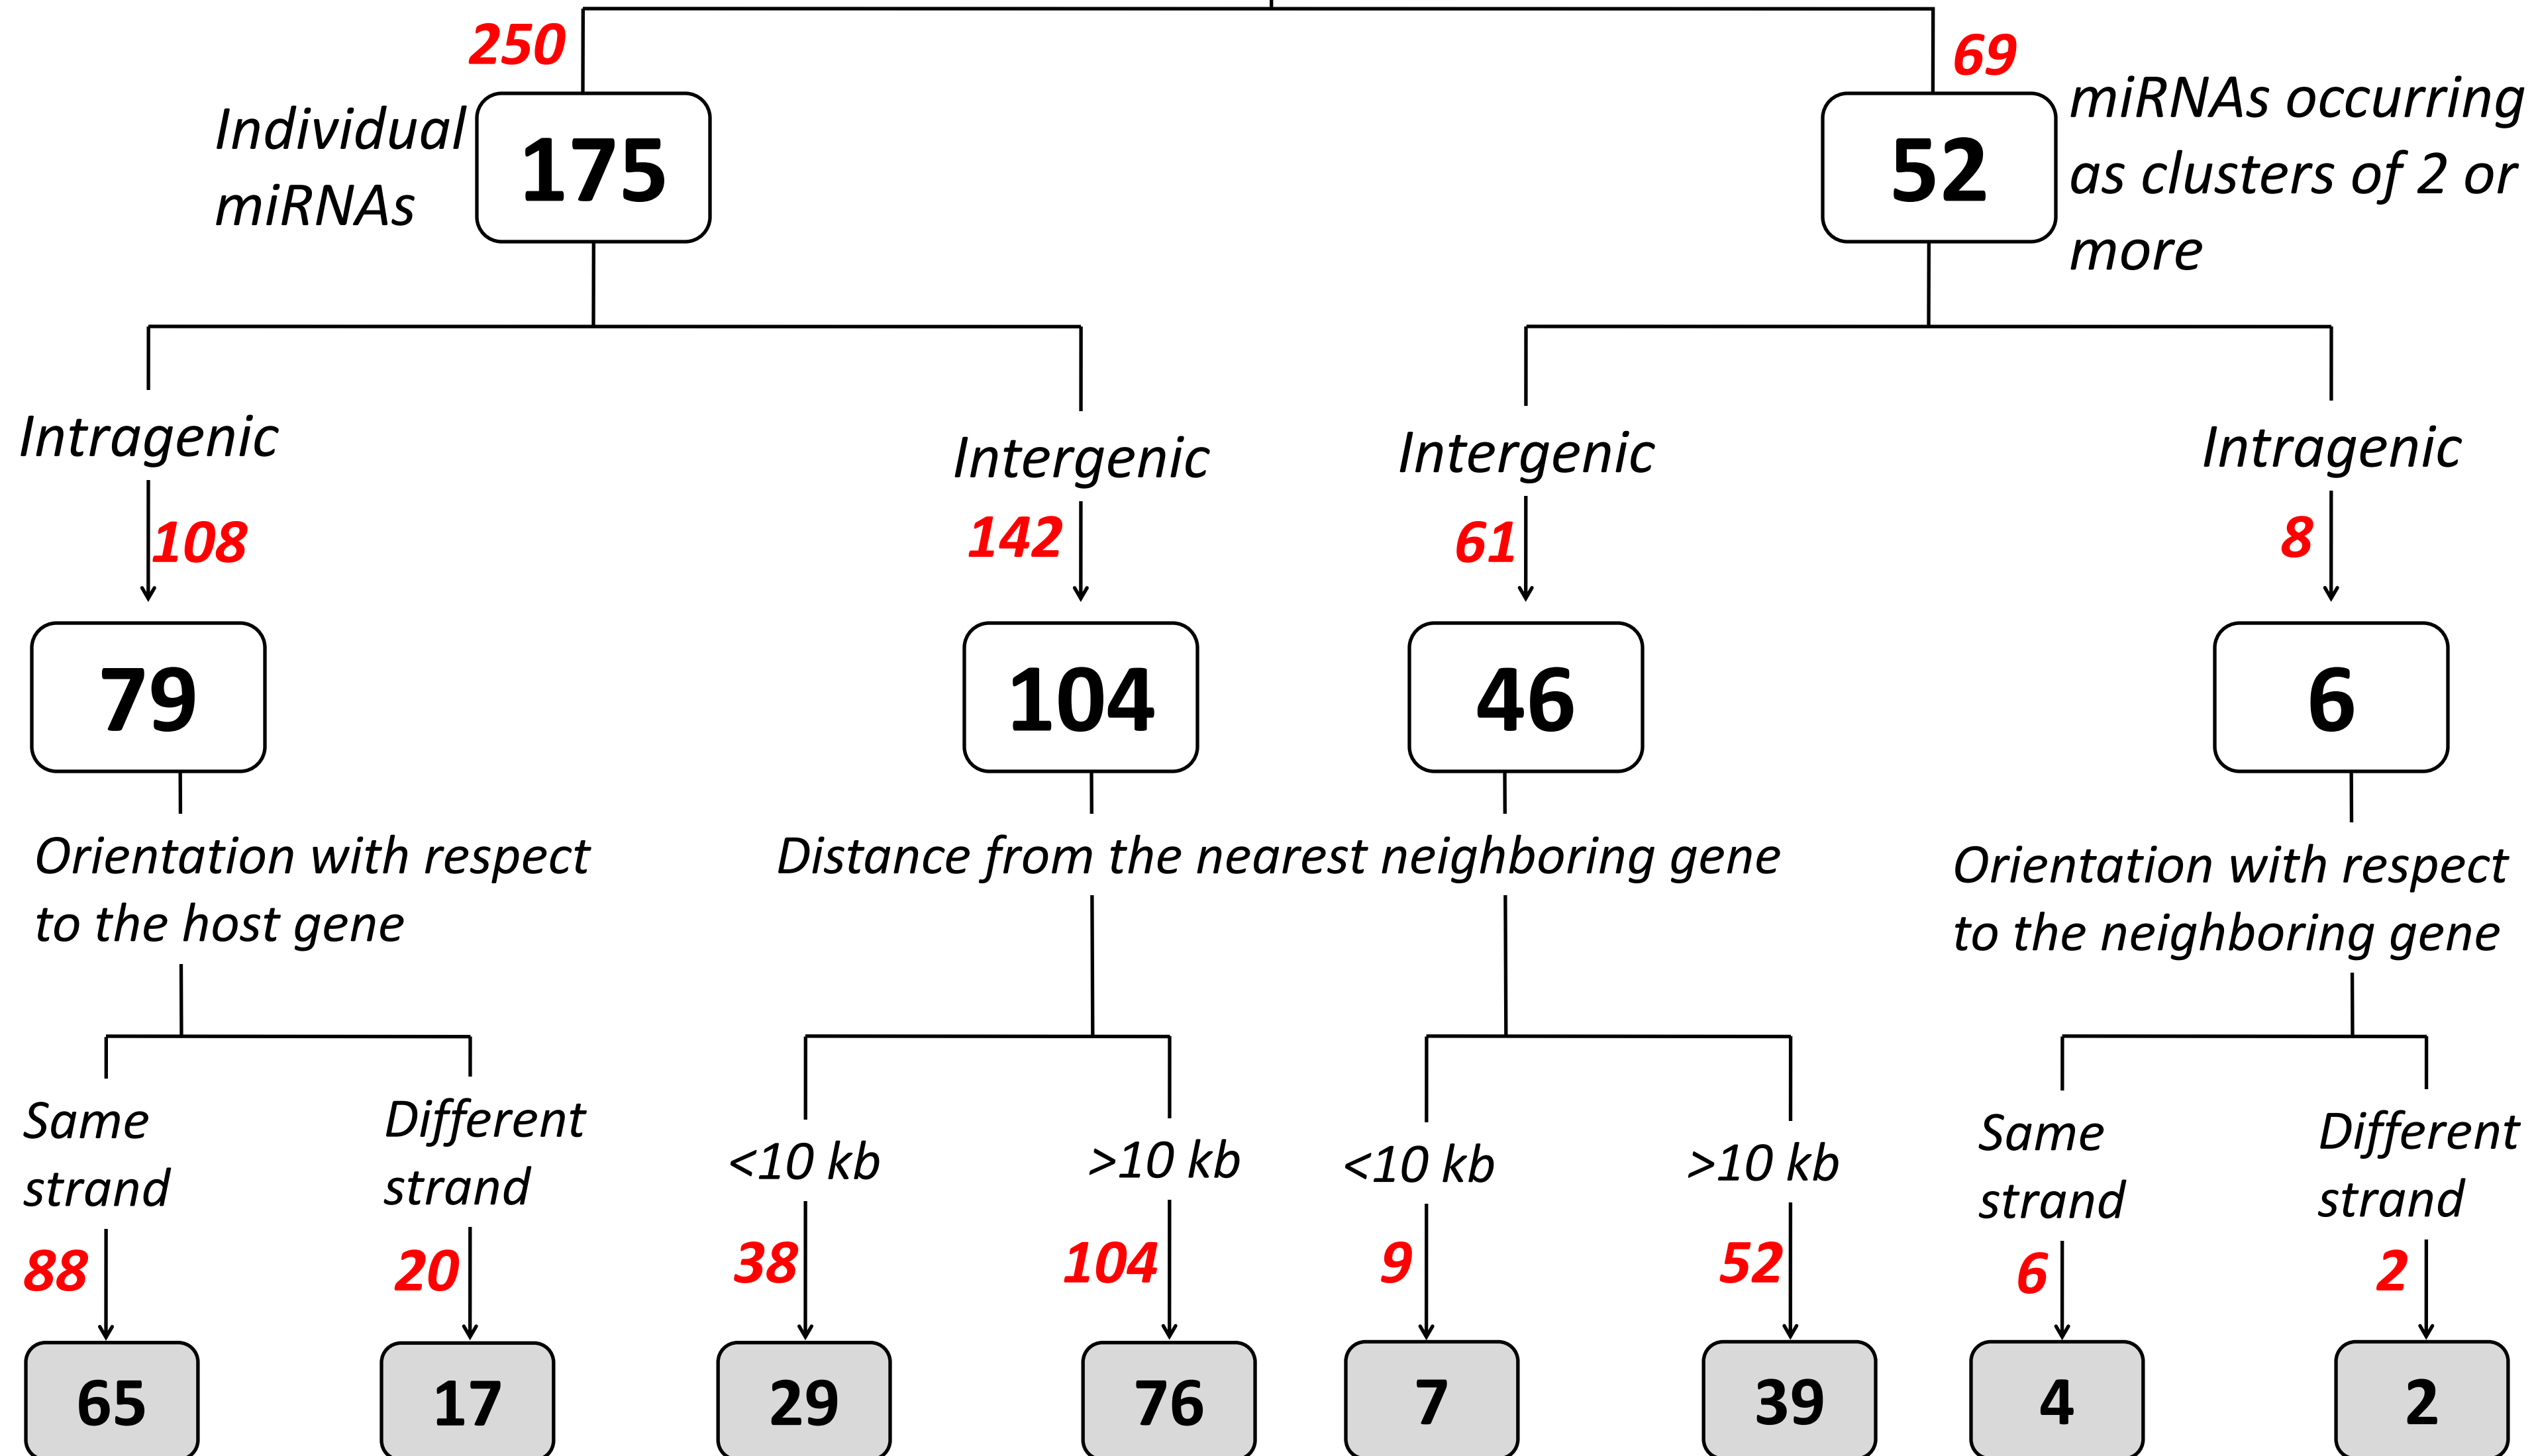

Supplement: 1471-2164-9-88-S1.pdf [file 1471-2164-9-88-S1.pdf]
