# Supplementary material for: Dissecting microregulation of a master regulatory network
Source: PubMed Central journal article supplement (PMC2289817; doi:10.1186/1471-2164-9-88), 2008-02-23
Supplement: 1471-2164-9-88-S2.pdf [file 1471-2164-9-88-S2.pdf]

**Additional File 2:** Chromosome coordinates (based on Human Mar. 2006 - hg18 - assembly) of putative p53 sites in the flanking 10 kb regions of human microRNAs. The start and end positions refer to the start and end of dimer 1 and dimer 2 respectively. The column "Spacer" (set to a maximum of 4 bp) indicates the number of base pairs between the two dimers.

| chr   | Start     | End       | miRNA          | Strand | Spacer Length | p53 Response Element       |  Dimer-1 (10 bp) | Spacer<br>0 - 4 bp |  Dimer-2 (10 bp) |
|-------|-----------|-----------|----------------|--------|---------------|----------------------------|-----------------------------------------------------------------------------------------------------|--------------------|-----------------------------------------------------------------------------------------------------|
| chr1  | 100521828 | 100521851 | hsa-mir-553    | +      | 4             | AGTCAAGATTCACAAAACATGTTT   | AGTCAAGATT                                                                                          | CACA               | AAACATGTTT                                                                                          |
| chr1  | 155164697 | 155164720 | hsa-mir-765    | -      | 4             | CAGCTTGTAACCTTGGGCATGTTA   | CAGCTTGTA                                                                                           | CCTT               | GGGCATGTTA                                                                                          |
| chr10 | 76973718  | 76973741  | hsa-mir-606    | +      | 4             | TGGCTTGTGCTTCTGGCATGTTT    | TGGCTTGTGC                                                                                          | TTTC               | TGGCATGTTT                                                                                          |
| chr10 | 91348592  | 91348615  | hsa-mir-107    | -      | 4             | AAGCAAGTCACTCCGAGCTAGGCA   | AAGCAAGTCA                                                                                          | CTCC               | GAGCTAGGCA                                                                                          |
| chr10 | 98586117  | 98586140  | hsa-mir-607    | -      | 4             | TCACTTGCCGTGATAGAAGCTTGCCA | TCACTTGCC                                                                                           | GATA               | GAAGCTTGCCA                                                                                         |
| chr11 | 121482825 | 121482848 | hsa-mir-125b-1 | -      | 4             | CAGCTAGTCTCCTCAAACATGTTT   | CAGCTAGTCT                                                                                          | CCTC               | AAACATGTTT                                                                                          |
| chr12 | 12963453  | 12963476  | hsa-mir-614    | +      | 4             | TGACAAGCCCATGTAGCCATGCTG   | TGACAAGCCC                                                                                          | ATGT               | AGCCATGCTG                                                                                          |
| chr12 | 63308685  | 63308708  | hsa-mir-548c   | +      | 4             | AGGCATGCACCACCACTTGCCCT    | AGGCATGCAC                                                                                          | CACC               | ACACTTGCCCT                                                                                         |
| chr12 | 96478916  | 96478939  | hsa-mir-135a-2 | +      | 4             | CAGCAAGTGCCAAGGGGCTAGTTG   | CAGCAAGTGC                                                                                          | CAAG               | GGGCTAGTTG                                                                                          |
| chr13 | 98806354  | 98806377  | hsa-mir-623    | +      | 4             | AAACAAGACTTGGGACACATGTCT   | AAACAAGACT                                                                                          | TGGG               | ACACATGTCT                                                                                          |
| chr17 | 44018101  | 44018124  | hsa-mir-10a    | -      | 4             | ATGCATGCACCTAAGGACAAGCCT   | ATGCATGCAC                                                                                          | CTAA               | GGACAAGCCT                                                                                          |
| chr17 | 62214899  | 62214922  | hsa-mir-634    | +      | 4             | GGGCAAGTCGGAAATTAACATGTCG  | GGGCAAGTCG                                                                                          | GAAT               | TAACATGTCG                                                                                          |
| chr17 | 63930570  | 63930593  | hsa-mir-635    | -      | 4             | AGACTTGTACAGGTTGGCTTGTTT   | AGACTTGTAC                                                                                          | AGGT               | TGGCTTGTTT                                                                                          |
| chr18 | 54279298  | 54279321  | hsa-mir-122a   | +      | 4             | CAGCTTGCTTATCTAGGCTTGCCAG  | CAGCTTGCTT                                                                                          | ATCT               | AGGCTTGCCAG                                                                                         |
| chr19 | 19397341  | 19397364  | hsa-mir-640    | +      | 4             | GACCAAGCCATAATTAGCATGCTT   | GACCAAGCCA                                                                                          | TAAT               | TAGCATGCTT                                                                                          |
| chr19 | 45489774  | 45489797  | hsa-mir-641    | -      | 4             | AGACAAGCATTGGGAAGCTTGCTG   | AGACAAGCAT                                                                                          | TTGG               | GAAGCTTGCTG                                                                                         |
| chr2  | 176717171 | 176717194 | hsa-mir-10b    | +      | 4             | AAGCATGTCTCAGTCAACATGCTT   | AAGCATGTCT                                                                                          | CAGT               | CACCATGCTT                                                                                          |
| chr20 | 26127127  | 26127150  | hsa-mir-663    | -      | 4             | AGTCAAGTTAAGATGAACATGCTT   | AGTCAAGTTA                                                                                          | AGAT               | GAACATGCTT                                                                                          |
| chr20 | 33034023  | 33034046  | hsa-mir-499    | +      | 4             | AGACTTGCCCACTCGGGCATGCTC   | AGACTTGCCC                                                                                          | ACTC               | GGGCATGCTC                                                                                          |
| chr21 | 36016587  | 36016610  | hsa-mir-802    | +      | 4             | GAGCTTGTGCAGAGAACTTGTTT    | GAGCTTGTGC                                                                                          | AGAG               | AAACTTGTTT                                                                                          |
| chr22 | 36561389  | 36561412  | hsa-mir-658    | -      | 4             | CAGCAAGCTCAGAAAATCAAGTCA   | CAGCAAGCTC                                                                                          | AGAA               | AATCAAGTCA                                                                                          |
| chr22 | 40619404  | 40619427  | hsa-mir-33     | +      | 4             | TAAGTGTCTTAAGGTCACAAGCCT   | TAAGTGTCTT                                                                                          | AAGG               | TCACAAGCCT                                                                                          |
| chr4  | 83891090  | 83891113  | hsa-mir-575    | -      | 4             | CAGCAAGTCAGCCAGGCTAGGCT    | CAGCAAGTCA                                                                                          | GCCC               | AGGCTAGGCT                                                                                          |
| chr5  | 54511807  | 54511830  | hsa-mir-449    | -      | 4             | TAGCATGTCCAGCAAGACATGTAG   | TAGCATGTCC                                                                                          | AGCA               | AGACATGTAG                                                                                          |
| chr5  | 54511807  | 54511830  | hsa-mir-449b   | -      | 4             | TAGCATGTCCAGCAAGACATGTAG   | TAGCATGTCC                                                                                          | AGCA               | AGACATGTAG                                                                                          |
| chr6  | 72165126  | 72165149  | hsa-mir-30a    | -      | 4             | TTACAAGTCCTTGAGAGCTTGTTT   | TTACAAGTCC                                                                                          | TTGA               | GAGCTTGTTT                                                                                          |
| chr6  | 119426393 | 119426416 | hsa-mir-548b   | -      | 4             | TAACATGTAAGTGGCAACATGTTT   | TAACATGTAA                                                                                          | CTGC               | GAACATGTTT                                                                                          |
| chr7  | 130210270 | 130210293 | hsa-mir-29a    | -      | 4             | AGACAAGTTTAGAAGAGCAGGCTG   | AGACAAGTTT                                                                                          | AGAA               | GAGCAGGCTG                                                                                          |
| chr7  | 130210270 | 130210293 | hsa-mir-29b-1  | -      | 4             | AGACAAGTTTAGAAGAGCAGGCTG   | AGACAAGTTT                                                                                          | AGAA               | GAGCAGGCTG                                                                                          |
| chr8  | 14746746  | 14746769  | hsa-mir-383    | -      | 4             | ATGCAAGCCTTACAATGCAAGTCT   | ATGCAAGCCT                                                                                          | TACA               | ATGCAAGTCT                                                                                          |
| chr9  | 4848877   | 4848900   | hsa-mir-101-2  | +      | 4             | AACCTTGCCCAATGAGACTTGCCA   | AACCTTGCCC                                                                                          | AATG               | AGACTTGCCA                                                                                          |
| chr9  | 21507138  | 21507161  | hsa-mir-31     | -      | 4             | AAGCAAGCCAACCCCAACATGTGA   | AAGCAAGCCA                                                                                          | ACCC               | CAACATGTGA                                                                                          |
| chr9  | 130047774 | 130047797 | hsa-mir-199b   | -      | 4             | AGGCATGGCTCTGCAACATGTAG    | AGGCATGGCT                                                                                          | CTGC               | AAACATGTAG                                                                                          |
| chr9  | 130052611 | 130052634 | hsa-mir-199b   | -      | 4             | GGGCTTGCCGTGGAGAGCTGGCTG   | GGGCTTGCCG                                                                                          | TGGA               | GAGCTGGCTG                                                                                          |
| chrX  | 49660900  | 49660923  | hsa-mir-188    | +      | 4             | GGGCATGTCCATGTGGCCTTGTGC   | GGGCATGTCC                                                                                          | ATGT               | GGCCTTGTGC                                                                                          |
| chrX  | 49660900  | 49660923  | hsa-mir-362    | +      | 4             | GGGCATGTCCATGTGGCCTTGTGC   | GGGCATGTCC                                                                                          | ATGT               | GGCCTTGTGC                                                                                          |

|       |           |           |                |   |   |                           |            |      |            |
|-------|-----------|-----------|----------------|---|---|---------------------------|------------|------|------------|
| chrX  | 49660900  | 49660923  | hsa-mir-500    | + | 4 | GGGCATGTCCATGTGGCCTTGTGC  | GGGCATGTCC | ATGT | GGCCTTGTGC |
| chrX  | 49660900  | 49660923  | hsa-mir-501    | + | 4 | GGGCATGTCCATGTGGCCTTGTGC  | GGGCATGTCC | ATGT | GGCCTTGTGC |
| chrX  | 49660900  | 49660923  | hsa-mir-502    | + | 4 | GGGCATGTCCATGTGGCCTTGTGC  | GGGCATGTCC | ATGT | GGCCTTGTGC |
| chrX  | 49660900  | 49660923  | hsa-mir-532    | + | 4 | GGGCATGTCCATGTGGCCTTGTGC  | GGGCATGTCC | ATGT | GGCCTTGTGC |
| chrX  | 49660900  | 49660923  | hsa-mir-660    | + | 4 | GGGCATGTCCATGTGGCCTTGTGC  | GGGCATGTCC | ATGT | GGCCTTGTGC |
| chrX  | 76056742  | 76056765  | hsa-mir-384    | - | 4 | AGACTGGTTTAGGCCAGCTAGCTT  | AGACTGGTTT | AGGC | CAGCTAGCTT |
| chrX  | 76056756  | 76056779  | hsa-mir-384    | - | 4 | CAGCTAGCTTGCAAATACATGCCA  | CAGCTAGCTT | GCAA | ATACATGCCA |
| chrX  | 146130688 | 146130711 | hsa-mir-508    | - | 4 | AGACATGTCTGCCATGACTGGCTA  | AGACATGTCT | GCCA | TGACTGGCTA |
| chr1  | 9124944   | 9124966   | hsa-mir-34a    | - | 3 | GGGCCTGCTCCAAAGGCTTGCTT   | GGGCCTGCTC | CAA  | AGGCTTGCTT |
| chr1  | 9129139   | 9129161   | hsa-mir-34a    | - | 3 | AGACAAGCCTGGGCAACATGGTG   | AGACAAGCCT | GGG  | CAACATGGTG |
| chr1  | 34911986  | 34912008  | hsa-mir-552    | - | 3 | CAGCATGTTGGCCAGGCTGGTCT   | CAGCATGTTG | GCC  | AGGCTGGTCT |
| chr1  | 100521137 | 100521159 | hsa-mir-553    | + | 3 | CACCATGTTGGCCAGGCTAGTCT   | CACCATGTTG | GCC  | AGGCTAGTCT |
| chr1  | 149781528 | 149781550 | hsa-mir-554    | + | 3 | CACCATGTTGCCAGGCTAGTCT    | CACCATGTTG | CCC  | AGGCTAGTCT |
| chr1  | 154647881 | 154647903 | hsa-mir-9-1    | - | 3 | AGGCATGTGATCCAGGCTTGGTC   | AGGCATGTGA | TCC  | AGGCTTGGTC |
| chr1  | 160588669 | 160588691 | hsa-mir-556    | + | 3 | CACCATGTTGGCCAGGCTTGCC    | CACCATGTTG | GCC  | AGGCTTGCC  |
| chr1  | 206037842 | 206037864 | hsa-mir-29b-2  | - | 3 | TCGCATGTTGCCCAAGCTAGTCT   | TCGCATGTTG | CCC  | AAGCTAGTCT |
| chr1  | 206037842 | 206037864 | hsa-mir-29c    | - | 3 | TCGCATGTTGCCCAAGCTAGTCT   | TCGCATGTTG | CCC  | AAGCTAGTCT |
| chr1  | 206040790 | 206040812 | hsa-mir-29b-2  | - | 3 | AGACAAGCCTGGCCAACATGATG   | AGACAAGCCT | GGC  | CAACATGATG |
| chr1  | 206040790 | 206040812 | hsa-mir-29c    | - | 3 | AGACAAGCCTGGCCAACATGATG   | AGACAAGCCT | GGC  | CAACATGATG |
| chr10 | 17936163  | 17936185  | hsa-mir-511-1  | + | 3 | TGCCATGTTGCCCAAGCTAGTCT   | TGCCATGTTG | CCC  | AAGCTAGTCT |
| chr10 | 18183083  | 18183105  | hsa-mir-511-2  | + | 3 | TGCCATGTTGCCCAAGCTAGTCT   | TGCCATGTTG | CCC  | AAGCTAGTCT |
| chr10 | 88018527  | 88018549  | hsa-mir-346    | - | 3 | AGACTAGCCTGGTCAACATGGTG   | AGACTAGCCT | GGT  | CAACATGGTG |
| chr10 | 98574538  | 98574560  | hsa-mir-607    | - | 3 | AGACTAGTCTGGCCAACATGATG   | AGACTAGTCT | GGC  | CAACATGATG |
| chr11 | 64408765  | 64408787  | hsa-mir-192    | - | 3 | AGACTAGCCTGGGTAACATGGCA   | AGACTAGCCT | GGG  | TAACATGGCA |
| chr11 | 64408765  | 64408787  | hsa-mir-194-2  | - | 3 | AGACTAGCCTGGGTAACATGGCA   | AGACTAGCCT | GGG  | TAACATGGCA |
| chr12 | 12804638  | 12804660  | hsa-mir-613    | + | 3 | AGACCAGCCTGGCCAACATGPCA   | AGACCAGCCT | GCC  | CAACATGPCA |
| chr14 | 100573807 | 100573829 | hsa-mir-368    | + | 3 | AGACTTGCTTCCTCAACAAGCTG   | AGACTTGCTT | CCT  | CAACAAGCTG |
| chr14 | 100573807 | 100573829 | hsa-mir-376a-1 | + | 3 | AGACTTGCTTCCTCAACAAGCTG   | AGACTTGCTT | CCT  | CAACAAGCTG |
| chr14 | 100573807 | 100573829 | hsa-mir-376a-2 | + | 3 | AGACTTGCTTCCTCAACAAGCTG   | AGACTTGCTT | CCT  | CAACAAGCTG |
| chr14 | 100573807 | 100573829 | hsa-mir-376b   | + | 3 | AGACTTGCTTCCTCAACAAGCTG   | AGACTTGCTT | CCT  | CAACAAGCTG |
| chr14 | 100573807 | 100573829 | hsa-mir-381    | + | 3 | AGACTTGCTTCCTCAACAAGCTG   | AGACTTGCTT | CCT  | CAACAAGCTG |
| chr14 | 100573807 | 100573829 | hsa-mir-487b   | + | 3 | AGACTTGCTTCCTCAACAAGCTG   | AGACTTGCTT | CCT  | CAACAAGCTG |
| chr14 | 100573807 | 100573829 | hsa-mir-494    | + | 3 | AGACTTGCTTCCTCAACAAGCTG   | AGACTTGCTT | CCT  | CAACAAGCTG |
| chr14 | 100573807 | 100573829 | hsa-mir-495    | + | 3 | AGACTTGCTTCCTCAACAAGCTG   | AGACTTGCTT | CCT  | CAACAAGCTG |
| chr14 | 100573807 | 100573829 | hsa-mir-539    | + | 3 | AGACTTGCTTCCTCAACAAGCTG   | AGACTTGCTT | CCT  | CAACAAGCTG |
| chr14 | 100573807 | 100573829 | hsa-mir-654    | + | 3 | AGACTTGCTTCCTCAACAAGCTG   | AGACTTGCTT | CCT  | CAACAAGCTG |
| chr14 | 103655627 | 103655649 | hsa-mir-203    | + | 3 | AAGCAAGTGACCTGGCAAGTCC    | AAGCAAGTGA | CCT  | TGGCAAGTCC |
| chr15 | 40282620  | 40282642  | hsa-mir-627    | - | 3 | AGACTAGCCTGGCCAACATGGTG   | AGACTAGCCT | GGC  | CAACATGGTG |
| chr15 | 61956365  | 61956387  | hsa-mir-422a   | - | 3 | GGGCTTGGCCATAGGACTTGCTT   | GGGCTTGGCC | ATA  | GGACTTGCTT |
| chr15 | 73441525  | 73441547  | hsa-mir-631    | - | 3 | GGACTAGGCCATGCAACTTGTC    | GGACTAGGCC | ATG  | CAACTTGTC  |
| chr17 | 25470088  | 25470110  | hsa-mir-423    | + | 3 | CACCATGTTGGCCGGGCTAGTCT   | CACCATGTTG | GCC  | GGGCTAGTCT |
| chr17 | 44071717  | 44071739  | hsa-mir-196a-1 | - | 3 | AGACAAGCCTGCTGGGCAAGAAC   | AGACAAGCCT | GCT  | GGGCAAGAAC |
| chr17 | 54564606  | 54564628  | hsa-mir-454    | - | 3 | AGGCTAGCCTGGCCAACATGGCA   | AGGCTAGCCT | GGC  | CAACATGGCA |
| chr17 | 54566493  | 54566515  | hsa-mir-454    | - | 3 | ATACAAGTCTTTAAAGCTTGTTT   | ATACAAGTCT | TTA  | AAGCTTGTTT |
| chr17 | 58374950  | 58374972  | hsa-mir-633    | + | 3 | TGCCTTGTTTACTGAACATGTCC   | TGCCTTGTTT | ACT  | GAACATGTCC |
| chr17 | 62220979  | 62221001  | hsa-mir-634    | + | 3 | TAGCTTGTTTATAGAGAGCTTGATG | TAGCTTGTTT | AGA  | GAGCTTGATG |

|       |          |          |                |   |   |                         |            |     |            |
|-------|----------|----------|----------------|---|---|-------------------------|------------|-----|------------|
| chr19 | 3911576  | 3911598  | hsa-mir-637    | - | 3 | AGACAAGCCTGGGCAACATGGTG | AGACAAGCCT | GGG | CAACATGGTG |
| chr19 | 4729641  | 4729663  | hsa-mir-7-3    | + | 3 | TACCATGTTGGCCAAGCTAGTCT | TACCATGTTG | GCC | AAGCTAGTCT |
| chr19 | 13817218 | 13817240 | hsa-mir-23a    | - | 3 | AGACAAGCCTGGCCAACATGGTG | AGACAAGCCT | GGC | CAACATGGTG |
| chr19 | 13817218 | 13817240 | hsa-mir-24-2   | - | 3 | AGACAAGCCTGGCCAACATGGTG | AGACAAGCCT | GGC | CAACATGGTG |
| chr19 | 13817218 | 13817240 | hsa-mir-27a    | - | 3 | AGACAAGCCTGGCCAACATGGTG | AGACAAGCCT | GGC | CAACATGGTG |
| chr19 | 19407230 | 19407252 | hsa-mir-640    | + | 3 | CACCATGTTGCCCGGGCTTGCT  | CACCATGTTG | CCC | GGGCTTGCT  |
| chr19 | 45470625 | 45470647 | hsa-mir-641    | - | 3 | GGGCAAGTCACCAAGTCATGTT  | GGGCAAGTCA | CCA | AGTCATGTT  |
| chr19 | 45487364 | 45487386 | hsa-mir-641    | - | 3 | GGACAAGCTGTGGGACTAGTCA  | GGACAAGCTG | TGG | GGACTAGTCA |
| chr19 | 51208451 | 51208473 | hsa-mir-769    | + | 3 | TACCTTGTTGCCAGGCATGTCT  | TACCTTGTTG | CCC | AGGCATGTCT |
| chr19 | 58885368 | 58885390 | hsa-mir-515-2  | + | 3 | CACCATGTTGCCAGGCTTGCT   | CACCATGTTG | CCC | AGGCTTGCT  |
| chr19 | 58885368 | 58885390 | hsa-mir-518f   | + | 3 | CACCATGTTGCCAGGCTTGCT   | CACCATGTTG | CCC | AGGCTTGCT  |
| chr19 | 58885368 | 58885390 | hsa-mir-519b   | + | 3 | CACCATGTTGCCAGGCTTGCT   | CACCATGTTG | CCC | AGGCTTGCT  |
| chr19 | 58885368 | 58885390 | hsa-mir-519c   | + | 3 | CACCATGTTGCCAGGCTTGCT   | CACCATGTTG | CCC | AGGCTTGCT  |
| chr19 | 58885368 | 58885390 | hsa-mir-520a   | + | 3 | CACCATGTTGCCAGGCTTGCT   | CACCATGTTG | CCC | AGGCTTGCT  |
| chr19 | 58885368 | 58885390 | hsa-mir-520f   | + | 3 | CACCATGTTGCCAGGCTTGCT   | CACCATGTTG | CCC | AGGCTTGCT  |
| chr19 | 58885368 | 58885390 | hsa-mir-523    | + | 3 | CACCATGTTGCCAGGCTTGCT   | CACCATGTTG | CCC | AGGCTTGCT  |
| chr19 | 58885368 | 58885390 | hsa-mir-525    | + | 3 | CACCATGTTGCCAGGCTTGCT   | CACCATGTTG | CCC | AGGCTTGCT  |
| chr19 | 58885368 | 58885390 | hsa-mir-526b   | + | 3 | CACCATGTTGCCAGGCTTGCT   | CACCATGTTG | CCC | AGGCTTGCT  |
| chr19 | 58897055 | 58897077 | hsa-mir-518b   | + | 3 | CACCATGTTGCCAGGCTAGTCT  | CACCATGTTG | CCC | AGGCTAGTCT |
| chr19 | 58897055 | 58897077 | hsa-mir-518c   | + | 3 | CACCATGTTGCCAGGCTAGTCT  | CACCATGTTG | CCC | AGGCTAGTCT |
| chr19 | 58897055 | 58897077 | hsa-mir-518f   | + | 3 | CACCATGTTGCCAGGCTAGTCT  | CACCATGTTG | CCC | AGGCTAGTCT |
| chr19 | 58897055 | 58897077 | hsa-mir-519b   | + | 3 | CACCATGTTGCCAGGCTAGTCT  | CACCATGTTG | CCC | AGGCTAGTCT |
| chr19 | 58897055 | 58897077 | hsa-mir-520b   | + | 3 | CACCATGTTGCCAGGCTAGTCT  | CACCATGTTG | CCC | AGGCTAGTCT |
| chr19 | 58897055 | 58897077 | hsa-mir-520c   | + | 3 | CACCATGTTGCCAGGCTAGTCT  | CACCATGTTG | CCC | AGGCTAGTCT |
| chr19 | 58897055 | 58897077 | hsa-mir-523    | + | 3 | CACCATGTTGCCAGGCTAGTCT  | CACCATGTTG | CCC | AGGCTAGTCT |
| chr19 | 58897055 | 58897077 | hsa-mir-524    | + | 3 | CACCATGTTGCCAGGCTAGTCT  | CACCATGTTG | CCC | AGGCTAGTCT |
| chr19 | 58897055 | 58897077 | hsa-mir-525    | + | 3 | CACCATGTTGCCAGGCTAGTCT  | CACCATGTTG | CCC | AGGCTAGTCT |
| chr19 | 58897055 | 58897077 | hsa-mir-526a-1 | + | 3 | CACCATGTTGCCAGGCTAGTCT  | CACCATGTTG | CCC | AGGCTAGTCT |
| chr19 | 58897055 | 58897077 | hsa-mir-526b   | + | 3 | CACCATGTTGCCAGGCTAGTCT  | CACCATGTTG | CCC | AGGCTAGTCT |
| chr19 | 58907932 | 58907954 | hsa-mir-517a   | + | 3 | CACCATGTTGGCCAGGCTAGTCT | CACCATGTTG | GCC | AGGCTAGTCT |
| chr19 | 58907932 | 58907954 | hsa-mir-517b   | + | 3 | CACCATGTTGGCCAGGCTAGTCT | CACCATGTTG | GCC | AGGCTAGTCT |
| chr19 | 58907932 | 58907954 | hsa-mir-518c   | + | 3 | CACCATGTTGGCCAGGCTAGTCT | CACCATGTTG | GCC | AGGCTAGTCT |
| chr19 | 58907932 | 58907954 | hsa-mir-519d   | + | 3 | CACCATGTTGGCCAGGCTAGTCT | CACCATGTTG | GCC | AGGCTAGTCT |
| chr19 | 58907932 | 58907954 | hsa-mir-520c   | + | 3 | CACCATGTTGGCCAGGCTAGTCT | CACCATGTTG | GCC | AGGCTAGTCT |
| chr19 | 58907932 | 58907954 | hsa-mir-520d   | + | 3 | CACCATGTTGGCCAGGCTAGTCT | CACCATGTTG | GCC | AGGCTAGTCT |
| chr19 | 58907932 | 58907954 | hsa-mir-520g   | + | 3 | CACCATGTTGGCCAGGCTAGTCT | CACCATGTTG | GCC | AGGCTAGTCT |
| chr19 | 58907932 | 58907954 | hsa-mir-521-2  | + | 3 | CACCATGTTGGCCAGGCTAGTCT | CACCATGTTG | GCC | AGGCTAGTCT |
| chr19 | 58907932 | 58907954 | hsa-mir-524    | + | 3 | CACCATGTTGGCCAGGCTAGTCT | CACCATGTTG | GCC | AGGCTAGTCT |
| chr19 | 58907932 | 58907954 | hsa-mir-526a-1 | + | 3 | CACCATGTTGGCCAGGCTAGTCT | CACCATGTTG | GCC | AGGCTAGTCT |
| chr19 | 58909150 | 58909172 | hsa-mir-517a   | + | 3 | CACCATGTTGGCCAGGCTAGTCT | CACCATGTTG | GCC | AGGCTAGTCT |
| chr19 | 58909150 | 58909172 | hsa-mir-517b   | + | 3 | CACCATGTTGGCCAGGCTAGTCT | CACCATGTTG | GCC | AGGCTAGTCT |
| chr19 | 58909150 | 58909172 | hsa-mir-518c   | + | 3 | CACCATGTTGGCCAGGCTAGTCT | CACCATGTTG | GCC | AGGCTAGTCT |
| chr19 | 58909150 | 58909172 | hsa-mir-519d   | + | 3 | CACCATGTTGGCCAGGCTAGTCT | CACCATGTTG | GCC | AGGCTAGTCT |
| chr19 | 58909150 | 58909172 | hsa-mir-520c   | + | 3 | CACCATGTTGGCCAGGCTAGTCT | CACCATGTTG | GCC | AGGCTAGTCT |
| chr19 | 58909150 | 58909172 | hsa-mir-520d   | + | 3 | CACCATGTTGGCCAGGCTAGTCT | CACCATGTTG | GCC | AGGCTAGTCT |
| chr19 | 58909150 | 58909172 | hsa-mir-520g   | + | 3 | CACCATGTTGGCCAGGCTAGTCT | CACCATGTTG | GCC | AGGCTAGTCT |

|       |           |           |                |   |   |                          |            |     |            |
|-------|-----------|-----------|----------------|---|---|--------------------------|------------|-----|------------|
| chr19 | 58909150  | 58909172  | hsa-mir-521-2  | + | 3 | CACCATGTTGGCCAGGCTAGTCT  | CACCATGTTG | GCC | AGGCTAGTCT |
| chr19 | 58909150  | 58909172  | hsa-mir-524    | + | 3 | CACCATGTTGGCCAGGCTAGTCT  | CACCATGTTG | GCC | AGGCTAGTCT |
| chr19 | 58909150  | 58909172  | hsa-mir-526a-1 | + | 3 | CACCATGTTGGCCAGGCTAGTCT  | CACCATGTTG | GCC | AGGCTAGTCT |
| chr19 | 58981616  | 58981638  | hsa-mir-371    | + | 3 | CGCCATGTTGCCAGGCTAGTCT   | CGCCATGTTG | CCC | AGGCTAGTCT |
| chr19 | 58981616  | 58981638  | hsa-mir-372    | + | 3 | CGCCATGTTGCCAGGCTAGTCT   | CGCCATGTTG | CCC | AGGCTAGTCT |
| chr19 | 58981616  | 58981638  | hsa-mir-373    | + | 3 | CGCCATGTTGCCAGGCTAGTCT   | CGCCATGTTG | CCC | AGGCTAGTCT |
| chr2  | 176714186 | 176714208 | hsa-mir-10b    | + | 3 | GAAGTAGCCAGATGCGCATGTCT  | GAAGTAGCCA | GAT | GCGCATGTCT |
| chr2  | 188871961 | 188871983 | hsa-mir-561    | + | 3 | CAGCTAGTCCCTACTGCTTGTCT  | CAGCTAGTCC | CTA | CTGCTGTCTT |
| chr2  | 188876771 | 188876793 | hsa-mir-561    | + | 3 | AAACATGCTTGAGATGCTTGTCT  | AAACATGCTT | GAG | ATGCTGTCTT |
| chr2  | 218966641 | 218966663 | hsa-mir-26b    | + | 3 | CATCATGTTGGCCAGGCTAGTCT  | CATCATGTTG | GCC | AGGCTAGTCT |
| chr2  | 218984892 | 218984914 | hsa-mir-26b    | + | 3 | CACCATGTTGGCCAGGCTAGTCT  | CACCATGTTG | GCC | AGGCTAGTCT |
| chr2  | 232749041 | 232749063 | hsa-mir-562    | + | 3 | CACCATGTTGGCCAGGCTAGTCT  | CACCATGTTG | GCC | AGGCTAGTCT |
| chr20 | 48638570  | 48638592  | hsa-mir-645    | + | 3 | AAACATGATCATAAGACATGATT  | AAACATGATC | ATA | AGACATGATT |
| chr20 | 56817091  | 56817113  | hsa-mir-296    | - | 3 | AGGCTTGCTGGGGGACTGGGG    | AGGCTTGCT  | GGG | GGGCTGGGG  |
| chr20 | 56826344  | 56826366  | hsa-mir-296    | - | 3 | AAACATGCACATCCAGCTTGCT   | AAACATGCAC | ATC | CAGCTGCCT  |
| chr22 | 36569498  | 36569520  | hsa-mir-658    | - | 3 | AAACAAGCTGGTACGACTTGCT   | AAACAAGCTG | GTA | CGACTTGCT  |
| chr22 | 36569498  | 36569520  | hsa-mir-659    | - | 3 | AAACAAGCTGGTACGACTTGCT   | AAACAAGCTG | GTA | CGACTTGCT  |
| chr22 | 36571621  | 36571643  | hsa-mir-658    | - | 3 | AGACAAGCCTGGCCAACATGATG  | AGACAAGCCT | GGC | CAACATGATG |
| chr22 | 36571621  | 36571643  | hsa-mir-659    | - | 3 | AGACAAGCCTGGCCAACATGATG  | AGACAAGCCT | GGC | CAACATGATG |
| chr22 | 44888996  | 44889018  | hsa-let-7a-3   | + | 3 | GGGCATGTGGGGTGGGCTTGTCT  | GGGCATGTGG | GGT | GGGCTGTCT  |
| chr22 | 44888996  | 44889018  | hsa-let-7b     | + | 3 | GGGCATGTGGGGTGGGCTTGTCT  | GGGCATGTGG | GGT | GGGCTGTCT  |
| chr3  | 52300727  | 52300749  | hsa-mir-135a-1 | - | 3 | GGGCTTGTCACCCCTGCTTGCT   | GGGCTTGTC  | CCC | CTGCTTGCT  |
| chr3  | 189889173 | 189889195 | hsa-mir-28     | + | 3 | TGGCTTGCTATTTCAGCAAGCAC  | TGGCTTGCT  | ATT | CAGCAAGCAC |
| chr3  | 196914412 | 196914434 | hsa-mir-570    | + | 3 | CGCCATGTTAGCCAGGCTAGTCT  | CGCCATGTTA | GCC | AGGCTAGTCT |
| chr4  | 337447    | 337469    | hsa-mir-571    | + | 3 | CACCATGTTGGCCAGGCTAGTCT  | CACCATGTTG | GCC | AGGCTAGTCT |
| chr4  | 24129687  | 24129709  | hsa-mir-573    | - | 3 | AGACAAGCCTGGCCAACATGGCG  | AGACAAGCCT | GGC | CAACATGGCG |
| chr4  | 83902149  | 83902171  | hsa-mir-575    | - | 3 | AGACTAGCCTGGCCAACATGGCA  | AGACTAGCCT | GGG | CAACATGGCA |
| chr5  | 32431884  | 32431906  | hsa-mir-579    | - | 3 | AGACTAGCCCGCCAACATGGTG   | AGACTAGCCC | GGC | CAACATGGTG |
| chr5  | 32435698  | 32435720  | hsa-mir-579    | - | 3 | AGGCAGGCTTAAAGGACATGCTT  | AGGCAGGCTT | AAA | GGACATGCTT |
| chr5  | 148417394 | 148417416 | hsa-mir-584    | - | 3 | ATACATGCTGCCAAGCAAGCTC   | ATACATGCTG | CCA | AAGCAAGCTC |
| chr6  | 135598676 | 135598698 | hsa-mir-548a-2 | + | 3 | GGCCTAGCCCAGCAGGCAAGCCC  | GGCCTAGCCC | AGC | AGGCAAGCCC |
| chr7  | 30299586  | 30299608  | hsa-mir-550-1  | + | 3 | TGCCATGTTGGCCAGGCTAGTCT  | TGCCATGTTG | GCC | AGGCTAGTCT |
| chr7  | 95692082  | 95692104  | hsa-mir-591    | - | 3 | GGGCTTGCTCCAAAAGCATGAGT  | GGGCTTGCTC | CAA | AAGCATGAGT |
| chr7  | 129209744 | 129209766 | hsa-mir-183    | - | 3 | CGGCTTGCTCCCTCTGGCTTGCTC | CGGCTTGCTC | CTC | TGGCTTGCTC |
| chr7  | 129209744 | 129209766 | hsa-mir-96     | - | 3 | CGGCTTGCTCCCTCTGGCTTGCTC | CGGCTTGCTC | CTC | TGGCTTGCTC |
| chr7  | 157056335 | 157056357 | hsa-mir-153-2  | - | 3 | AAGCAAGGTGGCAGGACATGCTC  | AAGCAAGGTG | GCA | GGACATGCTC |
| chr7  | 157069136 | 157069158 | hsa-mir-153-2  | - | 3 | AGACTAGCCTCGCCAACATGGCA  | AGACTAGCCT | CGC | CAACATGGCA |
| chr8  | 14754994  | 14755016  | hsa-mir-383    | - | 3 | AAGCATGCATATAAACTTGATC   | AAGCATGCAT | ATA | AAACTTGATC |
| chr8  | 22151347  | 22151369  | hsa-mir-320    | - | 3 | AGACTAGCCTGGCCAACATGGTG  | AGACTAGCCT | GGG | CAACATGGTG |
| chr9  | 20702928  | 20702950  | hsa-mir-491    | + | 3 | CGCCATGTTGGCCAGGCTAGTCT  | CGCCATGTTG | GCC | AGGCTAGTCT |
| chr9  | 130048197 | 130048219 | hsa-mir-199b   | - | 3 | TGGCTTGATCCAGGACTTGCT    | TGGCTTGAT  | CCA | GGACTTGCT  |
| chrX  | 49663432  | 49663454  | hsa-mir-188    | + | 3 | TCACATGCCTAGTGAGCATGTTT  | TCACATGCCT | AGT | GAGCATGTTT |
| chrX  | 49663432  | 49663454  | hsa-mir-362    | + | 3 | TCACATGCCTAGTGAGCATGTTT  | TCACATGCCT | AGT | GAGCATGTTT |
| chrX  | 49663432  | 49663454  | hsa-mir-500    | + | 3 | TCACATGCCTAGTGAGCATGTTT  | TCACATGCCT | AGT | GAGCATGTTT |
| chrX  | 49663432  | 49663454  | hsa-mir-501    | + | 3 | TCACATGCCTAGTGAGCATGTTT  | TCACATGCCT | AGT | GAGCATGTTT |
| chrX  | 49663432  | 49663454  | hsa-mir-502    | + | 3 | TCACATGCCTAGTGAGCATGTTT  | TCACATGCCT | AGT | GAGCATGTTT |

|       |           |           |                |   |   |                          |            |     |             |
|-------|-----------|-----------|----------------|---|---|--------------------------|------------|-----|-------------|
| chrX  | 49663432  | 49663454  | hsa-mir-532    | + | 3 | TCACATGCCTAGTGAGCATGTTT  | TCACATGCCT | AGT | GAGCATGTTT  |
| chrX  | 49663432  | 49663454  | hsa-mir-660    | + | 3 | TCACATGCCTAGTGAGCATGTTT  | TCACATGCCT | AGT | GAGCATGTTT  |
| chrX  | 53606328  | 53606350  | hsa-let-7f-2   | - | 3 | GGGCAAGCAGTAGTAACATGTTA  | GGGCAAGCAG | TAG | TAACATGTTA  |
| chrX  | 53606328  | 53606350  | hsa-mir-98     | - | 3 | GGGCAAGCAGTAGTAACATGTTA  | GGGCAAGCAG | TAG | TAACATGTTA  |
| chrX  | 53606755  | 53606777  | hsa-let-7f-2   | - | 3 | CAGCTAGCTAGGTGAGCTTGCC   | CAGCTAGCTA | GGT | GAGCTTGCC   |
| chrX  | 53606755  | 53606777  | hsa-mir-98     | - | 3 | CAGCTAGCTAGGTGAGCTTGCC   | CAGCTAGCTA | GGT | GAGCTTGCC   |
| chrX  | 73425753  | 73425775  | hsa-mir-374    | - | 3 | AGACAAGCCTGAGCAACATGGCA  | AGACAAGCCT | GAG | CAACATGGCA  |
| chrX  | 73425753  | 73425775  | hsa-mir-545    | - | 3 | AGACAAGCCTGAGCAACATGGCA  | AGACAAGCCT | GAG | CAACATGGCA  |
| chrX  | 138837226 | 138837248 | hsa-mir-505    | - | 3 | AGACTAGCCTGGCCAACATGGTG  | AGACTAGCCT | GGC | CAACATGGTG  |
| chr1  | 34903235  | 34903256  | hsa-mir-552    | - | 2 | AGGCTAGTGTCCAAGCTAGTTC   | AGGCTAGTGT | CC  | AAGCTAGTTC  |
| chr1  | 170376606 | 170376627 | hsa-mir-199a-2 | - | 2 | GAACCTGCCCCATAAAGCTTGTTA | GAACCTGCCC | CT  | AACTTGTTA   |
| chr1  | 170376606 | 170376627 | hsa-mir-214    | - | 2 | GAACCTGCCCCATAAAGCTTGTTA | GAACCTGCCC | CT  | AACTTGTTA   |
| chr1  | 203683375 | 203683396 | hsa-mir-135b   | - | 2 | AGGCAAGCTGAGTGACAAGCAG   | AGGCAAGCTG | AG  | TGACAAGCAG  |
| chr10 | 91337624  | 91337645  | hsa-mir-107    | - | 2 | AAGCAAGCTAATTAACATGTAT   | AAGCAAGCTA | AT  | TAACATGTAT  |
| chr11 | 567724    | 567745    | hsa-mir-210    | - | 2 | GGACTTGGCTGCAGGCTTGTTTC  | GGACTTGGCT | GC  | AGGCTTGTTTC |
| chr11 | 43567965  | 43567986  | hsa-mir-129-2  | + | 2 | CTGCATGCCCTTGAGCAAGTTA   | CTGCATGCC  | TT  | GAGCAAGTTA  |
| chr11 | 74727669  | 74727690  | hsa-mir-326    | - | 2 | AACTTGCCCTACAGACATGCAA   | AACTTGCCCT | AC  | AGACATGCAA  |
| chr12 | 52723246  | 52723267  | hsa-mir-615    | + | 2 | AGGCATGCTGGGGAGCAAGTGC   | AGGCATGCTG | GG  | GAGCAAGTGC  |
| chr12 | 61280132  | 61280153  | hsa-let-7i     | + | 2 | GGGCAAGTTAATTAACCTGTTT   | GGGCAAGTTA | AT  | TAACCTGTTT  |
| chr12 | 94235528  | 94235549  | hsa-mir-331    | + | 2 | AGACATGCTCACATACATGCAT   | AGACATGCTC | AC  | ATACATGCAT  |
| chr12 | 115066691 | 115066712 | hsa-mir-620    | - | 2 | AATCTTGGCTCAAAGCATGCTC   | AATCTTGGCT | CA  | AAGCATGCTC  |
| chr12 | 115071096 | 115071117 | hsa-mir-620    | - | 2 | AAGCATGGCTCTGATCATGTTT   | AAGCATGGCT | CT  | GATCATGTTT  |
| chr14 | 30557646  | 30557667  | hsa-mir-624    | - | 2 | GAGCTTGTGATAAACTTGCAA    | GAGCTTGTG  | AT  | AACTTGCAA   |
| chr14 | 65004520  | 65004541  | hsa-mir-625    | + | 2 | TAACCTGTTTGTGACAAGTTG    | TAACCTGTTT | GT  | TGACAAGTTG  |
| chr14 | 99641218  | 99641239  | hsa-mir-342    | + | 2 | AATCATGCTACTTAGCATGTTT   | AATCATGCTA | CT  | TAGCATGTTT  |
| chr16 | 55451015  | 55451036  | hsa-mir-138-2  | + | 2 | CACCATGCCCACTGACTAGTCT   | CACCATGCC  | AC  | TGACTAGTCT  |
| chr17 | 53763829  | 53763850  | hsa-mir-142    | - | 2 | CAGCATGGCGCCAGACTTGCCCT  | CAGCATGGCG | CC  | AGACTTGCCCT |
| chr17 | 62220636  | 62220657  | hsa-mir-634    | + | 2 | TAGCTAGTTCATAGGCAAGCCA   | TAGCTAGTTC | AT  | AGGCAAGCCA  |
| chr19 | 13855510  | 13855531  | hsa-mir-181c   | + | 2 | AACCTAGCTCAGAGGCAAGCCC   | AACCTAGCTC | AG  | AGGCAAGCCC  |
| chr19 | 13855510  | 13855531  | hsa-mir-181d   | + | 2 | AACCTAGCTCAGAGGCAAGCCC   | AACCTAGCTC | AG  | AGGCAAGCCC  |

|       |           |           |                |   |   |                         |            |    |             |
|-------|-----------|-----------|----------------|---|---|-------------------------|------------|----|-------------|
| chr2  | 176718981 | 176719002 | hsa-mir-10b    | + | 2 | AGACATGCCACCAACTAGCCT   | AGACATGCCC | AC | CAACTAGCCT  |
| chr20 | 33051584  | 33051605  | hsa-mir-499    | + | 2 | ACTCTTGTCATGAAGCTTGCTC  | ACTCTTGTC  | AT | GAAGCTTGCTC |
| chr21 | 25872051  | 25872072  | hsa-mir-155    | + | 2 | AAGCTTGTCGAAGATGCATGTTC | AAGCTTGTC  | AG | ATGCATGTTC  |
| chr22 | 19714729  | 19714750  | hsa-mir-649    | - | 2 | GAACAAGGGCATGAGCTTGCT   | GAACAAGGGC | AT | GAGCTTGCT   |
| chr3  | 45700803  | 45700824  | hsa-mir-565    | - | 2 | AGACTTGGTCCACGGCAAGCCT  | AGACTTGGTC | CA | CGGCAAGCCT  |
| chr3  | 196914731 | 196914752 | hsa-mir-570    | + | 2 | CCACATGTCCCAGCACATGTCC  | CCACATGTCC | CA | GCACATGTCC  |
| chr7  | 126487449 | 126487470 | hsa-mir-592    | - | 2 | AGGCAAGTTTTTCAAACAAGTTT | AGGCAAGTTT | TC | AAACAAGTTT  |
| chr8  | 105560143 | 105560164 | hsa-mir-548a-3 | - | 2 | TGACTAGCCTATAGACAAGTTC  | TGACTAGCCT | AT | AGACAAGTTC  |
| chr8  | 141812891 | 141812912 | hsa-mir-151    | - | 2 | CAACATGCAATAAAGCATGTCC  | CAACATGCAA | TA | AAGCATGTCC  |
| chr9  | 4834119   | 4834140   | hsa-mir-101-2  | + | 2 | AAACAAGTATTTTGGCTAGTCT  | AAACAAGTAT | TT | TGGCTAGTCT  |
| chr9  | 110838805 | 110838826 | hsa-mir-32     | - | 2 | GAACATGTGTCAAAACTTGTAC  | GAACATGTGT | CA | AAACTTGTAC  |
| chrX  | 133125092 | 133125113 | hsa-mir-106a   | - | 2 | GGACTTGGTTTTTGGCTTGCTA  | GGACTTGGTT | TT | TGGCTTGCTA  |
| chrX  | 133125092 | 133125113 | hsa-mir-18b    | - | 2 | GGACTTGGTTTTTGGCTTGCTA  | GGACTTGGTT | TT | TGGCTTGCTA  |
| chrX  | 133125092 | 133125113 | hsa-mir-19b-2  | - | 2 | GGACTTGGTTTTTGGCTTGCTA  | GGACTTGGTT | TT | TGGCTTGCTA  |
| chrX  | 133125092 | 133125113 | hsa-mir-20b    | - | 2 | GGACTTGGTTTTTGGCTTGCTA  | GGACTTGGTT | TT | TGGCTTGCTA  |
| chrX  | 133125092 | 133125113 | hsa-mir-363    | - | 2 | GGACTTGGTTTTTGGCTTGCTA  | GGACTTGGTT | TT | TGGCTTGCTA  |
| chrX  | 133125092 | 133125113 | hsa-mir-92-2   | - | 2 | GGACTTGGTTTTTGGCTTGCTA  | GGACTTGGTT | TT | TGGCTTGCTA  |
| chrX  | 137580389 | 137580410 | hsa-mir-504    | - | 2 | AAGCAAGTTACAGAACAGGTCA  | AAGCAAGTTA | CA | GAACAGGTCA  |
| chrX  | 146159460 | 146159481 | hsa-mir-509    | - | 2 | AGGCCAGCTCAGAGGCATGTCC  | AGGCCAGCTC | AG | AGGCATGTCC  |
| chrX  | 146159460 | 146159481 | hsa-mir-510    | - | 2 | AGGCCAGCTCAGAGGCATGTCC  | AGGCCAGCTC | AG | AGGCATGTCC  |
| chrX  | 146159460 | 146159481 | hsa-mir-514-1  | - | 2 | AGGCCAGCTCAGAGGCATGTCC  | AGGCCAGCTC | AG | AGGCATGTCC  |
| chr1  | 1084597   | 1084617   | hsa-mir-200a   | + | 1 | GAGCAAGTCTGGGCCATGCTG   | GAGCAAGTCT | G  | GGCCATGCTG  |
| chr1  | 1084597   | 1084617   | hsa-mir-200b   | + | 1 | GAGCAAGTCTGGGCCATGCTG   | GAGCAAGTCT | G  | GGCCATGCTG  |
| chr1  | 1084597   | 1084617   | hsa-mir-429    | + | 1 | GAGCAAGTCTGGGCCATGCTG   | GAGCAAGTCT | G  | GGCCATGCTG  |
| chr1  | 34908417  | 34908437  | hsa-mir-552    | - | 1 | CAACTTGCTATAGCTTGCTT    | CAACTTGCT  | A  | TGAGCTTGCTT |
| chr11 | 74723261  | 74723281  | hsa-mir-326    | - | 1 | GGACAAGCCTGGGGCTAGACC   | GGACAAGCCT | G  | GGGCTAGACC  |
| chr12 | 6934052   | 6934072   | hsa-mir-141    | + | 1 | TACCTAGCTCTCAGCATGTTT   | TACCTAGCTC | T  | CAGCATGTTT  |
| chr12 | 6934052   | 6934072   | hsa-mir-200c   | + | 1 | TACCTAGCTCTCAGCATGTTT   | TACCTAGCTC | T  | CAGCATGTTT  |
| chr12 | 79741130  | 79741150  | hsa-mir-617    | - | 1 | AAACAGGGCTCAAACATGCC    | AAACAGGGCT | C  | AAACATGCC   |
| chr12 | 79754277  | 79754297  | hsa-mir-617    | - | 1 | AAACTAGCTCCTGGCATGGTG   | AAACTAGCTC | C  | TGGCATGGTG  |
| chr12 | 107754837 | 107754857 | hsa-mir-619    | - | 1 | AAACATGTCCAGGTCATGGTC   | AAACATGTCC | A  | GGTCATGGTC  |
| chr14 | 65004509  | 65004529  | hsa-mir-625    | + | 1 | AATCTTGCCCTTAAGCTTGTTT  | AATCTTGCCC | T  | TAAGCTTGTTT |
| chr14 | 99645616  | 99645636  | hsa-mir-342    | + | 1 | GAACAAGCTCCCAGCTTGCGC   | GAACAAGCTC | C  | CAGCTTGCGC  |
| chr15 | 87714562  | 87714582  | hsa-mir-9-3    | + | 1 | GAAGTAGTCCTTCACTTGCCA   | GAAGTAGTCC | T  | TCAGTTGCCA  |
| chr17 | 6867195   | 6867215   | hsa-mir-195    | - | 1 | GAGCTTGTGTGGAGCTTGCCA   | GAGCTTGTGT | G  | GAGCTTGCCA  |
| chr17 | 6867195   | 6867215   | hsa-mir-497    | - | 1 | GAGCTTGTGTGGAGCTTGCCA   | GAGCTTGTGT | G  | GAGCTTGCCA  |
| chr17 | 62894812  | 62894832  | hsa-mir-548d-2 | - | 1 | AGGCATGTTTGAGACATGGTG   | AGGCATGTTT | G  | AGACATGGTG  |
| chr19 | 19416092  | 19416112  | hsa-mir-640    | + | 1 | GGACTTGACATGACTTGTTT    | GGACTTGAC  | A  | TGACTTGTTT  |
| chr2  | 47458430  | 47458450  | hsa-mir-559    | + | 1 | GAAGTAGTCCTTAACTAGTTA   | GAAGTAGTCC | T  | TAAGTAGTTA  |
| chr2  | 176720035 | 176720055 | hsa-mir-10b    | + | 1 | TGGCAAGTCCCAGCCATGCCT   | TGGCAAGTCC | C  | AGCCATGCCT  |
| chr20 | 48626478  | 48626498  | hsa-mir-645    | + | 1 | AAACTTGCAATTTGGCATGCTT  | AAACTTGCA  | T  | TGGCATGCTT  |
| chr20 | 61287036  | 61287056  | hsa-mir-124a-3 | + | 1 | ACACATGTTTCGGTGCATGCC   | ACACATGTTT | G  | GTGCATGCC   |
| chr20 | 61287565  | 61287585  | hsa-mir-124a-3 | + | 1 | ACACATGTTTCGGCAGATGCC   | ACACATGTTT | G  | GCACATGCC   |
| chr21 | 36018783  | 36018803  | hsa-mir-802    | + | 1 | TGGCAAGTCTCACCATGTCT    | TGGCAAGTCC | T  | CACCATGTCT  |
| chr22 | 21502508  | 21502528  | hsa-mir-650    | + | 1 | AAGCAAGCTGGAAGCTTGCA    | AAGCAAGCTG | G  | AAGCTTGCA   |
| chr22 | 36579444  | 36579464  | hsa-mir-658    | - | 1 | GGGCATGGTGGCAGCATGCCT   | GGGCATGGTG | G  | CAGCATGCCT  |

|       |           |           |                |   |   |                       |            |   |             |
|-------|-----------|-----------|----------------|---|---|-----------------------|------------|---|-------------|
| chr22 | 36579444  | 36579464  | hsa-mir-659    | - | 1 | GGGCATGGTGGCAGCATGCCT | GGGCATGGTG | G | CAGCATGCCT  |
| chr3  | 44883378  | 44883398  | hsa-mir-564    | + | 1 | CAACATGTTTTGTACTTGCTC | CAACATGTTT | T | GTACTTGCTC  |
| chr3  | 45701348  | 45701368  | hsa-mir-565    | - | 1 | GTGCAAGCTTCTAGCTTGCTT | GTGCAAGCTT | C | TAGCTTGCTT  |
| chr3  | 50183988  | 50184008  | hsa-mir-566    | + | 1 | GGGCATGACCGAGCCATGCC  | GGGCATGACC | G | AGCCATGCC   |
| chr3  | 169752721 | 169752741 | hsa-mir-551b   | + | 1 | GCCCTTGCTCTGGGCTAGTTC | GCCCTTGCTC | T | GGGCTAGTTC  |
| chr4  | 24137649  | 24137669  | hsa-mir-573    | - | 1 | AGACAAGTTTTCAACTTGCT  | AGACAAGTTT | T | CAACTTGCT   |
| chr4  | 115789173 | 115789193 | hsa-mir-577    | + | 1 | GAACAAGCTGTTGACATGTTT | GAACAAGCTG | T | TGACATGTTT  |
| chr5  | 53289222  | 53289242  | hsa-mir-581    | - | 1 | TAACATGGCAAAAGCTTGCT  | TAACATGGCA | A | AAGCTTGCT   |
| chr7  | 25960235  | 25960255  | hsa-mir-148a   | - | 1 | TAGCAAGTTGTAACTAGGTG  | TAGCAAGTTG | T | AACTAGGTG   |
| chr7  | 27178451  | 27178471  | hsa-mir-196b   | - | 1 | TGGCTTGCTGAGAGCAAGCAG | TGGCTTGCTG | A | GAGCAAGCAG  |
| chr7  | 92950051  | 92950071  | hsa-mir-489    | - | 1 | GAACTTGTTTGAAGCTGGTTC | GAACTTGTTT | G | AAGCTGGTTC  |
| chr7  | 92950051  | 92950071  | hsa-mir-653    | - | 1 | GAACTTGTTTGAAGCTGGTTC | GAACTTGTTT | G | AAGCTGGTTC  |
| chr7  | 158027169 | 158027189 | hsa-mir-595    | - | 1 | ACACTTGCTTAAAGCTTGCCG | ACACTTGCTT | A | AAGCTTGCCG  |
| chr7  | 158027332 | 158027352 | hsa-mir-595    | - | 1 | TGGCTAGCATGAGGCTTGTTA | TGGCTAGCAT | G | AGGCTGTTA   |
| chr8  | 1750100   | 1750120   | hsa-mir-596    | + | 1 | AGACATGTTTCAGGCAAGCCA | AGACATGTTT | C | AGGCAAGCCA  |
| chr8  | 1757482   | 1757502   | hsa-mir-596    | + | 1 | AAGCATGTTCTCAGCAAGTGC | AAGCATGTTT | T | CAGCAAGTGC  |
| chr8  | 135882325 | 135882345 | hsa-mir-30b    | - | 1 | AGGCTAGTCACAAACAAGTGA | AGGCTAGTCA | C | AAACAAGTGA  |
| chr8  | 135882325 | 135882345 | hsa-mir-30d    | - | 1 | AGGCTAGTCACAAACAAGTGA | AGGCTAGTCA | C | AAACAAGTGA  |
| chr8  | 145095240 | 145095260 | hsa-mir-661    | - | 1 | AGGCAAGCCCCAACAAGTCC  | AGGCAAGCCC | C | TAACAAGTCC  |
| chr9  | 125210769 | 125210789 | hsa-mir-601    | - | 1 | AAGCTAGCGCCAGGCTAGTCA | AAGCTAGCGC | C | AGGCTAGTCA  |
| chr9  | 130049371 | 130049391 | hsa-mir-199b   | - | 1 | GAGCTGGCCTCAGGCATGTTG | GAGCTGGCCT | C | AGGCATGTTG  |
| chrX  | 65153815  | 65153835  | hsa-mir-223    | + | 1 | AGACTTGCCCAAGCCATGATT | AGACTTGCCC | A | AGCCATGATT  |
| chrX  | 133509307 | 133509327 | hsa-mir-424    | - | 1 | CAACAAGTCACATGCATGCC  | CAACAAGTCA | C | ATGCATGCC   |
| chrX  | 133509307 | 133509327 | hsa-mir-450-1  | - | 1 | CAACAAGTCACATGCATGCC  | CAACAAGTCA | C | ATGCATGCC   |
| chrX  | 133509307 | 133509327 | hsa-mir-450-2  | - | 1 | CAACAAGTCACATGCATGCC  | CAACAAGTCA | C | ATGCATGCC   |
| chrX  | 133509307 | 133509327 | hsa-mir-503    | - | 1 | CAACAAGTCACATGCATGCC  | CAACAAGTCA | C | ATGCATGCC   |
| chrX  | 133509307 | 133509327 | hsa-mir-542    | - | 1 | CAACAAGTCACATGCATGCC  | CAACAAGTCA | C | ATGCATGCC   |
| chrX  | 138841354 | 138841374 | hsa-mir-505    | - | 1 | AGGCAAGGCTGAGTCTTGCCC | AGGCAAGGCT | G | AGTCTTGCCC  |
| chr1  | 149789108 | 149789127 | hsa-mir-554    | + | 0 | CAACATGCCTAGCCAAGTTT  | CAACATGCCT |   | AGCCAAGTTT  |
| chr10 | 134908638 | 134908657 | hsa-mir-202    | - | 0 | GGGCATGTCTTGGAAGCCT   | GGGCATGTCT |   | TGGCAAGCCT  |
| chr12 | 93759345  | 93759364  | hsa-mir-492    | + | 0 | GAACAAGTCAAGGCTAGCTG  | GAACAAGTCA |   | AGGCTAGCTG  |
| chr13 | 89675718  | 89675737  | hsa-mir-622    | + | 0 | GGACAAGCTCCACCTTGCTA  | GGACAAGCTC |   | CACCTTGCTA  |
| chr15 | 77285829  | 77285848  | hsa-mir-184    | + | 0 | GGGCTAGCCTGAGCTTGCCAG | GGGCTAGCCT |   | GAGCTTGCCAG |
| chr15 | 86965541  | 86965560  | hsa-mir-7-2    | + | 0 | GGGCTTGCCCGGCATGTGG   | GGGCTTGCCC |   | GGGCATGTGG  |
| chr16 | 15643104  | 15643123  | hsa-mir-484    | + | 0 | ACACAAGATTAGGCTTGTTT  | ACACAAGATT |   | AGGCTTGTTT  |
| chr16 | 55451027  | 55451046  | hsa-mir-138-2  | + | 0 | TGACTAGTCTTACCTAGCCC  | TGACTAGTCT |   | TACCTAGCCC  |
| chr17 | 25462037  | 25462056  | hsa-mir-423    | + | 0 | AGACAAGTTTTACCATGTTG  | AGACAAGTTT |   | CACCATGTTG  |
| chr19 | 4722866   | 4722885   | hsa-mir-7-3    | + | 0 | GGACAAGTGTGAACTTGTC   | GGACAAGTGT |   | GAACTTGTC   |
| chr19 | 19410794  | 19410813  | hsa-mir-640    | + | 0 | GCACTAGCCACACTTGCTT   | GCACTAGCCC |   | CACTTGCTT   |
| chr19 | 54687819  | 54687838  | hsa-mir-150    | - | 0 | AAGCTTGCTGGAGCAGGCC   | AAGCTTGCTG |   | GAGCAGGCC   |
| chr19 | 58934619  | 58934638  | hsa-mir-516-4  | + | 0 | TGGCATGTCCAACCTAGCCC  | TGGCATGTCC |   | AACCTAGCCC  |
| chr19 | 58934619  | 58934638  | hsa-mir-517c   | + | 0 | TGGCATGTCCAACCTAGCCC  | TGGCATGTCC |   | AACCTAGCCC  |
| chr19 | 58934619  | 58934638  | hsa-mir-518a-1 | + | 0 | TGGCATGTCCAACCTAGCCC  | TGGCATGTCC |   | AACCTAGCCC  |
| chr19 | 58934619  | 58934638  | hsa-mir-518a-2 | + | 0 | TGGCATGTCCAACCTAGCCC  | TGGCATGTCC |   | AACCTAGCCC  |
| chr19 | 58934619  | 58934638  | hsa-mir-518d   | + | 0 | TGGCATGTCCAACCTAGCCC  | TGGCATGTCC |   | AACCTAGCCC  |
| chr19 | 58934619  | 58934638  | hsa-mir-518e   | + | 0 | TGGCATGTCCAACCTAGCCC  | TGGCATGTCC |   | AACCTAGCCC  |

|       |           |           |               |   |   |                        |            |  |             |
|-------|-----------|-----------|---------------|---|---|------------------------|------------|--|-------------|
| chr19 | 58934619  | 58934638  | hsa-mir-520h  | + | 0 | TGGCATGTCCAACCTAGCCC   | TGGCATGTCC |  | AACCTAGCCC  |
| chr19 | 58934619  | 58934638  | hsa-mir-521-1 | + | 0 | TGGCATGTCCAACCTAGCCC   | TGGCATGTCC |  | AACCTAGCCC  |
| chr3  | 35763045  | 35763064  | hsa-mir-128b  | + | 0 | AGTCATGTTTTAACTTGTTT   | AGTCATGTTT |  | TAACCTTGTTT |
| chr3  | 121595431 | 121595450 | hsa-mir-198   | - | 0 | AGGCAAGCTTCAACAAGCCG   | AGGCAAGCTT |  | CAACAAGCCG  |
| chr3  | 189893453 | 189893472 | hsa-mir-28    | + | 0 | AAGCCAGTTATAACTTGTTT   | AAGCCAGTTA |  | TAACCTTGTTT |
| chr4  | 8056822   | 8056841   | hsa-mir-95    | - | 0 | AGACAAGCAGAGACAAGCAC   | AGACAAGCAG |  | AGACAAGCAC  |
| chr4  | 115792084 | 115792103 | hsa-mir-577   | + | 0 | AAGCAAGAACAACCTAGTTT   | AAGCAAGAAC |  | AAACTAGTTT  |
| chr6  | 72134348  | 72134367  | hsa-mir-30c-2 | - | 0 | GGGCTTGCTGGGCATGCC     | GGGCTTGCT  |  | GGGCATGCC   |
| chr7  | 129191509 | 129191528 | hsa-mir-182   | - | 0 | GAACAAGGTCAAACAAGGTC   | GAACAAGGTC |  | AAACAAGGTC  |
| chr8  | 22151406  | 22151425  | hsa-mir-320   | - | 0 | AGGCATGGTGC GG CATGCCT | AGGCATGGTG |  | CGGCATGCCT  |
| chr8  | 141803956 | 141803975 | hsa-mir-151   | - | 0 | TGGCTTGTTTTGGCAAGTTC   | TGGCTTGTTT |  | TGGCAAGTTC  |
| chrX  | 45484890  | 45484909  | hsa-mir-221   | - | 0 | GAACATGCATGCACATGTTT   | GAACATGCAT |  | GCACATGTTT  |
| chrX  | 45484890  | 45484909  | hsa-mir-222   | - | 0 | GAACATGCATGCACATGTTT   | GAACATGCAT |  | GCACATGTTT  |
| chrX  | 49647439  | 49647458  | hsa-mir-188   | + | 0 | AATCATGCCCAAGCTTGATT   | AATCATGCC  |  | AAGCTTGATT  |
| chrX  | 49647439  | 49647458  | hsa-mir-532   | + | 0 | AATCATGCCCAAGCTTGATT   | AATCATGCC  |  | AAGCTTGATT  |
| chrX  | 73422709  | 73422728  | hsa-mir-374   | - | 0 | AAACATGTCTTAGCTGGCTT   | AAACATGTCT |  | TAGCTGGCTT  |
| chrX  | 73422709  | 73422728  | hsa-mir-545   | - | 0 | AAACATGTCTTAGCTGGCTT   | AAACATGTCT |  | TAGCTGGCTT  |
| chrX  | 85045610  | 85045629  | hsa-mir-361   | - | 0 | AGACATGTTTAAGCAAGTGA   | AGACATGTTT |  | AAGCAAGTGA  |
