# Supplementary material for: Dissecting microregulation of a master regulatory network
Source: PubMed Central journal article supplement (PMC2289817; doi:10.1186/1471-2164-9-88), 2008-02-23
Supplement: 1471-2164-9-88-S3.pdf [file 1471-2164-9-88-S3.pdf]

**Additional File 3:** For the known 23 upstream regulators and 48 downstream TFs of p53 (based on p53 Knowledgebase; <http://p53.bii.a-star.edu.sg>), putative miRs regulating them were extracted using MAMI server and the database (<http://mami.med.harvard.edu/>) which has compilation of microRNA targets from five target prediction tools namely, DIANA-microT, miRanda, TargetScanS, miRtarget and PicTar. The last two columns indicate the role of the transcription factor in the p53 network and whether it is upstream or downstream to the p53 network.

| p53-miR        | TargetGene | MAMI score | TargetScanS | miRanda | microT  | miRtarget | picTar | Role in p53 network                     | Upstream/Downstream to p53 |
|----------------|------------|------------|-------------|---------|---------|-----------|--------|-----------------------------------------|----------------------------|
| hsa-miR-124a   | EGR1       | 0.11277    | 0.87        | -1      | -2      | -1        | -2     | Activator                               | Upstream                   |
| hsa-miR-181c   | EGR1       | 0.11277    | 0.932       | -1      | -2      | -1        | -1     | Activator                               | Upstream                   |
| hsa-miR-183    | EGR1       | 0.35292    | 0.81        | 0.99798 | -2      | 0.0073    | -2     | Activator                               | Upstream                   |
| hsa-miR-192    | EGR1       | 0.14584    | -1          | -1      | -2      | 0.00365   | -1     | Activator                               | Upstream                   |
| hsa-miR-203    | EGR1       | 0.11277    | 0.53        | -1      | -2      | -1        | -2     | Activator                               | Upstream                   |
| hsa-miR-23a    | EGR1       | 0.11277    | 0.56        | -1      | -2      | -1        | -1     | Activator                               | Upstream                   |
| hsa-miR-518b   | EGR1       | 0.09432    | -2          | 0.9272  | -2      | -1        | -2     | Activator                               | Upstream                   |
| hsa-miR-518c   | EGR1       | 0.09432    | -2          | 0.9272  | -2      | -1        | -2     | Activator                               | Upstream                   |
| hsa-miR-518d   | EGR1       | 0.09432    | -2          | 0.9272  | -2      | -1        | -2     | Activator                               | Upstream                   |
| hsa-miR-124a   | SP1        | 0.11277    | 0.962       | -2      | -2      | -2        | -2     | Activator                               | Upstream                   |
| hsa-miR-125b   | SP1        | 0.11277    | 0.71        | -2      | -2      | -2        | -2     | Activator                               | Upstream                   |
| hsa-miR-128b   | SP1        | 0.11277    | 0.939       | -2      | -2      | -2        | -2     | Activator                               | Upstream                   |
| hsa-miR-135a   | SP1        | 0.11277    | 0.74        | -2      | -2      | -2        | -2     | Activator                               | Upstream                   |
| hsa-miR-135b   | SP1        | 0.11277    | 0.74        | -2      | -2      | -2        | -2     | Activator                               | Upstream                   |
| hsa-miR-24     | SP1        | 0.11277    | 0.6         | -2      | -2      | -2        | -2     | Activator                               | Upstream                   |
| hsa-miR-33     | SP1        | 0.11277    | 0.55        | -2      | -2      | -2        | -2     | Activator                               | Upstream                   |
| hsa-miR-196a   | HOXA5      | 0.11277    | 0.82        | -1      | -1      | -1        | -2     | Activator                               | Upstream                   |
| hsa-miR-196b   | HOXA5      | 0.11277    | 0.82        | -1      | -1      | -1        | -2     | Activator                               | Upstream                   |
| hsa-miR-26b    | HOXA5      | 0.2586     | 0.82        | -1      | -1      | 0.0219    | -2     | Activator                               | Upstream                   |
| hsa-miR-27a    | HOXA5      | 0.11277    | 0.64        | -1      | -1      | -1        | -2     | Activator                               | Upstream                   |
| hsa-miR-376a   | HOXA5      | 0.50875    | -2          | 0.99778 | 0.22562 | -1        | -2     | Activator                               | Upstream                   |
| hsa-miR-376b   | HOXA5      | 0.50875    | -2          | 0.99778 | 0.18138 | -1        | -2     | Activator                               | Upstream                   |
| hsa-miR-484    | HOXA5      | 0.14584    | -2          | -2      | -1      | 0.01095   | -2     | Activator                               | Upstream                   |
| hsa-miR-96     | HOXA5      | 0.2586     | 0.77        | -1      | -1      | 0.0146    | -2     | Activator                               | Upstream                   |
| hsa-miR-101    | YY1        | 0.09432    | -1          | 0.70774 | -2      | -2        | -1     | Activator                               | Upstream                   |
| hsa-miR-181c   | YY1        | 0.11277    | 0.88        | -1      | -1      | -2        | -1     | Activator                               | Upstream                   |
| hsa-miR-200a   | YY1        | 0.11277    | 0.48        | -1      | -1      | -2        | -2     | Activator                               | Upstream                   |
| hsa-miR-29a    | YY1        | 0.41443    | -2          | -1      | 0.37604 | -2        | -1     | Activator                               | Upstream                   |
| hsa-miR-34a    | YY1        | 0.11277    | 0.65        | -1      | -1      | -2        | -2     | Activator                               | Upstream                   |
| hsa-miR-384    | YY1        | 0.09432    | -2          | 0.51585 | -1      | -2        | -2     | Activator                               | Upstream                   |
| hsa-miR-511    | YY1        | 0.09432    | -2          | 0.64718 | -2      | -2        | -2     | Activator                               | Upstream                   |
| hsa-miR-346    | NFIC       | 0.09432    | -2          | 0.85331 | -2      | -2        | -2     | Activator                               | Upstream                   |
| hsa-miR-30a-3p | NFKB1      | 0.09432    | -2          | 0.53885 | -2      | -2        | -1     | Activator                               | Upstream                   |
| hsa-miR-508    | NFKB1      | 0.09432    | -2          | 0.79507 | -2      | -2        | -2     | Activator                               | Upstream                   |
| hsa-miR-9      | NFKB1      | 0.11277    | 0.81        | -2      | -2      | -2        | -2     | Activator                               | Upstream                   |
| hsa-miR-125b   | USF1       | 0.09432    | -2          | 0.10515 | -2      | -2        | -2     | Activator                               | Upstream                   |
| hsa-miR-296    | USF1       | 0.09432    | -2          | 0.73209 | -2      | -2        | -2     | Activator                               | Upstream                   |
| hsa-let-7a     | MYC        | 0.09432    | -2          | 0.98208 | -2      | -2        | -2     | Activator                               | Upstream                   |
| hsa-let-7b     | MYC        | 0.09432    | -2          | 0.98208 | -2      | -2        | -2     | Activator                               | Upstream                   |
| hsa-let-7f     | MYC        | 0.09432    | -2          | 0.98208 | -2      | -2        | -2     | Activator                               | Upstream                   |
| hsa-let-7i     | MYC        | 0.09432    | -2          | 0.98208 | -2      | -2        | -2     | Activator                               | Upstream                   |
| hsa-miR-155    | MYC        | 0.09432    | -2          | 0.21942 | -2      | -2        | -2     | Activator                               | Upstream                   |
| hsa-miR-196a   | MYC        | 0.09432    | -2          | 0.98528 | -2      | -2        | -2     | Activator                               | Upstream                   |
| hsa-miR-196b   | MYC        | 0.09432    | -2          | 0.98528 | -2      | -2        | -2     | Activator                               | Upstream                   |
| hsa-miR-200b   | MYC        | 0.09432    | -2          | 0.37261 | -2      | -2        | -2     | Activator                               | Upstream                   |
| hsa-miR-200c   | MYC        | 0.09432    | -2          | 0.37261 | -2      | -2        | -2     | Activator                               | Upstream                   |
| hsa-miR-429    | MYC        | 0.09432    | -2          | 0.02147 | -2      | -2        | -2     | Activator                               | Upstream                   |
| hsa-miR-98     | MYC        | 0.09432    | -2          | 0.9952  | -2      | -2        | -2     | Activator                               | Upstream                   |
| hsa-miR-33     | MAX        | 0.11277    | 0.51        | -2      | -1      | -2        | -1     | Activator                               | Upstream                   |
| hsa-miR-200a   | JUN        | 0.11277    | 0.53        | -1      | -1      | -2        | -2     | Cell-type specific activator/ repressor | Upstream                   |
| hsa-miR-200b   | JUN        | 0.41443    | -1          | -1      | 0.17254 | -2        | -1     | Cell-type specific activator/ repressor | Upstream                   |
| hsa-miR-32     | JUN        | 0.11277    | 0.85        | -1      | -1      | -2        | -2     | Cell-type specific activator/ repressor | Upstream                   |
| hsa-miR-495    | JUN        | 0.09432    | -2          | 0.93878 | -2      | -2        | -2     | Cell-type specific activator/ repressor | Upstream                   |
| hsa-miR-92     | JUN        | 0.11277    | 0.85        | -1      | -1      | -2        | -2     | Cell-type specific activator/ repressor | Upstream                   |
| hsa-miR-101    | FOS        | 0.35292    | 0.86        | 0.99887 | -2      | 0.01095   | -2     | Cell-type specific activator/ repressor | Upstream                   |
| hsa-miR-181c   | FOS        | 0.35292    | 0.63        | 0.99588 | -1      | 0.01095   | -2     | Cell-type specific activator/ repressor | Upstream                   |
| hsa-miR-221    | FOS        | 0.11277    | 0.8         | -1      | -1      | -1        | -2     | Cell-type specific activator/ repressor | Upstream                   |
| hsa-miR-222    | FOS        | 0.20708    | 0.8         | 0.8804  | -1      | -1        | -2     | Cell-type specific activator/ repressor | Upstream                   |
| hsa-miR-29a    | FOS        | 0.09432    | -2          | 0.97906 | -1      | -1        | -1     | Cell-type specific activator/ repressor | Upstream                   |
| hsa-miR-29b    | FOS        | 0.09432    | -2          | 0.97906 | -1      | -1        | -2     | Cell-type specific activator/ repressor | Upstream                   |
| hsa-miR-29c    | FOS        | 0.09432    | -2          | 0.97906 | -1      | -1        | -2     | Cell-type specific activator/ repressor | Upstream                   |
| hsa-miR-509    | FOS        | 0.09432    | -2          | 0.13106 | -2      | -1        | -2     | Cell-type specific activator/ repressor | Upstream                   |
| hsa-miR-7      | FOS        | 0.09432    | -1          | 0.95869 | -1      | -1        | -1     | Cell-type specific activator/ repressor | Upstream                   |
| hsa-miR-106a   | BCL6       | 0.11277    | 0.49        | -1      | -2      | -2        | -2     | Repressor                               | Upstream                   |
| hsa-miR-10a    | BCL6       | 0.20708    | 0.66        | 0.62379 | -2      | -2        | -2     | Repressor                               | Upstream                   |
| hsa-miR-10b    | BCL6       | 0.11277    | 0.66        | -1      | -2      | -2        | -2     | Repressor                               | Upstream                   |
| hsa-miR-124a   | BCL6       | 0.11277    | 0.85        | -1      | -2      | -2        | -1     | Repressor                               | Upstream                   |
| hsa-miR-129    | BCL6       | 0.09432    | -2          | 0.93663 | -2      | -2        | -2     | Repressor                               | Upstream                   |
| hsa-miR-181c   | BCL6       | 0.11277    | 0.907       | -1      | -2      | -2        | -2     | Repressor                               | Upstream                   |
| hsa-miR-183    | BCL6       | 0.11277    | 0.6         | -1      | -2      | -2        | -2     | Repressor                               | Upstream                   |
| hsa-miR-20b    | BCL6       | 0.11277    | 0.49        | -1      | -2      | -2        | -2     | Repressor                               | Upstream                   |
| hsa-miR-26b    | BCL6       | 0.11277    | 0.64        | -1      | -2      | -2        | -2     | Repressor                               | Upstream                   |
| hsa-miR-30b    | BCL6       | 0.11277    | 0.901       | -1      | -2      | -2        | -2     | Repressor                               | Upstream                   |
| hsa-miR-30c    | BCL6       | 0.11277    | 0.901       | -1      | -2      | -2        | -2     | Repressor                               | Upstream                   |
| hsa-miR-30d    | BCL6       | 0.11277    | 0.901       | -1      | -2      | -2        | -1     | Repressor                               | Upstream                   |
| hsa-miR-346    | BCL6       | 0.09432    | -2          | 0.72746 | -2      | -2        | -2     | Repressor                               | Upstream                   |
| hsa-miR-34a    | BCL6       | 0.11277    | 0.67        | -1      | -2      | -2        | -2     | Repressor                               | Upstream                   |
| hsa-miR-372    | BCL6       | 0.11277    | 0.68        | -1      | -2      | -2        | -1     | Repressor                               | Upstream                   |
| hsa-miR-373    | BCL6       | 0.11277    | 0.68        | -1      | -2      | -2        | -2     | Repressor                               | Upstream                   |
| hsa-miR-520b   | BCL6       | 0.09432    | -2          | 0.5253  | -2      | -2        | -2     | Repressor                               | Upstream                   |
| hsa-miR-520c   | BCL6       | 0.09432    | -2          | 0.5253  | -2      | -2        | -2     | Repressor                               | Upstream                   |
| hsa-miR-520d   | BCL6       | 0.09432    | -2          | 0.5253  | -2      | -2        | -2     | Repressor                               | Upstream                   |
| hsa-miR-520f   | BCL6       | 0.09432    | -2          | 0.5253  | -2      | -2        | -2     | Repressor                               | Upstream                   |
| hsa-miR-9      | BCL6       | 0.11277    | 0.79        | -2      | -2      | -2        | -2     | Repressor                               | Upstream                   |
| hsa-miR-135a   | ATF3       | 0.11277    | 0.78        | -1      | -2      | -1        | -2     | Repressor                               | Upstream                   |

|                |        |         |       |         |         |         |    |                 |            |
|----------------|--------|---------|-------|---------|---------|---------|----|-----------------|------------|
| hsa-miR-135b   | ATF3   | 0.11277 | 0.78  | -1      | -2      | -1      | -2 | Repressor       | Upstream   |
| hsa-miR-192    | ATF3   | 0.09432 | -1    | 0.69078 | -2      | -1      | -1 | Repressor       | Upstream   |
| hsa-miR-30d    | ATF3   | 0.09432 | -1    | 0.89288 | -2      | -1      | -1 | Repressor       | Upstream   |
| hsa-miR-107    | KLF4   | 0.11277 | 0.57  | -1      | -1      | -1      | -1 | Repressor       | Upstream   |
| hsa-miR-10a    | KLF4   | 0.11277 | 0.52  | -1      | -1      | -1      | -2 | Repressor       | Upstream   |
| hsa-miR-10b    | KLF4   | 0.11277 | 0.52  | -1      | -1      | -1      | -2 | Repressor       | Upstream   |
| hsa-miR-124a   | KLF4   | 0.2586  | 0.78  | -1      | -1      | 0.00365 | -2 | Repressor       | Upstream   |
| hsa-miR-128b   | KLF4   | 0.11277 | 0.77  | -1      | -1      | -1      | -2 | Repressor       | Upstream   |
| hsa-miR-135a   | KLF4   | 0.11277 | 0.71  | -1      | -1      | -1      | -2 | Repressor       | Upstream   |
| hsa-miR-135b   | KLF4   | 0.11277 | 0.71  | -1      | -1      | -1      | -2 | Repressor       | Upstream   |
| hsa-miR-148a   | KLF4   | 0.76735 | 0.76  | 0.80599 | 0.33622 | 0.0073  | -2 | Repressor       | Upstream   |
| hsa-miR-200b   | KLF4   | 0.11277 | 0.68  | -1      | -1      | -1      | -1 | Repressor       | Upstream   |
| hsa-miR-200c   | KLF4   | 0.11277 | 0.68  | -1      | -1      | -1      | -2 | Repressor       | Upstream   |
| hsa-miR-26b    | KLF4   | 0.11277 | 0.69  | -1      | -1      | -1      | -2 | Repressor       | Upstream   |
| hsa-miR-32     | KLF4   | 0.35292 | 0.982 | 0.92963 | -1      | 0.01095 | -2 | Repressor       | Upstream   |
| hsa-miR-34a    | KLF4   | 0.2586  | 0.68  | -1      | -1      | 0.00365 | -2 | Repressor       | Upstream   |
| hsa-miR-449    | KLF4   | 0.14584 | -2    | -1      | -1      | 0.01825 | -2 | Repressor       | Upstream   |
| hsa-miR-508    | KLF4   | 0.24015 | -2    | 0.48935 | -2      | 0.00011 | -2 | Repressor       | Upstream   |
| hsa-miR-7      | KLF4   | 0.2586  | 0.87  | -1      | -1      | 0.0876  | -2 | Repressor       | Upstream   |
| hsa-miR-92     | KLF4   | 0.11277 | 0.982 | -1      | -1      | -1      | -2 | Repressor       | Upstream   |
| hsa-miR-153    | PAX2   | 0.11277 | 0.85  | -1      | -2      | -2      | -2 | Repressor       | Upstream   |
| hsa-miR-138    | PAX8   | 0.09432 | -1    | 0.15986 | -2      | -1      | -1 | Repressor       | Upstream   |
| hsa-miR-326    | PAX8   | 0.14584 | -2    | -1      | -2      | 0.0292  | -2 | Repressor       | Upstream   |
| hsa-miR-124a   | ETS1   | 0.11277 | 0.83  | -1      | -2      | -1      | -2 | Uncharacterized | Upstream   |
| hsa-miR-125b   | ETS1   | 0.11277 | 0.84  | -1      | -2      | -1      | -2 | Uncharacterized | Upstream   |
| hsa-miR-155    | ETS1   | 0.11277 | 0.7   | -1      | -2      | -1      | -2 | Uncharacterized | Upstream   |
| hsa-miR-181c   | ETS1   | 0.11277 | 0.79  | -1      | -2      | -1      | -2 | Uncharacterized | Upstream   |
| hsa-miR-199a   | ETS1   | 0.11277 | 0.89  | -2      | -2      | -1      | -2 | Uncharacterized | Upstream   |
| hsa-miR-199b   | ETS1   | 0.11277 | 0.89  | -1      | -2      | -1      | -2 | Uncharacterized | Upstream   |
| hsa-miR-200b   | ETS1   | 0.11277 | 0.78  | -1      | -2      | -1      | -1 | Uncharacterized | Upstream   |
| hsa-miR-200c   | ETS1   | 0.11277 | 0.78  | -1      | -2      | -1      | -1 | Uncharacterized | Upstream   |
| hsa-miR-214    | ETS1   | 0.14584 | -2    | -1      | -2      | 0.0073  | -1 | Uncharacterized | Upstream   |
| hsa-miR-221    | ETS1   | 0.11277 | 0.74  | -1      | -2      | -1      | -2 | Uncharacterized | Upstream   |
| hsa-miR-222    | ETS1   | 0.11277 | 0.74  | -1      | -2      | -1      | -2 | Uncharacterized | Upstream   |
| hsa-miR-9      | ETS1   | 0.11277 | 0.85  | -2      | -2      | -1      | -2 | Uncharacterized | Upstream   |
| hsa-miR-199a   | ETS2   | 0.11277 | 0.78  | -2      | -2      | -2      | -1 | Uncharacterized | Upstream   |
| hsa-miR-199b   | ETS2   | 0.11277 | 0.78  | -1      | -2      | -2      | -1 | Uncharacterized | Upstream   |
| hsa-miR-203    | ETS2   | 0.11277 | 0.68  | -1      | -2      | -2      | -2 | Uncharacterized | Upstream   |
| hsa-miR-221    | ETS2   | 0.11277 | 0.906 | -1      | -2      | -2      | -2 | Uncharacterized | Upstream   |
| hsa-miR-222    | ETS2   | 0.11277 | 0.906 | -1      | -2      | -2      | -2 | Uncharacterized | Upstream   |
| hsa-miR-155    | CEBPB  | 0.62151 | 0.78  | 0.71117 | 0.24774 | -1      | -2 | Uncharacterized | Upstream   |
| hsa-miR-342    | CEBPB  | 0.09432 | -2    | 0.80788 | -1      | -1      | -1 | Uncharacterized | Upstream   |
| hsa-miR-510    | CEBPB  | 0.14584 | -2    | -1      | -2      | 0.01825 | -2 | Uncharacterized | Upstream   |
| hsa-miR-29b    | BAX    | 0.09432 | -2    | 0.16613 | -2      | -2      | -2 | activator       | Downstream |
| hsa-miR-29c    | BAX    | 0.09432 | -2    | 0.16613 | -2      | -2      | -2 | activator       | Downstream |
| hsa-miR-148a   | BBC3   | 0.09432 | -2    | 0.72848 | -2      | -2      | -2 | activator       | Downstream |
| hsa-miR-296    | BBC3   | 0.09432 | -2    | 0.8104  | -2      | -2      | -2 | activator       | Downstream |
| hsa-miR-210    | BDKRB2 | 0.09432 | -2    | 0.37001 | -2      | -2      | -2 | activator       | Downstream |
| hsa-let-7a     | BTG2   | 0.11277 | 0.84  | -1      | -1      | -2      | -2 | activator       | Downstream |
| hsa-let-7b     | BTG2   | 0.11277 | 0.84  | -1      | -1      | -2      | -2 | activator       | Downstream |
| hsa-let-7f     | BTG2   | 0.11277 | 0.84  | -1      | -1      | -2      | -2 | activator       | Downstream |
| hsa-let-7i     | BTG2   | 0.11277 | 0.84  | -1      | -1      | -2      | -2 | activator       | Downstream |
| hsa-miR-106a   | BTG2   | 0.11277 | 0.56  | -1      | -1      | -2      | -2 | activator       | Downstream |
| hsa-miR-107    | BTG2   | 0.11277 | 0.72  | -1      | -1      | -2      | -2 | activator       | Downstream |
| hsa-miR-124a   | BTG2   | 0.11277 | 0.84  | -1      | -1      | -2      | -1 | activator       | Downstream |
| hsa-miR-128b   | BTG2   | 0.11277 | 0.72  | -1      | -1      | -2      | -2 | activator       | Downstream |
| hsa-miR-195    | BTG2   | 0.11277 | 0.92  | -1      | -1      | -2      | -2 | activator       | Downstream |
| hsa-miR-20b    | BTG2   | 0.11277 | 0.56  | -1      | -2      | -2      | -2 | activator       | Downstream |
| hsa-miR-27a    | BTG2   | 0.62151 | 0.963 | 0.86604 | 0.4424  | -2      | -2 | activator       | Downstream |
| hsa-miR-32     | BTG2   | 0.20708 | 0.988 | 0.987   | -1      | -2      | -2 | activator       | Downstream |
| hsa-miR-9      | BTG2   | 0.11277 | 0.77  | -2      | -1      | -2      | -2 | activator       | Downstream |
| hsa-miR-92     | BTG2   | 0.11277 | 0.988 | -1      | -1      | -2      | -2 | activator       | Downstream |
| hsa-miR-98     | BTG2   | 0.11277 | 0.84  | -1      | -1      | -2      | -2 | activator       | Downstream |
| hsa-miR-122a   | CCNG1  | 0.35292 | 0.7   | 0.96174 | -2      | 0.00365 | -2 | activator       | Downstream |
| hsa-miR-181d   | CCNG1  | 0.14584 | -2    | -1      | -2      | 0.0073  | -2 | activator       | Downstream |
| hsa-miR-203    | CCNG1  | 0.11277 | 0.63  | -1      | -2      | -1      | -2 | activator       | Downstream |
| hsa-miR-23a    | CCNG1  | 0.11277 | 0.75  | -1      | -2      | -1      | -2 | activator       | Downstream |
| hsa-miR-27a    | CCNG1  | 0.2586  | 0.82  | -1      | -2      | 0.00001 | -2 | activator       | Downstream |
| hsa-miR-510    | CCNG1  | 0.14584 | -2    | -1      | -2      | 0.0073  | -2 | activator       | Downstream |
| hsa-miR-9      | CCNG1  | 0.11277 | 0.86  | -2      | -2      | -1      | -2 | activator       | Downstream |
| hsa-miR-106a   | CDKN1A | 0.11277 | 0.82  | -1      | -2      | -2      | -2 | activator       | Downstream |
| hsa-miR-124a   | CDKN1A | 0.09432 | -1    | 0.88139 | -2      | -2      | -2 | activator       | Downstream |
| hsa-miR-20b    | CDKN1A | 0.11277 | 0.82  | -1      | -2      | -2      | -2 | activator       | Downstream |
| hsa-miR-296    | CDKN1A | 0.09432 | -2    | 0.80043 | -2      | -2      | -2 | activator       | Downstream |
| hsa-miR-24     | CTSD   | 0.09432 | -2    | 0.86131 | -2      | -2      | -2 | activator       | Downstream |
| hsa-miR-326    | CTSD   | 0.09432 | -2    | 0.57473 | -2      | -2      | -2 | activator       | Downstream |
| hsa-miR-331    | CTSD   | 0.09432 | -2    | 0.45511 | -2      | -2      | -2 | activator       | Downstream |
| hsa-miR-96     | CTSD   | 0.09432 | -2    | 0.00085 | -2      | -2      | -2 | activator       | Downstream |
| hsa-miR-195    | CX3CL1 | 0.11277 | 0.74  | -2      | -2      | -1      | -2 | activator       | Downstream |
| hsa-miR-296    | CX3CL1 | 0.14584 | -2    | -2      | -2      | 0.04015 | -2 | activator       | Downstream |
| hsa-miR-326    | CX3CL1 | 0.14584 | -2    | -2      | -2      | 0.05475 | -1 | activator       | Downstream |
| hsa-miR-331    | CX3CL1 | 0.14584 | -2    | -2      | -2      | 0.03285 | -1 | activator       | Downstream |
| hsa-miR-424    | CX3CL1 | 0.14584 | -2    | -2      | -2      | 0.00365 | -2 | activator       | Downstream |
| hsa-miR-497    | CX3CL1 | 0.14584 | -2    | -2      | -2      | 0.00001 | -2 | activator       | Downstream |
| hsa-miR-504    | CX3CL1 | 0.14584 | -2    | -2      | -2      | 0.0073  | -2 | activator       | Downstream |
| hsa-miR-516-3p | CX3CL1 | 0.14584 | -2    | -2      | -2      | 0.1314  | -2 | activator       | Downstream |
| hsa-miR-101    | DKK1   | 0.09432 | -1    | 0.7591  | -2      | -2      | -1 | activator       | Downstream |
| hsa-miR-148a   | DKK1   | 0.09432 | -1    | 0.63777 | -2      | -2      | -1 | activator       | Downstream |
| hsa-miR-372    | DKK1   | 0.11277 | 0.69  | -1      | -2      | -2      | -1 | activator       | Downstream |
| hsa-miR-373    | DKK1   | 0.11277 | 0.69  | -1      | -2      | -2      | -2 | activator       | Downstream |
| hsa-miR-502    | DKK1   | 0.09432 | -2    | 0.13733 | -2      | -2      | -2 | activator       | Downstream |

|                |          |         |       |         |         |         |         |           |            |
|----------------|----------|---------|-------|---------|---------|---------|---------|-----------|------------|
| hsa-miR-106a   | EEF1A1   | 0.09432 | -1    | 0.90109 | -2      | -2      | -2      | activator | Downstream |
| hsa-miR-20b    | EEF1A1   | 0.09432 | -1    | 0.91682 | -2      | -2      | -1      | activator | Downstream |
| hsa-miR-33     | EEF1A1   | 0.20708 | 0.59  | 0.99884 | -2      | -2      | -2      | activator | Downstream |
| hsa-miR-373    | EEF1A1   | 0.09432 | -1    | 0.04632 | -2      | -2      | -2      | activator | Downstream |
| hsa-miR-450    | EEF1A1   | 0.09432 | -2    | 1       | -2      | -2      | -2      | activator | Downstream |
| hsa-miR-519d   | EEF1A1   | 0.09432 | -2    | 0.93204 | -2      | -2      | -2      | activator | Downstream |
| hsa-miR-520a   | EEF1A1   | 0.09432 | -2    | 0.92994 | -2      | -2      | -2      | activator | Downstream |
| hsa-miR-520b   | EEF1A1   | 0.09432 | -2    | 0.92994 | -2      | -2      | -2      | activator | Downstream |
| hsa-miR-520c   | EEF1A1   | 0.09432 | -2    | 0.92994 | -2      | -2      | -2      | activator | Downstream |
| hsa-miR-520d   | EEF1A1   | 0.09432 | -2    | 0.92994 | -2      | -2      | -2      | activator | Downstream |
| hsa-miR-520g   | EEF1A1   | 0.09432 | -2    | 0.92994 | -2      | -2      | -2      | activator | Downstream |
| hsa-miR-520h   | EEF1A1   | 0.09432 | -2    | 0.92994 | -2      | -2      | -2      | activator | Downstream |
| hsa-miR-128b   | EGFR     | 0.11277 | 0.78  | -1      | -2      | -2      | -2      | activator | Downstream |
| hsa-miR-7      | EGFR     | 0.09432 | -1    | 0.33018 | -2      | -2      | -1      | activator | Downstream |
| hsa-let-7a     | FAS      | 0.14584 | -1    | -2      | -2      | 0.00001 | -2      | activator | Downstream |
| hsa-let-7b     | FAS      | 0.14584 | -1    | -2      | -2      | 0.00001 | -2      | activator | Downstream |
| hsa-let-7f     | FAS      | 0.14584 | -1    | -2      | -2      | 0.00001 | -2      | activator | Downstream |
| hsa-let-7i     | FAS      | 0.14584 | -1    | -2      | -2      | 0.00365 | -2      | activator | Downstream |
| hsa-miR-196a   | FAS      | 0.14584 | -1    | -2      | -2      | 0.01095 | -2      | activator | Downstream |
| hsa-miR-196b   | FAS      | 0.14584 | -1    | -2      | -2      | 0.01095 | -2      | activator | Downstream |
| hsa-miR-23a    | FAS      | 0.11277 | 0.73  | -2      | -2      | -1      | -2      | activator | Downstream |
| hsa-miR-98     | FAS      | 0.14584 | -1    | -2      | -2      | 0.00001 | -2      | activator | Downstream |
| hsa-miR-148a   | GADD45A  | 0.11277 | 0.74  | -1      | -2      | -1      | -2      | activator | Downstream |
| hsa-miR-326    | GADD45A  | 0.09432 | -2    | 0.3844  | -2      | -1      | -1      | activator | Downstream |
| hsa-miR-362    | GADD45A  | 0.14584 | -2    | -1      | -2      | 0.00001 | -2      | activator | Downstream |
| hsa-miR-374    | GADD45A  | 0.09432 | -2    | 0.90809 | -2      | -1      | -2      | activator | Downstream |
| hsa-miR-502    | GADD45A  | 0.24015 | -2    | 0.85312 | -2      | 0.00365 | -2      | activator | Downstream |
| hsa-miR-19b    | IGFBP3   | 0.20708 | 0.82  | 0.65905 | -1      | -1      | -2      | activator | Downstream |
| hsa-miR-34a    | IGFBP3   | 0.11277 | 0.75  | -1      | -1      | -1      | -2      | activator | Downstream |
| hsa-miR-449    | IGFBP3   | 0.41443 | -2    | -1      | 0.34507 | -1      | -2      | activator | Downstream |
| hsa-miR-495    | IGFBP3   | 0.14584 | -2    | -1      | -2      | 0.00365 | -2      | activator | Downstream |
| hsa-miR-153    | MDM2     | 0.09432 | -2    | 0.89457 | -2      | -2      | -2      | activator | Downstream |
| hsa-miR-23a    | MET      | 0.11277 | 0.86  | -1      | -2      | -2      | -2      | activator | Downstream |
| hsa-miR-34a    | MET      | 0.11277 | 0.94  | -1      | -2      | -2      | -2      | activator | Downstream |
| hsa-miR-29a    | MMP2     | 0.24015 | -2    | 0.96138 | -2      | 0.04745 | -1      | activator | Downstream |
| hsa-miR-29b    | MMP2     | 0.24015 | -2    | 0.96138 | -2      | 0.04745 | -2      | activator | Downstream |
| hsa-miR-29c    | MMP2     | 0.24015 | -2    | 0.96138 | -2      | 0.04745 | -2      | activator | Downstream |
| hsa-miR-519b   | MMP2     | 0.14584 | -2    | -1      | -2      | 0.00365 | -2      | activator | Downstream |
| hsa-miR-519c   | MMP2     | 0.09432 | -2    | 0.9005  | -2      | -1      | -2      | activator | Downstream |
| hsa-miR-520g   | MMP2     | 0.14584 | -2    | -1      | -2      | 0.00001 | -2      | activator | Downstream |
| hsa-miR-520h   | MMP2     | 0.14584 | -2    | -1      | -2      | 0.00001 | -2      | activator | Downstream |
| hsa-let-7i     | PCBP4    | 0.09432 | -1    | 0.64792 | -2      | -2      | -2      | activator | Downstream |
| hsa-miR-195    | PCBP4    | 0.11277 | 0.72  | -1      | -2      | -2      | -2      | activator | Downstream |
| hsa-miR-296    | PCBP4    | 0.09432 | -2    | 0.82996 | -2      | -2      | -2      | activator | Downstream |
| hsa-miR-331    | PCBP4    | 0.09432 | -2    | 0.82314 | -2      | -2      | -2      | activator | Downstream |
| hsa-miR-128b   | PLK2     | 0.58557 | 0.88  | 0.99318 | -1      | 0.01825 | 0.52516 | activator | Downstream |
| hsa-miR-200b   | PLK2     | 0.35292 | 0.66  | 0.90382 | -1      | 0.01095 | -1      | activator | Downstream |
| hsa-miR-200c   | PLK2     | 0.35292 | 0.66  | 0.90382 | -1      | 0.0146  | -1      | activator | Downstream |
| hsa-miR-214    | PLK2     | 0.14584 | -2    | -1      | -1      | 0.0365  | -1      | activator | Downstream |
| hsa-miR-27a    | PLK2     | 0.58557 | 0.979 | 0.9921  | -1      | 0.2993  | 0.52516 | activator | Downstream |
| hsa-miR-320    | PLK2     | 0.14584 | -2    | -1      | -1      | 0.01825 | -1      | activator | Downstream |
| hsa-miR-500    | PLK2     | 0.09432 | -2    | 0.1563  | -2      | -1      | -2      | activator | Downstream |
| hsa-miR-516-3p | PLK2     | 0.14584 | -2    | -1      | -2      | 0.0073  | -2      | activator | Downstream |
| hsa-miR-520c   | PLK2     | 0.09432 | -2    | 0.97028 | -2      | -1      | -2      | activator | Downstream |
| hsa-let-7a     | RB1      | 0.11277 | 0.83  | -1      | -2      | -1      | -2      | activator | Downstream |
| hsa-let-7b     | RB1      | 0.11277 | 0.83  | -1      | -2      | -1      | -2      | activator | Downstream |
| hsa-let-7f     | RB1      | 0.11277 | 0.83  | -1      | -2      | -1      | -2      | activator | Downstream |
| hsa-let-7i     | RB1      | 0.11277 | 0.83  | -1      | -2      | -1      | -2      | activator | Downstream |
| hsa-miR-106a   | RB1      | 0.11277 | 0.8   | -1      | -2      | -1      | -2      | activator | Downstream |
| hsa-miR-192    | RB1      | 0.20708 | 0.8   | 0.85928 | -2      | -1      | -2      | activator | Downstream |
| hsa-miR-20b    | RB1      | 0.11277 | 0.8   | -1      | -2      | -1      | -2      | activator | Downstream |
| hsa-miR-33     | RB1      | 0.11277 | 0.57  | -1      | -2      | -1      | -1      | activator | Downstream |
| hsa-miR-520g   | RB1      | 0.09432 | -2    | 0.8472  | -2      | -1      | -2      | activator | Downstream |
| hsa-miR-520h   | RB1      | 0.09432 | -2    | 0.8472  | -2      | -1      | -2      | activator | Downstream |
| hsa-miR-525    | RB1      | 0.14584 | -2    | -2      | -2      | 0.1533  | -2      | activator | Downstream |
| hsa-miR-7      | RB1      | 0.11277 | 0.51  | -1      | -2      | -1      | -2      | activator | Downstream |
| hsa-miR-98     | RB1      | 0.11277 | 0.83  | -1      | -2      | -1      | -2      | activator | Downstream |
| hsa-miR-95     | S100A2   | 0.09432 | -2    | 0.0489  | -2      | -2      | -2      | activator | Downstream |
| hsa-miR-181c   | SERPINE1 | 0.09432 | -1    | 0.39391 | -1      | -1      | -1      | activator | Downstream |
| hsa-miR-181d   | SERPINE1 | 0.09432 | -2    | 0.39391 | -2      | -1      | -2      | activator | Downstream |
| hsa-miR-30b    | SERPINE1 | 0.76735 | 0.82  | 0.72721 | 0.43798 | 0.0292  | -2      | activator | Downstream |
| hsa-miR-30c    | SERPINE1 | 0.76735 | 0.82  | 0.72721 | 0.5353  | 0.0292  | -2      | activator | Downstream |
| hsa-miR-30d    | SERPINE1 | 0.11277 | 0.82  | -1      | -1      | -1      | -2      | activator | Downstream |
| hsa-miR-34a    | SERPINE1 | 0.2586  | 0.75  | -1      | -1      | 0.04015 | -2      | activator | Downstream |
| hsa-miR-449    | SERPINE1 | 0.14584 | -2    | -1      | -1      | 0.04015 | -2      | activator | Downstream |
| hsa-let-7a     | SFN      | 0.09432 | -2    | 0.16363 | -2      | -2      | -2      | activator | Downstream |
| hsa-let-7b     | SFN      | 0.09432 | -2    | 0.16363 | -2      | -2      | -2      | activator | Downstream |
| hsa-miR-122a   | SFN      | 0.09432 | -2    | 0.65    | -2      | -2      | -2      | activator | Downstream |
| hsa-let-7a     | TAP1     | 0.09432 | -2    | 0.10899 | -2      | -2      | -2      | activator | Downstream |
| hsa-let-7b     | TAP1     | 0.09432 | -2    | 0.10899 | -2      | -2      | -2      | activator | Downstream |
| hsa-let-7f     | TAP1     | 0.09432 | -2    | 0.10899 | -2      | -2      | -2      | activator | Downstream |
| hsa-let-7i     | TAP1     | 0.09432 | -2    | 0.10899 | -2      | -2      | -2      | activator | Downstream |
| hsa-miR-222    | TAP1     | 0.09432 | -2    | 0.88949 | -2      | -2      | -2      | activator | Downstream |
| hsa-miR-30a-3p | TAP1     | 0.09432 | -2    | 0.15384 | -2      | -2      | -2      | activator | Downstream |
| hsa-miR-98     | TAP1     | 0.09432 | -2    | 0.34493 | -2      | -2      | -2      | activator | Downstream |
| hsa-miR-148a   | TGFA     | 0.11277 | 0.81  | -2      | -2      | -2      | -2      | activator | Downstream |
| hsa-miR-23a    | TGFA     | 0.11277 | 0.7   | -2      | -2      | -2      | -2      | activator | Downstream |
| hsa-miR-200b   | ANLN     | 0.20708 | 0.84  | 0.58397 | -2      | -2      | -1      | repressor | Downstream |
| hsa-miR-200c   | ANLN     | 0.20708 | 0.84  | 0.58397 | -2      | -2      | -2      | repressor | Downstream |
| hsa-miR-504    | ANLN     | 0.09432 | -2    | 0.31281 | -2      | -2      | -2      | repressor | Downstream |
| hsa-miR-129    | CDC25C   | 0.09432 | -2    | 0.79298 | -2      | -2      | -2      | repressor | Downstream |

|                |         |         |       |         |         |         |    |           |            |
|----------------|---------|---------|-------|---------|---------|---------|----|-----------|------------|
| hsa-miR-142-3p | CDC25C  | 0.09432 | -2    | 0.99572 | -2      | -2      | -2 | repressor | Downstream |
| hsa-miR-198    | CDC25C  | 0.09432 | -2    | 0.3585  | -2      | -2      | -2 | repressor | Downstream |
| hsa-miR-450    | CDC25C  | 0.09432 | -2    | 0.16525 | -2      | -2      | -2 | repressor | Downstream |
| hsa-miR-511    | CDC25C  | 0.09432 | -2    | 0.99646 | -2      | -2      | -2 | repressor | Downstream |
| hsa-miR-526a   | CDC25C  | 0.09432 | -2    | 0.69517 | -2      | -2      | -2 | repressor | Downstream |
| hsa-miR-101    | HSPA8   | 0.09432 | -1    | 0.97467 | -2      | -2      | -2 | repressor | Downstream |
| hsa-miR-194    | HSPA8   | 0.09432 | -1    | 0.09274 | -2      | -2      | -2 | repressor | Downstream |
| hsa-miR-33     | HSPA8   | 0.11277 | 0.58  | -1      | -2      | -2      | -2 | repressor | Downstream |
| hsa-miR-519b   | HSPA8   | 0.09432 | -2    | 0.86802 | -2      | -2      | -2 | repressor | Downstream |
| hsa-miR-519c   | HSPA8   | 0.09432 | -2    | 0.86802 | -2      | -2      | -2 | repressor | Downstream |
| hsa-miR-519d   | HSPA8   | 0.09432 | -2    | 0.86802 | -2      | -2      | -2 | repressor | Downstream |
| hsa-miR-142-3p | IER3    | 0.24015 | -2    | 0.71372 | -2      | 0.01825 | -2 | repressor | Downstream |
| hsa-miR-151    | IER3    | 0.09432 | -2    | 0.83899 | -2      | -1      | -2 | repressor | Downstream |
| hsa-miR-502    | NOS3    | 0.09432 | -2    | 0.82979 | -2      | -2      | -2 | repressor | Downstream |
| hsa-miR-192    | ODC1    | 0.09432 | -2    | 0.91022 | -2      | -1      | -2 | repressor | Downstream |
| hsa-miR-26b    | ODC1    | 0.09432 | -2    | 0.38156 | -2      | -1      | -2 | repressor | Downstream |
| hsa-let-7a     | SCD     | 0.14584 | -1    | -1      | -2      | 0.00001 | -1 | repressor | Downstream |
| hsa-let-7b     | SCD     | 0.14584 | -1    | -1      | -2      | 0.00001 | -1 | repressor | Downstream |
| hsa-let-7f     | SCD     | 0.14584 | -1    | -1      | -2      | 0.00001 | -1 | repressor | Downstream |
| hsa-let-7i     | SCD     | 0.14584 | -1    | -1      | -2      | 0.00001 | -1 | repressor | Downstream |
| hsa-miR-124a   | SCD     | 0.2586  | 0.903 | -1      | -2      | 0.01095 | -2 | repressor | Downstream |
| hsa-miR-200b   | SCD     | 0.14584 | -1    | -1      | -2      | 0.0073  | -1 | repressor | Downstream |
| hsa-miR-331    | SCD     | 0.14584 | -2    | -1      | -2      | 0.00365 | -1 | repressor | Downstream |
| hsa-miR-383    | SCD     | 0.14584 | -2    | -1      | -2      | 0.00001 | -2 | repressor | Downstream |
| hsa-miR-429    | SCD     | 0.14584 | -2    | -1      | -2      | 0.01095 | -2 | repressor | Downstream |
| hsa-miR-98     | SCD     | 0.14584 | -1    | -1      | -2      | 0.00365 | -1 | repressor | Downstream |
| hsa-miR-10a    | SLC38A2 | 0.11277 | 0.75  | -1      | -1      | -2      | -2 | repressor | Downstream |
| hsa-miR-10b    | SLC38A2 | 0.11277 | 0.75  | -1      | -1      | -2      | -2 | repressor | Downstream |
| hsa-miR-181c   | SLC38A2 | 0.11277 | 0.72  | -1      | -1      | -2      | -2 | repressor | Downstream |
| hsa-miR-26b    | SLC38A2 | 0.11277 | 0.968 | -1      | -1      | -2      | -2 | repressor | Downstream |
| hsa-miR-30b    | SLC38A2 | 0.11277 | 0.75  | -1      | -1      | -2      | -1 | repressor | Downstream |
| hsa-miR-30c    | SLC38A2 | 0.11277 | 0.75  | -1      | -1      | -2      | -1 | repressor | Downstream |
| hsa-miR-30d    | SLC38A2 | 0.11277 | 0.75  | -1      | -1      | -2      | -2 | repressor | Downstream |
| hsa-miR-32     | SLC38A2 | 0.11277 | 0.75  | -1      | -1      | -2      | -2 | repressor | Downstream |
| hsa-miR-363    | SLC38A2 | 0.41443 | -2    | -1      | 0.41143 | -2      | -2 | repressor | Downstream |
| hsa-miR-92     | SLC38A2 | 0.11277 | 0.75  | -1      | -1      | -2      | -2 | repressor | Downstream |
| hsa-miR-500    | TRPM2   | 0.09432 | -2    | 0.45445 | -2      | -2      | -2 | repressor | Downstream |
| hsa-miR-183    | SCARA3  | 0.09432 | -2    | 0.82208 | -2      | -2      | -2 | unknown   | Downstream |
| hsa-miR-182    | THBS2   | 0.11277 | 0.87  | -2      | -2      | -2      | -1 | unknown   | Downstream |
| hsa-miR-222    | THBS2   | 0.09432 | -1    | 0.19469 | -2      | -2      | -1 | unknown   | Downstream |
| hsa-miR-30b    | THBS2   | 0.11277 | 0.936 | -1      | -2      | -2      | -2 | unknown   | Downstream |
| hsa-miR-30c    | THBS2   | 0.11277 | 0.936 | -1      | -2      | -2      | -1 | unknown   | Downstream |
| hsa-miR-30d    | THBS2   | 0.11277 | 0.936 | -1      | -2      | -2      | -1 | unknown   | Downstream |
| hsa-miR-503    | THBS2   | 0.09432 | -2    | 0.34125 | -2      | -2      | -2 | unknown   | Downstream |
| hsa-miR-518a   | THBS2   | 0.09432 | -2    | 0.95857 | -2      | -2      | -2 | unknown   | Downstream |
| hsa-miR-518b   | THBS2   | 0.09432 | -2    | 0.95857 | -2      | -2      | -2 | unknown   | Downstream |
| hsa-miR-518c   | THBS2   | 0.09432 | -2    | 0.95857 | -2      | -2      | -2 | unknown   | Downstream |
| hsa-miR-518d   | THBS2   | 0.09432 | -2    | 0.95857 | -2      | -2      | -2 | unknown   | Downstream |
| hsa-miR-524    | THBS2   | 0.09432 | -2    | 0.64874 | -2      | -2      | -2 | unknown   | Downstream |
| hsa-miR-9      | THBS2   | 0.11277 | 0.88  | -2      | -2      | -2      | -1 | unknown   | Downstream |
