# Supplementary material for: Dissecting microregulation of a master regulatory network
Source: PubMed Central journal article supplement (PMC2289817; doi:10.1186/1471-2164-9-88), 2008-02-23
Supplement: 1471-2164-9-88-S4.pdf [file 1471-2164-9-88-S4.pdf]

**Additional File 4:** Functional enrichment (based on GO Biological Process) in 12497 target genes of 143 *p53-miRs* using DAVID. The background set is genome wide targets of miRNAs.

| GO Category Level          | GO Term (Biological Process)                                                 | No. of <i>p53-miR</i> target genes | % of <i>p53-miR</i> target genes | p-value     | Total No. of miRNA-target genes |
|----------------------------|------------------------------------------------------------------------------|------------------------------------|----------------------------------|-------------|---------------------------------|
| GOTERM_BP_5                | biopolymer modification                                                      | 1253                               | 10.26%                           | 4.55E-08    | 1401                            |
| GOTERM_BP_5                | phosphate metabolism                                                         | 648                                | 5.31%                            | 9.47E-06    | 718                             |
| GOTERM_BP_5                | regulation of nucleobase, nucleoside, nucleotide and nucleic acid metabolism | 1493                               | 12.22%                           | 4.86E-05    | 1699                            |
| GOTERM_BP_5                | transcription                                                                | 1542                               | 12.63%                           | 4.87E-05    | 1756                            |
| GOTERM_BP_5                | regulation of progression through cell cycle                                 | 367                                | 3.00%                            | 8.41E-04    | 406                             |
| GOTERM_BP_5                | protein kinase cascade                                                       | 228                                | 1.87%                            | 0.001834249 | 249                             |
| GOTERM_BP_5                | <b>vesicle-mediated transport</b>                                            | 297                                | 2.43%                            | 0.00353876  | 329                             |
| GOTERM_BP_5                | enzyme linked receptor protein signaling pathway                             | 159                                | 1.30%                            | 0.00395578  | 172                             |
| GOTERM_BP_5                | cellular protein metabolism                                                  | 1966                               | 16.10%                           | 0.006823061 | 2274                            |
| GOTERM_BP_5                | regulation of protein kinase activity                                        | 114                                | 0.93%                            | 0.006998868 | 122                             |
| GOTERM_BP_5                | negative regulation of cellular metabolism                                   | 158                                | 1.29%                            | 0.008051397 | 172                             |
| GOTERM_BP_5                | protein transport                                                            | 428                                | 3.50%                            | 0.011965203 | 483                             |
| GOTERM_BP_5                | regulation of cell size                                                      | 123                                | 1.01%                            | 0.023028155 | 134                             |
| GOTERM_BP_5                | cell growth                                                                  | 123                                | 1.01%                            | 0.023028155 | 134                             |
| GOTERM_BP_5                | regulation of cellular biosynthesis                                          | 106                                | 0.87%                            | 0.028106856 | 115                             |
| GOTERM_BP_5                | intracellular receptor-mediated signaling pathway                            | 41                                 | 0.34%                            | 0.035436058 | 42                              |
| GOTERM_BP_5                | negative regulation of progression through cell cycle                        | 123                                | 1.01%                            | 0.03961758  | 135                             |
| GOTERM_BP_5                | regulation of protein biosynthesis                                           | 101                                | 0.83%                            | 0.042152221 | 110                             |
| GOTERM_BP_5                | secretory pathway                                                            | 151                                | 1.24%                            | 0.059276637 | 168                             |
| GOTERM_BP_5                | nuclear transport                                                            | 88                                 | 0.72%                            | 0.06703705  | 96                              |
| GOTERM_BP_5                | M phase of mitotic cell cycle                                                | 122                                | 1.00%                            | 0.068456762 | 135                             |
| GOTERM_BP_5                | nucleocytoplasmic transport                                                  | 94                                 | 0.77%                            | 0.072104423 | 103                             |
| GOTERM_BP_5                | apoptosis                                                                    | 411                                | 3.37%                            | 0.072928653 | 470                             |
| GOTERM_BP_5                | regulation of programmed cell death                                          | 262                                | 2.15%                            | 0.07545553  | 297                             |
| GOTERM_BP_5                | regulation of apoptosis                                                      | 261                                | 2.14%                            | 0.078924672 | 296                             |
| GOTERM_BP_5                | negative regulation of programmed cell death                                 | 112                                | 0.92%                            | 0.085042646 | 124                             |
| GOTERM_BP_5                | exocytosis                                                                   | 56                                 | 0.46%                            | 0.089638826 | 60                              |
| GOTERM_BP_5                | regulation of protein metabolism                                             | 157                                | 1.29%                            | 0.08966786  | 176                             |
| GOTERM_BP_5                | polysaccharide metabolism                                                    | 41                                 | 0.34%                            | 0.090523214 | 43                              |
| <b>GO Category Level 4</b> |                                                                              |                                    |                                  |             |                                 |
| GOTERM_BP_4                | biopolymer metabolism                                                        | 1970                               | 16.13%                           | 8.18E-06    | 2246                            |
| GOTERM_BP_4                | phosphorus metabolism                                                        | 648                                | 5.31%                            | 1.17E-05    | 718                             |
| GOTERM_BP_4                | regulation of cellular metabolism                                            | 1593                               | 13.04%                           | 1.65E-05    | 1810                            |
| GOTERM_BP_4                | intracellular signaling cascade                                              | 839                                | 6.87%                            | 1.57E-04    | 944                             |
| GOTERM_BP_4                | negative regulation of cellular physiological process                        | 486                                | 3.98%                            | 3.46E-04    | 540                             |
| GOTERM_BP_4                | regulation of cell cycle                                                     | 368                                | 3.01%                            | 8.72E-04    | 407                             |
| GOTERM_BP_4                | <b>vesicle-mediated transport</b>                                            | 297                                | 2.43%                            | 0.003829613 | 329                             |
| GOTERM_BP_4                | mitotic cell cycle                                                           | 173                                | 1.42%                            | 0.004569708 | 188                             |
| GOTERM_BP_4                | cellular macromolecule metabolism                                            | 2002                               | 16.39%                           | 0.005410352 | 2313                            |
| GOTERM_BP_4                | regulation of kinase activity                                                | 114                                | 0.93%                            | 0.007285339 | 122                             |
| GOTERM_BP_4                | protein metabolism                                                           | 2130                               | 17.44%                           | 0.007596265 | 2465                            |
| GOTERM_BP_4                | establishment of protein localization                                        | 439                                | 3.59%                            | 0.010438917 | 495                             |
| GOTERM_BP_4                | protein transport                                                            | 428                                | 3.50%                            | 0.013034605 | 483                             |
| GOTERM_BP_4                | nucleobase, nucleoside, nucleotide and nucleic acid metabolism               | 2228                               | 18.24%                           | 0.021342394 | 2587                            |
| GOTERM_BP_4                | regulation of cell size                                                      | 123                                | 1.01%                            | 0.023875198 | 134                             |
| GOTERM_BP_4                | cellular morphogenesis                                                       | 208                                | 1.70%                            | 0.03300811  | 232                             |
| GOTERM_BP_4                | negative regulation of metabolism                                            | 180                                | 1.47%                            | 0.035476541 | 200                             |
| GOTERM_BP_4                | regulation of biosynthesis                                                   | 108                                | 0.88%                            | 0.043823577 | 118                             |
| GOTERM_BP_4                | secretory pathway                                                            | 151                                | 1.24%                            | 0.061353105 | 168                             |
| GOTERM_BP_4                | regulation of cell proliferation                                             | 226                                | 1.85%                            | 0.072106238 | 255                             |
| GOTERM_BP_4                | programmed cell death                                                        | 412                                | 3.37%                            | 0.07459477  | 471                             |
| GOTERM_BP_4                | organelle organization and biogenesis                                        | 575                                | 4.71%                            | 0.076533216 | 661                             |
| GOTERM_BP_4                | regulation of programmed cell death                                          | 262                                | 2.15%                            | 0.078916377 | 297                             |
| GOTERM_BP_4                | M phase                                                                      | 153                                | 1.25%                            | 0.080504194 | 171                             |
| GOTERM_BP_4                | interphase                                                                   | 56                                 | 0.46%                            | 0.091239468 | 60                              |
| GOTERM_BP_4                | regulation of protein metabolism                                             | 157                                | 1.29%                            | 0.092580271 | 176                             |
| <b>GO Category Level 3</b> |                                                                              |                                    |                                  |             |                                 |
| GOTERM_BP_3                | regulation of cellular physiological process                                 | 2249                               | 18.41%                           | 1.98E-08    | 2551                            |
| GOTERM_BP_3                | regulation of metabolism                                                     | 1637                               | 13.40%                           | 4.42E-05    | 1865                            |
| GOTERM_BP_3                | cell cycle                                                                   | 554                                | 4.54%                            | 2.16E-04    | 617                             |
| GOTERM_BP_3                | negative regulation of cellular process                                      | 540                                | 4.42%                            | 5.04E-04    | 603                             |
| GOTERM_BP_3                | negative regulation of physiological process                                 | 499                                | 4.09%                            | 0.001156982 | 558                             |
| GOTERM_BP_3                | primary metabolism                                                           | 4671                               | 38.25%                           | 0.001298836 | 5443                            |
| GOTERM_BP_3                | cellular metabolism                                                          | 4744                               | 38.84%                           | 0.005806365 | 5539                            |
| GOTERM_BP_3                | regulation of transferase activity                                           | 114                                | 0.93%                            | 0.007134428 | 122                             |
| GOTERM_BP_3                | cell organization and biogenesis                                             | 1080                               | 8.84%                            | 0.007340459 | 1238                            |
| GOTERM_BP_3                | cell division                                                                | 144                                | 1.18%                            | 0.014037848 | 157                             |
| GOTERM_BP_3                | protein localization                                                         | 451                                | 3.69%                            | 0.014186347 | 510                             |
| GOTERM_BP_3                | cell proliferation                                                           | 403                                | 3.30%                            | 0.016550654 | 455                             |
| GOTERM_BP_3                | cell growth                                                                  | 123                                | 1.01%                            | 0.023421184 | 134                             |
| GOTERM_BP_3                | nervous system development                                                   | 360                                | 2.95%                            | 0.0279716   | 407                             |
| GOTERM_BP_3                | cellular morphogenesis                                                       | 208                                | 1.70%                            | 0.032219305 | 232                             |

|             |                                              |      |        |             |      |
|-------------|----------------------------------------------|------|--------|-------------|------|
| GOTERM_BP_3 | positive regulation of physiological process | 358  | 2.93%  | 0.068854395 | 408  |
| GOTERM_BP_3 | cell death                                   | 424  | 3.47%  | 0.090489084 | 486  |
| GOTERM_BP_3 | macromolecule metabolism                     | 2888 | 23.65% | 0.09697427  | 3377 |
