# Supplementary material for: Dissecting microregulation of a master regulatory network
Source: PubMed Central journal article supplement (PMC2289817; doi:10.1186/1471-2164-9-88), 2008-02-23
Supplement: 1471-2164-9-88-S5.pdf [file 1471-2164-9-88-S5.pdf]

**Additional File 5:** Fisher's exact test was used to calculate the probability of p53-miRs targeting known p53-interactants. Fisher's exact test was performed online at the MATFORSK (<http://www.matforsk.no/ola/fisher.htm>).

**p53-miRs tend to target p53-interactants**

We calculated the probability of p53-miRs regulating the p53 interactants. We mined the BioGRID database (Stark et al., 2006) and currently there are 141 known interactants of p53. Surprisingly, 114 of these p53-interactants were predicted to be regulated by p53-miRs and were shown to be statistically significant ( $p = 1.41e-21$ ).

**2x2 Contingency table for validated p53 miRNA target genes & Known p53 interactants**

| Validated p53 miR target genes | Known p53 interactants |       |       |
|--------------------------------|------------------------|-------|-------|
|                                |                        | YES   | NO    |
| YES                            | 114                    | 12383 | 12497 |
| NO                             | 27                     | 17476 | 17503 |
|                                | 141                    | 29859 | 30000 |

*p-value = 1.41e-21*

TABLE = [114, 12383, 27, 17476]

Left : p-value = 1

Right : p-value = **1.4119768198028186e-21**

2-Tail : p-value = 1.6095343985747658e-21

**References**

Stark, C., Breitkreutz, B.J., Reguly, T., Boucher, L., Breitkreutz, A. and Tyers, M. (2006) BioGRID: a general repository for interaction datasets. *Nucleic Acids Res*, **34**, D535-539.
