# Supplementary material for: Dissecting microregulation of a master regulatory network
Source: PubMed Central journal article supplement (PMC2289817; doi:10.1186/1471-2164-9-88), 2008-02-23

# Additional File 6: Systematic break-down of the 474 human miRNAs based on their genomic location

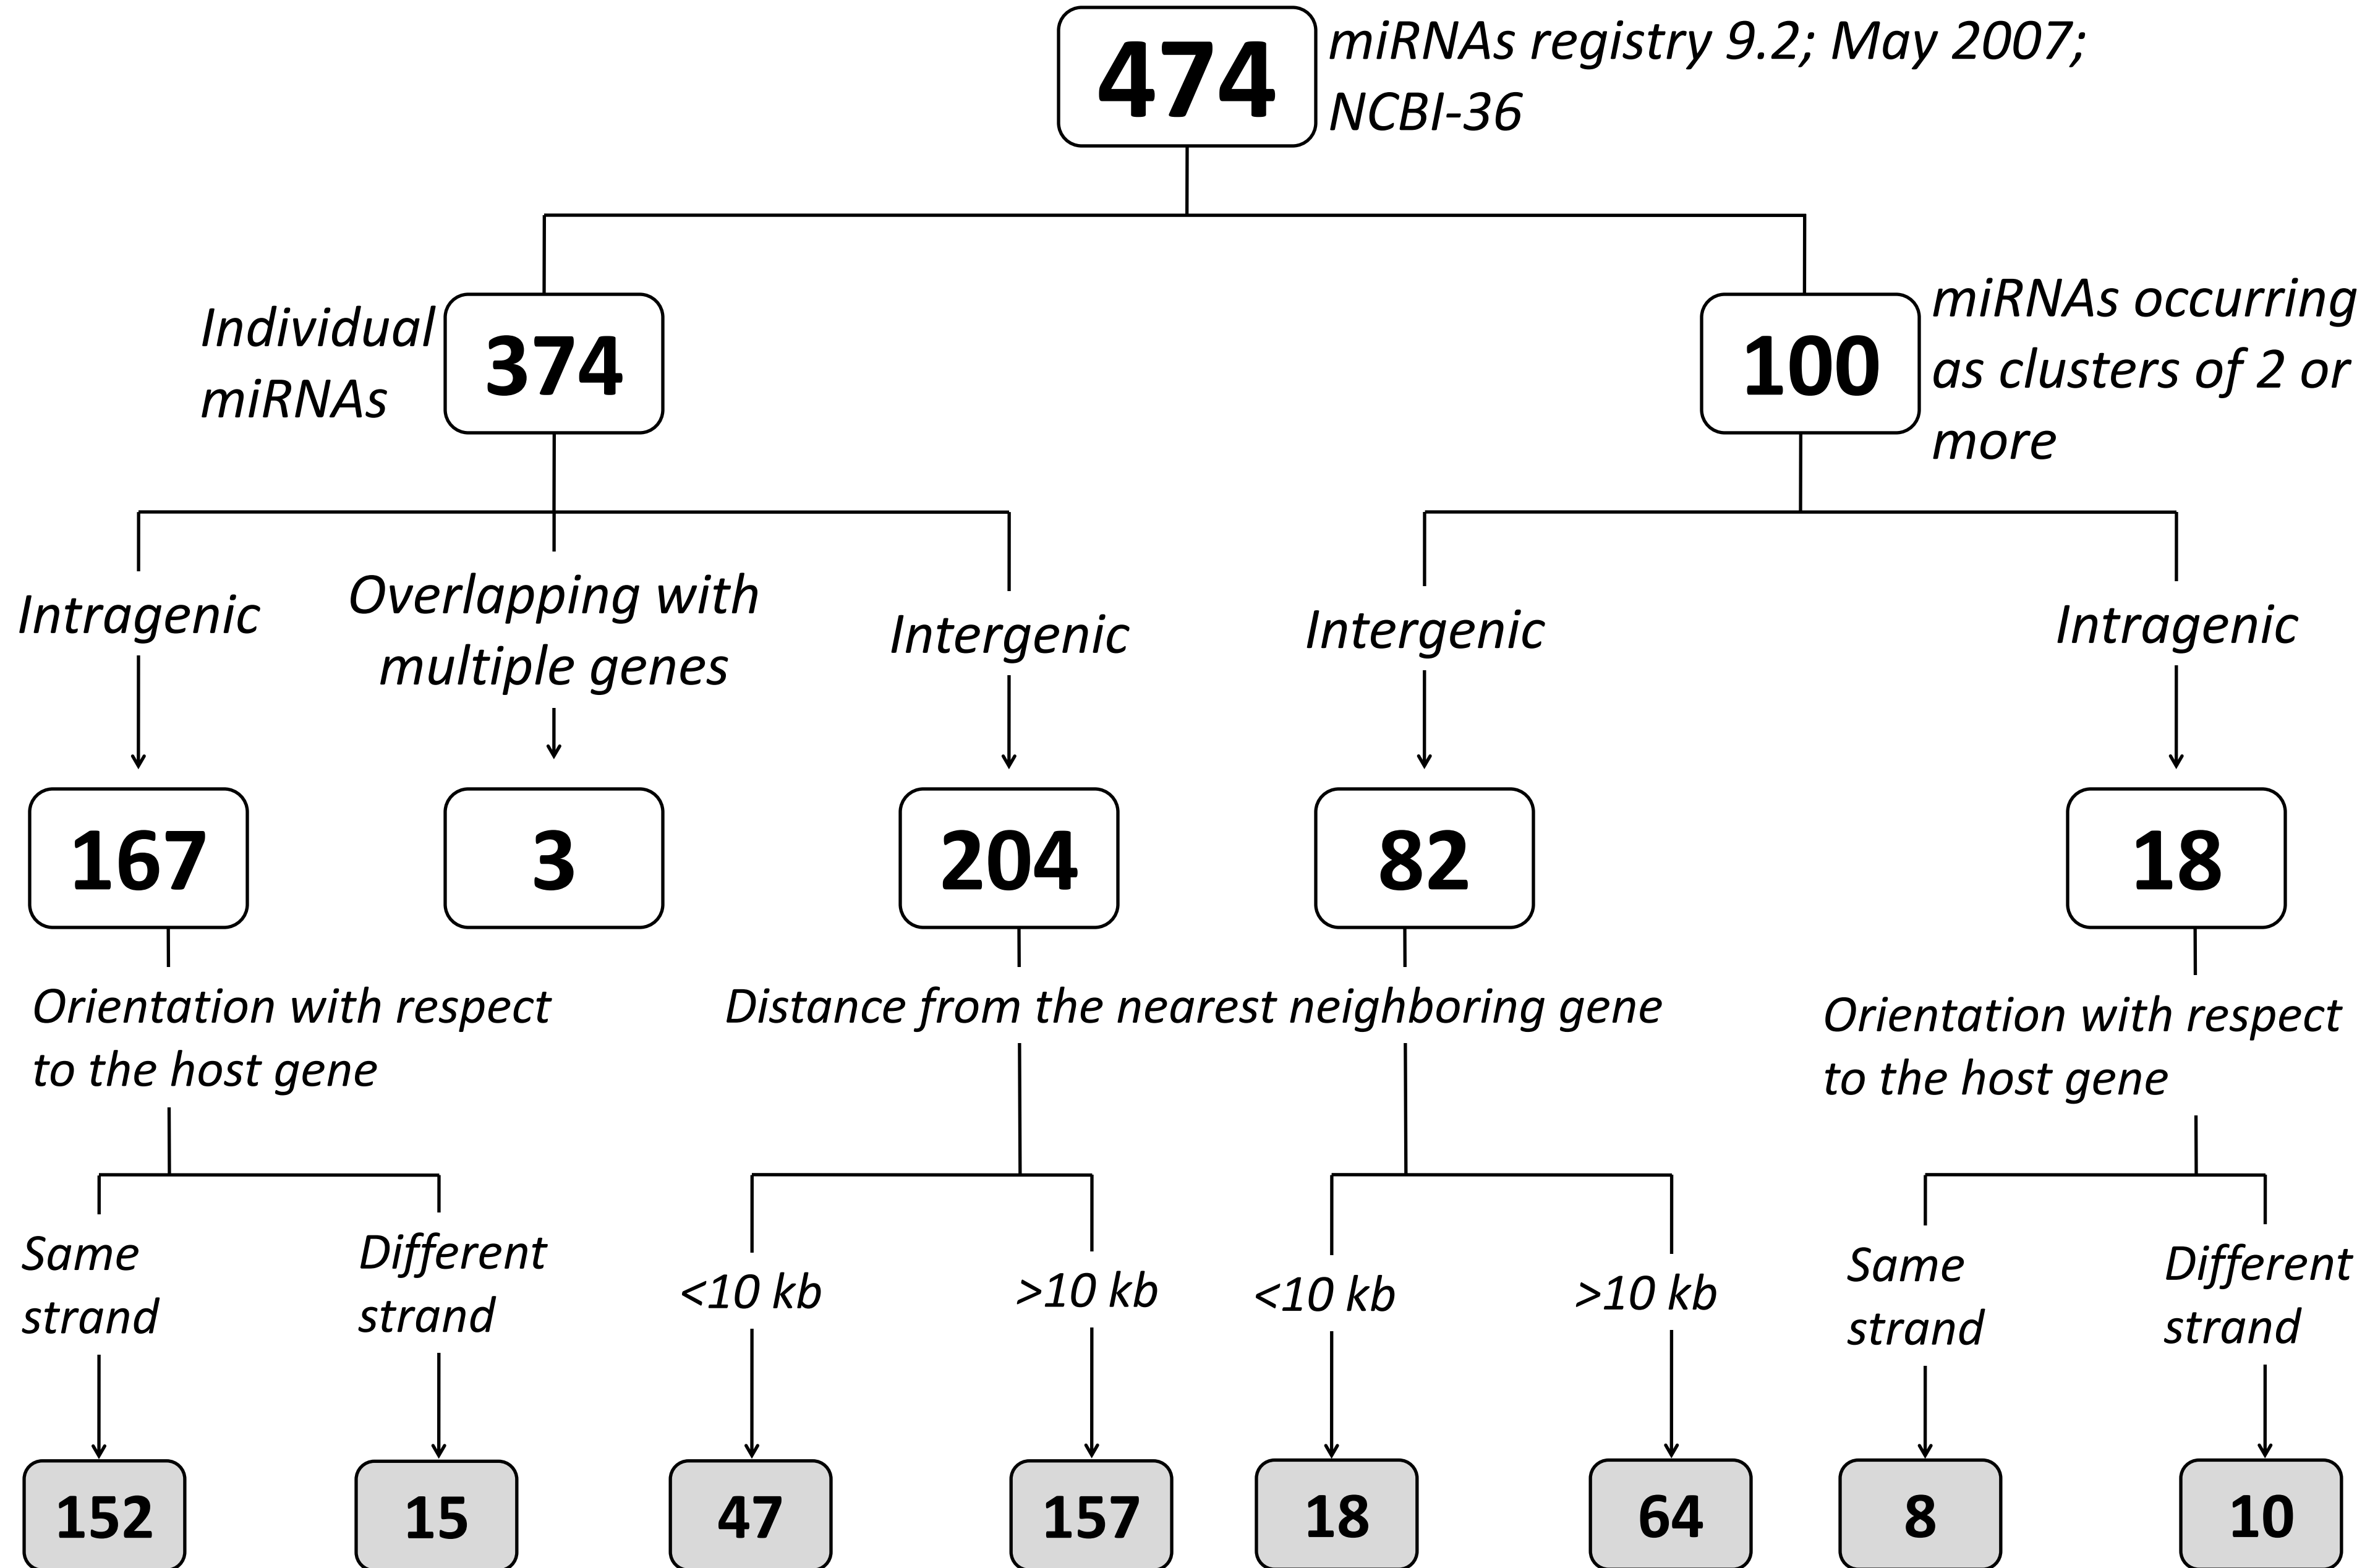

Supplement: 1471-2164-9-88-S6.pdf [file 1471-2164-9-88-S6.pdf]
