# Supplementary material for: Dissecting microregulation of a master regulatory network
Source: PubMed Central journal article supplement (PMC2289817; doi:10.1186/1471-2164-9-88), 2008-02-23
Supplement: 1471-2164-9-88-S7.pdf [file 1471-2164-9-88-S7.pdf]

**Additional File 7:** Out of a total 474 human miRNAs analyzed, 100 microRNAs were part of a cluster (2 or more miRNAs occurring together on the genome). In all, there were 100 miRNAs organized into 37 clusters (see Supplementary Figure 1A also). The cluster definitions were based on those defined by Yu et al [1]. The nearest neighboring gene information (gene name, distance from the nearest miRNA, orientation with respect to the host or neighboring gene) for each of the miRNA was extracted from the public database RefFlat provided by the UCSC Golden Path (<http://genome.ucsc.edu>). The position type refers to whether the microRNA is present within a gene and the orientation with respect to the host gene ("genic, "same strand" or "diff strand") or in an intergenic space. The comments column indicates the host gene (in case of intragenic or genic miRNAs) or the nearest neighboring genes (in case of intergenic miRNAs). The last column shows miRNA that are clustered together in the genome

1. Yu J, Wang F, Yang GH, Wang FL, Ma YN, Du ZW, Zhang JW: Human microRNA clusters: genomic organization and expression profile in leukemia cell lines. *Biochem Biophys Res Commun* 2006, 349(1):59-68.

| miRNA          | position type          | comments        | miRNA cluster |
|----------------|------------------------|-----------------|---------------|
| hsa-mir-324    | genic, diff strand     | ACADVL          |               |
| hsa-mir-486    | genic, diff strand     | ANK1            |               |
| hsa-mir-199b   | genic, diff strand     | DNM1            |               |
| hsa-mir-199a-1 | genic, diff strand     | DNM2            |               |
| hsa-mir-214    | genic, diff strand     | DNM3            |               |
| hsa-mir-199a-2 | genic, diff strand     | DNM3            |               |
| hsa-mir-328    | genic, diff strand     | ELMO3           |               |
| hsa-mir-549    | genic, diff strand     | KIAA1199        |               |
| hsa-mir-610    | genic, diff strand     | KIF18A          |               |
| hsa-mir-133a-1 | genic, diff strand     | MIB1            |               |
| hsa-mir-1-2    | genic, diff strand     | MIB1            |               |
| hsa-mir-662    | genic, diff strand     | MPFL            |               |
| hsa-mir-631    | genic, diff strand     | NEIL1           |               |
| hsa-mir-548d-2 | genic, diff strand     | PITPNC1         |               |
| hsa-mir-599    | genic, diff strand     | VPS13B          |               |
| hsa-mir-632    | genic, different genes | C17orf75-ZNF207 |               |
| hsa-mir-639    | genic, different genes | DNAJB1-GPSN2    |               |
| hsa-mir-564    | genic, different genes | KIF15-TMEM42    |               |
| hsa-mir-657    | genic, same strand     | AATK            |               |
| hsa-mir-338    | genic, same strand     | AATK            |               |
| hsa-mir-95     | genic, same strand     | ABLIM2          |               |
| hsa-mir-641    | genic, same strand     | AKT2            |               |
| hsa-mir-768    | genic, same strand     | AP1G1           |               |
| hsa-mir-765    | genic, same strand     | ARHGEF11        |               |
| hsa-mir-581    | genic, same strand     | ARL15           |               |
| hsa-mir-326    | genic, same strand     | ARRB1           |               |
| hsa-mir-555    | genic, same strand     | ASH1L           |               |
| hsa-mir-488    | genic, same strand     | ASTN1           |               |
| hsa-mir-548d-1 | genic, same strand     | ATAD2           |               |
| hsa-mir-558    | genic, same strand     | BIRC6           |               |
| hsa-mir-609    | genic, same strand     | C10orf79        |               |
| hsa-mir-611    | genic, same strand     | C11orf10        |               |
| hsa-mir-7-3    | genic, same strand     | C19orf30        |               |
| hsa-mir-9-1    | genic, same strand     | C1orf61         |               |
| hsa-mir-1-1    | genic, same strand     | C20orf166       |               |
| hsa-mir-133a-2 | genic, same strand     | C20orf166       |               |
| hsa-mir-99a    | genic, same strand     | C21orf34        |               |
| hsa-let-7c     | genic, same strand     | C21orf34        |               |
| hsa-mir-125b-2 | genic, same strand     | C21orf34        |               |
| hsa-mir-185    | genic, same strand     | C22orf25        |               |
| hsa-mir-567    | genic, same strand     | C3orf52         |               |
| hsa-mir-548b   | genic, same strand     | C6orf60         |               |
| hsa-mir-23b    | genic, same strand     | C9orf3          |               |
| hsa-mir-27b    | genic, same strand     | C9orf3          |               |
| hsa-mir-24-1   | genic, same strand     | C9orf3          |               |
| hsa-mir-32     | genic, same strand     | C9orf5          |               |
| hsa-mir-653    | genic, same strand     | CALCR           |               |
| hsa-mir-489    | genic, same strand     | CALCR           |               |
| hsa-mir-423    | genic, same strand     | CCDC55          |               |
| hsa-mir-628    | genic, same strand     | CCPG1           |               |
| hsa-mir-449    | genic, same strand     | CDC20B          |               |
| hsa-mir-449b   | genic, same strand     | CDC20B          |               |
| hsa-mir-361    | genic, same strand     | CHM             |               |
| hsa-mir-490    | genic, same strand     | CHRM2           |               |
| hsa-mir-455    | genic, same strand     | COL27A1         |               |
| hsa-mir-148b   | genic, same strand     | COPZ1           |               |
| hsa-mir-152    | genic, same strand     | COPZ2           |               |
| hsa-mir-578    | genic, same strand     | CPE             |               |
| hsa-mir-671    | genic, same strand     | CSTIIA-T        |               |
| hsa-mir-26b    | genic, same strand     | CTDSP1          |               |
| hsa-mir-26a-2  | genic, same strand     | CTDSP2          |               |

|               |                    |          |  |
|---------------|--------------------|----------|--|
| hsa-mir-26a-1 | genic, same strand | CTDSPL   |  |
| hsa-mir-637   | genic, same strand | DAPK3    |  |
| hsa-mir-616   | genic, same strand | DDIT3    |  |
| hsa-mir-601   | genic, same strand | DENND1A  |  |
| hsa-mir-562   | genic, same strand | DIS3L2   |  |
| hsa-mir-638   | genic, same strand | DNM2     |  |
| hsa-mir-126   | genic, same strand | EGFL7    |  |
| hsa-mir-590   | genic, same strand | EIF4H    |  |
| hsa-mir-330   | genic, same strand | EML2     |  |
| hsa-mir-342   | genic, same strand | EVL      |  |
| hsa-mir-574   | genic, same strand | FAM114A1 |  |
| hsa-mir-454   | genic, same strand | FAM33A   |  |
| hsa-mir-301   | genic, same strand | FAM33A   |  |
| hsa-mir-589   | genic, same strand | FBXL18   |  |
| hsa-mir-504   | genic, same strand | FGF13    |  |
| hsa-mir-198   | genic, same strand | FSTL1    |  |
| hsa-mir-625   | genic, same strand | FUT8     |  |
| hsa-mir-642   | genic, same strand | GIPR     |  |
| hsa-mir-149   | genic, same strand | GPC1     |  |
| hsa-mir-346   | genic, same strand | GRID1    |  |
| hsa-mir-592   | genic, same strand | GRM8     |  |
| hsa-mir-561   | genic, same strand | GULP1    |  |
| hsa-mir-7-1   | genic, same strand | HNRPK    |  |
| hsa-mir-615   | genic, same strand | HOXC5    |  |
| hsa-mir-448   | genic, same strand | HTR2C    |  |
| hsa-mir-483   | genic, same strand | IGF2     |  |
| hsa-mir-644   | genic, same strand | ITCH     |  |
| hsa-mir-603   | genic, same strand | KIAA1217 |  |
| hsa-mir-491   | genic, same strand | KIAA1797 |  |
| hsa-mir-617   | genic, same strand | LIN7A    |  |
| hsa-mir-618   | genic, same strand | LIN7A    |  |
| hsa-mir-580   | genic, same strand | LMBRD2   |  |
| hsa-mir-28    | genic, same strand | LPP      |  |
| hsa-mir-25    | genic, same strand | MCM7     |  |
| hsa-mir-93    | genic, same strand | MCM7     |  |
| hsa-mir-106b  | genic, same strand | MCM7     |  |
| hsa-mir-551a  | genic, same strand | MEGF6    |  |
| hsa-mir-335   | genic, same strand | MEST     |  |
| hsa-mir-626   | genic, same strand | MGA      |  |
| hsa-mir-339   | genic, same strand | MGC11257 |  |
| hsa-mir-22    | genic, same strand | MGC14376 |  |
| hsa-mir-511-1 | genic, same strand | MRC1     |  |
| hsa-mir-511-2 | genic, same strand | MRC1L1   |  |
| hsa-mir-208   | genic, same strand | MYH6     |  |
| hsa-mir-499   | genic, same strand | MYH7B    |  |
| hsa-mir-30e   | genic, same strand | NFYC     |  |
| hsa-mir-30c-1 | genic, same strand | NFYC     |  |
| hsa-mir-556   | genic, same strand | NOS1AP   |  |
| hsa-mir-107   | genic, same strand | PANK1    |  |
| hsa-mir-103-2 | genic, same strand | PANK2    |  |
| hsa-mir-103-1 | genic, same strand | PANK3    |  |
| hsa-mir-139   | genic, same strand | PDE2A    |  |
| hsa-mir-661   | genic, same strand | PLEC1    |  |
| hsa-mir-378   | genic, same strand | PPARGC1B |  |
| hsa-mir-634   | genic, same strand | PRKCA    |  |
| hsa-mir-605   | genic, same strand | PRKG1    |  |
| hsa-mir-151   | genic, same strand | PTK2     |  |
| hsa-mir-153-1 | genic, same strand | PTPRN    |  |
| hsa-mir-153-2 | genic, same strand | PTPRN2   |  |
| hsa-mir-595   | genic, same strand | PTPRN2   |  |
| hsa-mir-128a  | genic, same strand | R3HDM1   |  |
| hsa-mir-548c  | genic, same strand | RASSF3   |  |
| hsa-mir-101-2 | genic, same strand | RCL1     |  |
| hsa-mir-340   | genic, same strand | RNF130   |  |
| hsa-mir-553   | genic, same strand | RTCD1    |  |
| hsa-mir-575   | genic, same strand | SCD5     |  |
| hsa-mir-576   | genic, same strand | SEC24B   |  |
| hsa-mir-566   | genic, same strand | SEMA3F   |  |
| hsa-mir-608   | genic, same strand | SEMA4G   |  |
| hsa-mir-766   | genic, same strand | SEPT6    |  |
| hsa-mir-636   | genic, same strand | SFRS2    |  |
| hsa-mir-383   | genic, same strand | SGCZ     |  |
| hsa-mir-584   | genic, same strand | SH3TC2   |  |

|                |                    |                                                                  |  |
|----------------|--------------------|------------------------------------------------------------------|--|
| hsa-mir-591    | genic, same strand | SLC25A13                                                         |  |
| hsa-mir-218-1  | genic, same strand | SLIT2                                                            |  |
| hsa-mir-218-2  | genic, same strand | SLIT3                                                            |  |
| hsa-mir-585    | genic, same strand | SLIT3                                                            |  |
| hsa-mir-15b    | genic, same strand | SMC4                                                             |  |
| hsa-mir-16-2   | genic, same strand | SMC4                                                             |  |
| hsa-mir-593    | genic, same strand | SND1                                                             |  |
| hsa-mir-33b    | genic, same strand | SREBF1                                                           |  |
| hsa-mir-33     | genic, same strand | SREBF2                                                           |  |
| hsa-mir-619    | genic, same strand | SSH1                                                             |  |
| hsa-mir-658    | genic, same strand | starts in ANKRD54, ends in intergenic                            |  |
| hsa-mir-624    | genic, same strand | STRN3                                                            |  |
| hsa-mir-586    | genic, same strand | SUPT3H                                                           |  |
| hsa-mir-604    | genic, same strand | SVIL                                                             |  |
| hsa-mir-559    | genic, same strand | TACSTD1                                                          |  |
| hsa-mir-620    | genic, same strand | THRAP2                                                           |  |
| hsa-mir-629    | genic, same strand | TLE3                                                             |  |
| hsa-mir-190    | genic, same strand | TLN2                                                             |  |
| hsa-let-7g     | genic, same strand | TMEM113                                                          |  |
| hsa-mir-652    | genic, same strand | TMEM164                                                          |  |
| hsa-mir-569    | genic, same strand | TNIK                                                             |  |
| hsa-mir-597    | genic, same strand | TNKS                                                             |  |
| hsa-mir-211    | genic, same strand | TRPM1                                                            |  |
| hsa-mir-204    | genic, same strand | TRPM3                                                            |  |
| hsa-mir-554    | genic, same strand | TUFT1                                                            |  |
| hsa-mir-647    | genic, same strand | UCKL1                                                            |  |
| hsa-mir-577    | genic, same strand | UGT8                                                             |  |
| hsa-mir-627    | genic, same strand | VPS39                                                            |  |
| hsa-mir-635    | genic, same strand | WIPI1                                                            |  |
| hsa-mir-140    | genic, same strand | WWP2                                                             |  |
| hsa-mir-598    | genic, same strand | XKR6                                                             |  |
| hsa-mir-579    | genic, same strand | ZFR                                                              |  |
| hsa-mir-571    | genic, same strand | ZNF141                                                           |  |
| hsa-mir-643    | genic, same strand | ZNF766                                                           |  |
| hsa-mir-550-1  | genic, same strand | ZNRF2                                                            |  |
| hsa-mir-186    | genic, same strand | ZRANB2                                                           |  |
| hsa-mir-219-1  | intergenic, < 10kb | 1004 bp downstream of HSD17B8, 564 bp upstream of RING1          |  |
| hsa-mir-607    | intergenic, < 10kb | 108146 bp downstream of PIK3AP1, 4215 bp upstream of LCOR        |  |
| hsa-mir-150    | intergenic, < 10kb | 1097 bp downstream of RPS11, 12366 bp upstream of FCGRT          |  |
| hsa-mir-645    | intergenic, < 10kb | 1238 bp downstream of PTPN1, 229 bp upstream of C20orf175        |  |
| hsa-mir-320    | intergenic, < 10kb | 12870 bp downstream of PHYHIP, 62 bp upstream of POLR3D          |  |
| hsa-mir-345    | intergenic, < 10kb | 1335 bp downstream of SLC25A29, 15385 bp upstream of C14orf68    |  |
| hsa-mir-138-2  | intergenic, < 10kb | 13753 bp downstream of NUP93, 6628 bp upstream of SLC12A3        |  |
| hsa-mir-484    | intergenic, < 10kb | 141 bp downstream of KIAA0430, 6874 bp upstream of NDE1          |  |
| hsa-mir-10a    | intergenic, < 10kb | 1456 bp downstream of HOXB4, 11309 bp upstream of HOXB5          |  |
| hsa-mir-196a-2 | intergenic, < 10kb | 1461 bp downstream of HOXC10, 8245 bp upstream of HOXC9          |  |
| hsa-mir-594    | intergenic, < 10kb | 150910 bp downstream of TTC26, 529 bp upstream of HSPC268        |  |
| hsa-mir-649    | intergenic, < 10kb | 1617 bp downstream of SLC7A4, 11708 bp upstream of LOC400891     |  |
| hsa-mir-21     | intergenic, < 10kb | 173 bp downstream of TMEM49, 18152 bp upstream of TUBD1          |  |
| hsa-mir-548a-3 | intergenic, < 10kb | 17319 bp downstream of DPYS, 4773 bp upstream of LRP12           |  |
| hsa-mir-10b    | intergenic, < 10kb | 18304 bp downstream of HOXD8, 972 bp upstream of HOXD4           |  |
| hsa-mir-219-2  | intergenic, < 10kb | 1884 bp downstream of URM1, 28123 bp upstream of CEECAM1         |  |
| hsa-mir-614    | intergenic, < 10kb | 2164 bp downstream of GPRC5A, 24858 bp upstream of GPRC5D        |  |
| hsa-mir-92b    | intergenic, < 10kb | 2267 bp downstream of MUC1, 317 bp upstream of THBS3             |  |
| hsa-let-7i     | intergenic, < 10kb | 251 bp downstream of C12orf61, 542666 bp upstream of AVPR1A      |  |
| hsa-mir-130a   | intergenic, < 10kb | 26344 bp downstream of SERPING1, 3801 bp upstream of YPEL4       |  |
| hsa-mir-223    | intergenic, < 10kb | 276919 bp downstream of MSN, 2758 bp upstream of VSIG4           |  |
| hsa-mir-596    | intergenic, < 10kb | 30661 bp downstream of C8orf61, 6675 bp upstream of ARHGEF10     |  |
| hsa-mir-142    | intergenic, < 10kb | 3114 bp downstream of BZRAP1, 13859 bp upstream of SUPT4H1       |  |
| hsa-mir-451    | intergenic, < 10kb | 314 bp downstream of ERAL1, 17899 bp upstream of FLOT2           |  |
| hsa-mir-769    | intergenic, < 10kb | 315 bp downstream of LOC729440, 133 bp upstream of PGLYRP1       |  |
| hsa-mir-659    | intergenic, < 10kb | 3381 bp downstream of ANKRD54, 1588 bp upstream of EIF3S6IP      |  |
| hsa-mir-630    | intergenic, < 10kb | 3734 bp downstream of ARIH1, 67383 bp upstream of GOLGA          |  |
| hsa-mir-146b   | intergenic, < 10kb | 3845 bp downstream of CUEDC2, 13252 bp upstream of C10orf95      |  |
| hsa-mir-497    | intergenic, < 10kb | 391 bp downstream of C17orf49, 5027 bp upstream of BCL6B         |  |
| hsa-mir-196b   | intergenic, < 10kb | 3949 bp downstream of HOXA9, 1028 bp upstream of HOXA10          |  |
| hsa-mir-210    | intergenic, < 10kb | 4070 bp downstream of RASSF7, 8287 bp upstream of KIAA1542       |  |
| hsa-mir-197    | intergenic, < 10kb | 4539 bp downstream of GNAI3, 4300 bp upstream of GNAT2           |  |
| hsa-mir-144    | intergenic, < 10kb | 478 bp downstream of ERAL1, 17721 bp upstream of FLOT2           |  |
| hsa-mir-203    | intergenic, < 10kb | 4816 bp downstream of LOC374569, 463496 bp upstream of LOC400258 |  |
| hsa-mir-801    | intergenic, < 10kb | 5525 bp downstream of TAF12, 20037 bp upstream of GMEB1          |  |
| hsa-mir-202    | intergenic, < 10kb | 5582 bp downstream of VENTX, 14796 bp upstream of ADAM8          |  |
| hsa-mir-196a-1 | intergenic, < 10kb | 6016 bp downstream of HOXB9, 89170 bp upstream of PRAC           |  |

|                |                    |                                                                  |  |
|----------------|--------------------|------------------------------------------------------------------|--|
| hsa-mir-573    | intergenic, < 10kb | 630114 bp downstream of PPARGC1A, 7176 bp upstream of DHX15      |  |
| hsa-mir-7-2    | intergenic, < 10kb | 65171 bp downstream of DET1, 9423 bp upstream of ISG20L1         |  |
| hsa-mir-621    | intergenic, < 10kb | 655 bp downstream of SLC25A15, 121167 bp upstream of ELF1        |  |
| hsa-mir-568    | intergenic, < 10kb | 6973 bp downstream of VSIG9, 22106 bp upstream of ZBTB20         |  |
| hsa-mir-331    | intergenic, < 10kb | 7249 bp downstream of VEZT, 165532 bp upstream of METAP2         |  |
| hsa-mir-135a-1 | intergenic, < 10kb | 742 bp downstream of GLYCTK, 22195 bp upstream of DNAH1          |  |
| hsa-mir-565    | intergenic, < 10kb | 7709 bp downstream of LIMD1, 382 bp upstream of SACM1L           |  |
| hsa-mir-375    | intergenic, < 10kb | 8239 bp downstream of CRYBA2, 1145 bp upstream of CCDC108        |  |
| hsa-mir-130b   | intergenic, < 10kb | 9005 bp downstream of SDF2L1, 12598 bp upstream of PPIL2         |  |
| hsa-mir-195    | intergenic, < 10kb | 95 bp downstream of C17orf49, 5348 bp upstream of BCL6B          |  |
| hsa-mir-30a    | intergenic, > 10kb | 101282 bp downstream of OGFRL1, 483325 bp upstream of RIMS1      |  |
| hsa-mir-296    | intergenic, > 10kb | 101758 bp downstream of NPEPL1, 22045 bp upstream of GNAS        |  |
| hsa-mir-518a-2 | intergenic, > 10kb | 102323 bp downstream of DPRX, 54183 bp upstream of NLRP12        |  |
| hsa-mir-548a-1 | intergenic, > 10kb | 103166 bp downstream of IBRDC2, 1265505 bp upstream of ID4       |  |
| hsa-mir-30b    | intergenic, > 10kb | 103968 bp downstream of ZFAT1, 656865 bp upstream of KHDRBS3     |  |
| hsa-mir-517c   | intergenic, > 10kb | 104303 bp downstream of DPRX, 52195 bp upstream of NLRP12        |  |
| hsa-mir-520h   | intergenic, > 10kb | 105502 bp downstream of DPRX, 51003 bp upstream of NLRP12        |  |
| hsa-mir-30d    | intergenic, > 10kb | 108324 bp downstream of ZFAT1, 652527 bp upstream of KHDRBS3     |  |
| hsa-mir-521-1  | intergenic, > 10kb | 111626 bp downstream of DPRX, 44880 bp upstream of NLRP12        |  |
| hsa-mir-522    | intergenic, > 10kb | 114201 bp downstream of DPRX, 42305 bp upstream of NLRP12        |  |
| hsa-mir-519a-1 | intergenic, > 10kb | 115387 bp downstream of DPRX, 41121 bp upstream of NLRP12        |  |
| hsa-mir-587    | intergenic, > 10kb | 116589 bp downstream of QRSL1, 117321 bp upstream of C6orf203    |  |
| hsa-mir-124a-2 | intergenic, > 10kb | 1166360 bp downstream of YTHDF3, 200999 bp upstream of BHLHB5    |  |
| hsa-mir-527    | intergenic, > 10kb | 117008 bp downstream of DPRX, 39500 bp upstream of NLRP12        |  |
| hsa-mir-583    | intergenic, > 10kb | 117066 bp downstream of ELL2, 311202 bp upstream of PCSK1        |  |
| hsa-mir-582    | intergenic, > 10kb | 117156 bp downstream of PDE4D, 893210 bp upstream of DEPDC1B     |  |
| hsa-mir-770    | intergenic, > 10kb | 117269 bp downstream of DLK1, 152820 bp upstream of FLJ41170     |  |
| hsa-mir-205    | intergenic, > 10kb | 1187812 bp downstream of PLXNA2, 151457 bp upstream of CAMK1G    |  |
| hsa-mir-570    | intergenic, > 10kb | 119173 bp downstream of APOD, 21971 bp upstream of MUC20         |  |
| hsa-mir-184    | intergenic, > 10kb | 119289 bp downstream of RASGRF1, 101277 bp upstream of TMED3     |  |
| hsa-mir-516-1  | intergenic, > 10kb | 119731 bp downstream of DPRX, 36772 bp upstream of NLRP12        |  |
| hsa-mir-124a-1 | intergenic, > 10kb | 121042 bp downstream of TNKS, 150843 bp upstream of MSRA         |  |
| hsa-mir-137    | intergenic, > 10kb | 125010 bp downstream of DPYD, 615485 bp upstream of SNX7         |  |
| hsa-mir-182    | intergenic, > 10kb | 13302 bp downstream of NRF1, 62662 bp upstream of UBE2H          |  |
| hsa-mir-493    | intergenic, > 10kb | 133939 bp downstream of DLK1, 136159 bp upstream of FLJ41170     |  |
| hsa-mir-633    | intergenic, > 10kb | 135880 bp downstream of RNF190, 487992 bp upstream of CYB561     |  |
| hsa-mir-588    | intergenic, > 10kb | 136028 bp downstream of C6orf173, 634188 bp upstream of RSPO3    |  |
| hsa-mir-513-1  | intergenic, > 10kb | 1383612 bp downstream of CXorf1, 698399 bp upstream of FMR1      |  |
| hsa-mir-337    | intergenic, > 10kb | 139372 bp downstream of DLK1, 130722 bp upstream of FLJ41170     |  |
| hsa-mir-513-2  | intergenic, > 10kb | 1395975 bp downstream of CXorf1, 686038 bp upstream of FMR1      |  |
| hsa-mir-508    | intergenic, > 10kb | 1407062 bp downstream of CXorf1, 674963 bp upstream of FMR1      |  |
| hsa-mir-563    | intergenic, > 10kb | 14224 bp downstream of ANKRD28, 300799 bp upstream of GALNTL2    |  |
| hsa-mir-509    | intergenic, > 10kb | 1430681 bp downstream of CXorf1, 651365 bp upstream of FMR1      |  |
| hsa-mir-510    | intergenic, > 10kb | 1442484 bp downstream of CXorf1, 639582 bp upstream of FMR1      |  |
| hsa-mir-431    | intergenic, > 10kb | 145886 bp downstream of DLK1, 124187 bp upstream of FLJ41170     |  |
| hsa-mir-433    | intergenic, > 10kb | 146765 bp downstream of DLK1, 123329 bp upstream of FLJ41170     |  |
| hsa-mir-550-2  | intergenic, > 10kb | 148813 bp downstream of KIAA0241, 135096 bp upstream of KBTBD2   |  |
| hsa-mir-606    | intergenic, > 10kb | 150790 bp downstream of ZNF503, 230207 bp upstream of C10orf11   |  |
| hsa-mir-532    | intergenic, > 10kb | 169186 bp downstream of PAGE4, 64370 bp upstream of CLCN5        |  |
| hsa-mir-188    | intergenic, > 10kb | 169540 bp downstream of PAGE4, 64020 bp upstream of CLCN5        |  |
| hsa-mir-124a-3 | intergenic, > 10kb | 171509 bp downstream of BHLHB4, 16845 bp upstream of YTHDF1      |  |
| hsa-mir-650    | intergenic, > 10kb | 174901 bp downstream of GGTL4, 236228 bp upstream of RTDR1       |  |
| hsa-mir-370    | intergenic, > 10kb | 176018 bp downstream of DLK1, 94094 bp upstream of FLJ41170      |  |
| hsa-mir-129-1  | intergenic, > 10kb | 176922 bp downstream of LRRC4, 33334 bp upstream of LEP          |  |
| hsa-mir-660    | intergenic, > 10kb | 179280 bp downstream of PAGE4, 54269 bp upstream of CLCN5        |  |
| hsa-mir-502    | intergenic, > 10kb | 180637 bp downstream of PAGE4, 52923 bp upstream of CLCN5        |  |
| hsa-mir-492    | intergenic, > 10kb | 183849 bp downstream of TMCC3, 136821 bp upstream of NDUFA12     |  |
| hsa-mir-758    | intergenic, > 10kb | 18987 bp downstream of FLJ41170, 535243 bp upstream of DIO3      |  |
| hsa-mir-187    | intergenic, > 10kb | 192986 bp downstream of GALNT1, 67698 bp upstream of C18orf21    |  |
| hsa-mir-329-1  | intergenic, > 10kb | 19752 bp downstream of FLJ41170, 534486 bp upstream of DIO3      |  |
| hsa-mir-651    | intergenic, > 10kb | 199562 bp downstream of PNPLA4, 42883 bp upstream of VCX2        |  |
| hsa-mir-548a-2 | intergenic, > 10kb | 19988 bp downstream of MYB, 44730 bp upstream of AHI1            |  |
| hsa-mir-329-2  | intergenic, > 10kb | 20067 bp downstream of FLJ41170, 534167 bp upstream of DIO3      |  |
| hsa-mir-648    | intergenic, > 10kb | 206375 bp downstream of BID, 96977 bp upstream of PEX26          |  |
| hsa-mir-193a   | intergenic, > 10kb | 21775 bp downstream of RAB11FIP4, 291796 bp upstream of C17orf79 |  |
| hsa-mir-34a    | intergenic, > 10kb | 22497 bp downstream of GPR157, 83026 bp upstream of H6PD         |  |
| hsa-mir-494    | intergenic, > 10kb | 22601 bp downstream of FLJ41170, 531636 bp upstream of DIO3      |  |
| hsa-mir-646    | intergenic, > 10kb | 235523 bp downstream of C20orf197, 943933 bp upstream of CDH4    |  |
| hsa-mir-622    | intergenic, > 10kb | 2551567 bp downstream of SLITRK5, 1167355 bp upstream of GPC5    |  |
| hsa-mir-135b   | intergenic, > 10kb | 26248 bp downstream of LEMD1, 56200 bp upstream of PCTK3         |  |
| hsa-mir-495    | intergenic, > 10kb | 26722 bp downstream of FLJ41170, 527514 bp upstream of DIO3      |  |
| hsa-mir-16-1   | intergenic, > 10kb | 28051 bp downstream of KCNRG, 662839 bp upstream of DLEU7        |  |
| hsa-mir-15a    | intergenic, > 10kb | 28197 bp downstream of KCNRG, 662699 bp upstream of DLEU7        |  |
| hsa-mir-512-1  | intergenic, > 10kb | 29669 bp downstream of DPRX, 126840 bp upstream of NLRP12        |  |

|                |                    |                                                                  |  |
|----------------|--------------------|------------------------------------------------------------------|--|
| hsa-mir-31     | intergenic, > 10kb | 29801 bp downstream of IFNE1, 290450 bp upstream of MTAP         |  |
| hsa-let-7a-2   | intergenic, > 10kb | 30306 bp downstream of BRCC2, 509128 bp upstream of STS-1        |  |
| hsa-mir-612    | intergenic, > 10kb | 30935 bp downstream of FKSG44, 80519 bp upstream of SCYL1        |  |
| hsa-mir-512-2  | intergenic, > 10kb | 32147 bp downstream of DPRX, 124348 bp upstream of NLRP12        |  |
| hsa-mir-9-3    | intergenic, > 10kb | 33221 bp downstream of POLG, 103304 bp upstream of RHCG          |  |
| hsa-mir-100    | intergenic, > 10kb | 36013 bp downstream of BRCC2, 503413 bp upstream of STS-1        |  |
| hsa-mir-17     | intergenic, > 10kb | 3670990 bp downstream of SLITRK5, 47944 bp upstream of GPC5      |  |
| hsa-mir-18a    | intergenic, > 10kb | 3671136 bp downstream of SLITRK5, 47811 bp upstream of GPC5      |  |
| hsa-mir-19a    | intergenic, > 10kb | 3671276 bp downstream of SLITRK5, 47660 bp upstream of GPC5      |  |
| hsa-mir-20a    | intergenic, > 10kb | 3671450 bp downstream of SLITRK5, 47497 bp upstream of GPC5      |  |
| hsa-mir-19b-1  | intergenic, > 10kb | 3671577 bp downstream of SLITRK5, 47354 bp upstream of GPC5      |  |
| hsa-mir-92-1   | intergenic, > 10kb | 3671699 bp downstream of SLITRK5, 47241 bp upstream of GPC5      |  |
| hsa-mir-422a   | intergenic, > 10kb | 36981 bp downstream of HERC1, 36016 bp upstream of DAPK2         |  |
| hsa-mir-498    | intergenic, > 10kb | 37187 bp downstream of DPRX, 119282 bp upstream of NLRP12        |  |
| hsa-mir-365-2  | intergenic, > 10kb | 37190 bp downstream of RAB11FIP4, 276358 bp upstream of C17orf79 |  |
| hsa-mir-193b   | intergenic, > 10kb | 37194 bp downstream of MKL2, 131652 bp upstream of PARN          |  |
| hsa-mir-520e   | intergenic, > 10kb | 38701 bp downstream of DPRX, 117805 bp upstream of NLRP12        |  |
| hsa-mir-381    | intergenic, > 10kb | 38887 bp downstream of FLJ41170, 515356 bp upstream of DIO3      |  |
| hsa-mir-487b   | intergenic, > 10kb | 39422 bp downstream of FLJ41170, 514812 bp upstream of DIO3      |  |
| hsa-mir-138-1  | intergenic, > 10kb | 395412 bp downstream of ABHD5, 223830 bp upstream of C3orf23     |  |
| hsa-mir-9-2    | intergenic, > 10kb | 398005 bp downstream of TMEM161B, 53408 bp upstream of MEF2C     |  |
| hsa-mir-539    | intergenic, > 10kb | 40288 bp downstream of FLJ41170, 513952 bp upstream of DIO3      |  |
| hsa-mir-155    | intergenic, > 10kb | 4035077 bp downstream of NCAM2, 11613 bp upstream of MRPL39      |  |
| hsa-mir-542    | intergenic, > 10kb | 40674 bp downstream of HPR1, 24405 bp upstream of PLAC1          |  |
| hsa-mir-544    | intergenic, > 10kb | 41625 bp downstream of FLJ41170, 512602 bp upstream of DIO3      |  |
| hsa-mir-515-1  | intergenic, > 10kb | 41993 bp downstream of DPRX, 114517 bp upstream of NLRP12        |  |
| hsa-mir-613    | intergenic, > 10kb | 42280 bp downstream of CDKN1B, 20937 bp upstream of APOLD1       |  |
| hsa-mir-365-1  | intergenic, > 10kb | 42512 bp downstream of MKL2, 126330 bp upstream of PARN          |  |
| hsa-mir-655    | intergenic, > 10kb | 42517 bp downstream of FLJ41170, 511704 bp upstream of DIO3      |  |
| hsa-mir-519e   | intergenic, > 10kb | 42930 bp downstream of DPRX, 113579 bp upstream of NLRP12        |  |
| hsa-mir-552    | intergenic, > 10kb | 450470 bp downstream of C1orf94, 85425 bp upstream of GJB5       |  |
| hsa-mir-520f   | intergenic, > 10kb | 45149 bp downstream of DPRX, 111357 bp upstream of NLRP12        |  |
| hsa-mir-487a   | intergenic, > 10kb | 45413 bp downstream of FLJ41170, 508825 bp upstream of DIO3      |  |
| hsa-mir-551b   | intergenic, > 10kb | 455972 bp downstream of GOLPH4, 532812 bp upstream of EVI1       |  |
| hsa-mir-560    | intergenic, > 10kb | 456266 bp downstream of MGC50273, 158551 bp upstream of GPR39    |  |
| hsa-mir-125b-1 | intergenic, > 10kb | 470077 bp downstream of SORL1, 15509 bp upstream of BRCC2        |  |
| hsa-mir-515-2  | intergenic, > 10kb | 47999 bp downstream of DPRX, 108511 bp upstream of NLRP12        |  |
| hsa-mir-668    | intergenic, > 10kb | 48225 bp downstream of FLJ41170, 506027 bp upstream of DIO3      |  |
| hsa-mir-485    | intergenic, > 10kb | 48386 bp downstream of FLJ41170, 505859 bp upstream of DIO3      |  |
| hsa-mir-623    | intergenic, > 10kb | 48690 bp downstream of EBI2, 145245 bp upstream of TM9SF2        |  |
| hsa-mir-384    | intergenic, > 10kb | 487943 bp downstream of MAGEE1, 540123 bp upstream of FGF16      |  |
| hsa-mir-453    | intergenic, > 10kb | 49157 bp downstream of FLJ41170, 505081 bp upstream of DIO3      |  |
| hsa-mir-519c   | intergenic, > 10kb | 49459 bp downstream of DPRX, 107047 bp upstream of NLRP12        |  |
| hsa-mir-122a   | intergenic, > 10kb | 52916 bp downstream of NEDD4L, 30091 bp upstream of ALPK2        |  |
| hsa-mir-421    | intergenic, > 10kb | 533967 bp downstream of CHIC1, 85728 bp upstream of ZCCHC13      |  |
| hsa-mir-520a   | intergenic, > 10kb | 53871 bp downstream of DPRX, 102637 bp upstream of NLRP12        |  |
| hsa-mir-146a   | intergenic, > 10kb | 56613 bp downstream of PTTG1, 802978 bp upstream of GABRB2       |  |
| hsa-mir-206    | intergenic, > 10kb | 56723 bp downstream of PKHD1, 41952 bp upstream of IL17A         |  |
| hsa-mir-526b   | intergenic, > 10kb | 57383 bp downstream of DPRX, 99127 bp upstream of NLRP12         |  |
| hsa-mir-325    | intergenic, > 10kb | 574071 bp downstream of MAGEE1, 453985 bp upstream of FGF16      |  |
| hsa-mir-519b   | intergenic, > 10kb | 58203 bp downstream of DPRX, 98309 bp upstream of NLRP12         |  |
| hsa-mir-409    | intergenic, > 10kb | 58267 bp downstream of FLJ41170, 495972 bp upstream of DIO3      |  |
| hsa-mir-412    | intergenic, > 10kb | 58414 bp downstream of FLJ41170, 495813 bp upstream of DIO3      |  |
| hsa-mir-369    | intergenic, > 10kb | 58565 bp downstream of FLJ41170, 495683 bp upstream of DIO3      |  |
| hsa-mir-128b   | intergenic, > 10kb | 58590 bp downstream of ARPP-21, 636045 bp upstream of STAC       |  |
| hsa-mir-410    | intergenic, > 10kb | 58879 bp downstream of FLJ41170, 495359 bp upstream of DIO3      |  |
| hsa-mir-217    | intergenic, > 10kb | 59169 bp downstream of EFEMP1, 201046 bp upstream of CCDC85A     |  |
| hsa-mir-656    | intergenic, > 10kb | 59691 bp downstream of FLJ41170, 494549 bp upstream of DIO3      |  |
| hsa-mir-545    | intergenic, > 10kb | 602694 bp downstream of CHIC1, 16980 bp upstream of ZCCHC13      |  |
| hsa-mir-374    | intergenic, > 10kb | 602876 bp downstream of CHIC1, 16832 bp upstream of ZCCHC13      |  |
| hsa-mir-525    | intergenic, > 10kb | 60523 bp downstream of DPRX, 95985 bp upstream of NLRP12         |  |
| hsa-mir-557    | intergenic, > 10kb | 61099 bp downstream of TBX19, 165144 bp upstream of XCL2         |  |
| hsa-mir-135a-2 | intergenic, > 10kb | 611550 bp downstream of NEDD1, 951719 bp upstream of TMPO        |  |
| hsa-mir-133b   | intergenic, > 10kb | 61297 bp downstream of PKHD1, 37345 bp upstream of IL17A         |  |
| hsa-mir-523    | intergenic, > 10kb | 61375 bp downstream of DPRX, 95131 bp upstream of NLRP12         |  |
| hsa-mir-518f   | intergenic, > 10kb | 63005 bp downstream of DPRX, 93501 bp upstream of NLRP12         |  |
| hsa-mir-520b   | intergenic, > 10kb | 64217 bp downstream of DPRX, 92315 bp upstream of NLRP12         |  |
| hsa-mir-216    | intergenic, > 10kb | 65152 bp downstream of EFEMP1, 195063 bp upstream of CCDC85A     |  |
| hsa-mir-518b   | intergenic, > 10kb | 65727 bp downstream of DPRX, 90783 bp upstream of NLRP12         |  |
| hsa-mir-802    | intergenic, > 10kb | 671417 bp downstream of RUNX1, 313733 bp upstream of SETD4       |  |
| hsa-mir-572    | intergenic, > 10kb | 683961 bp downstream of MIST, 29443 bp upstream of HS3ST1        |  |
| hsa-let-7d     | intergenic, > 10kb | 68979 bp downstream of PTPDC1, 80375 bp upstream of ZNF169       |  |
| hsa-mir-220    | intergenic, > 10kb | 71179 bp downstream of GRIA3, 38356 bp upstream of THOC2         |  |

|                |                    |                                                                  |               |
|----------------|--------------------|------------------------------------------------------------------|---------------|
| hsa-mir-148a   | intergenic, > 10kb | 721433 bp downstream of NPVF, 202253 bp upstream of NFE2L3       |               |
| hsa-mir-602    | intergenic, > 10kb | 73648 bp downstream of FLJ40292, 39272 bp upstream of CACNA1B    |               |
| hsa-mir-30c-2  | intergenic, > 10kb | 74691 bp downstream of OGFRL1, 509915 bp upstream of RIMS1       |               |
| hsa-mir-600    | intergenic, > 10kb | 75930 bp downstream of GPR21, 13397 bp upstream of STRBP         |               |
| hsa-mir-640    | intergenic, > 10kb | 76308 bp downstream of KIAA0892, 23429 bp upstream of GATAD2A    |               |
| hsa-mir-521-2  | intergenic, > 10kb | 79584 bp downstream of DPRX, 76922 bp upstream of NLRP12         |               |
| hsa-mir-520d   | intergenic, > 10kb | 83086 bp downstream of DPRX, 73420 bp upstream of NLRP12         |               |
| hsa-mir-517b   | intergenic, > 10kb | 84066 bp downstream of DPRX, 72460 bp upstream of NLRP12         |               |
| hsa-mir-520g   | intergenic, > 10kb | 85156 bp downstream of DPRX, 71347 bp upstream of NLRP12         |               |
| hsa-mir-129-2  | intergenic, > 10kb | 87448 bp downstream of TTC17, 99271 bp upstream of HSD17B12      |               |
| hsa-mir-147    | intergenic, > 10kb | 875517 bp downstream of DBC1, 143819 bp upstream of CDK5RAP2     |               |
| hsa-mir-516-3  | intergenic, > 10kb | 88432 bp downstream of DPRX, 68076 bp upstream of NLRP12         |               |
| hsa-mir-526a-2 | intergenic, > 10kb | 89912 bp downstream of DPRX, 66616 bp upstream of NLRP12         |               |
| hsa-mir-505    | intergenic, > 10kb | 91859 bp downstream of ATP11C, 31494 bp upstream of LOC347487    |               |
| hsa-mir-101-1  | intergenic, > 10kb | 91929 bp downstream of JAK1, 89040 bp upstream of AK3L1          |               |
| hsa-mir-518e   | intergenic, > 10kb | 92828 bp downstream of DPRX, 63677 bp upstream of NLRP12         |               |
| hsa-mir-518a-1 | intergenic, > 10kb | 93996 bp downstream of DPRX, 62512 bp upstream of NLRP12         |               |
| hsa-mir-663    | intergenic, > 10kb | 94123 bp downstream of C20orf191, 3172213 bp upstream of DEFB115 |               |
| hsa-mir-518d   | intergenic, > 10kb | 97867 bp downstream of DPRX, 58639 bp upstream of NLRP12         |               |
| hsa-mir-516-4  | intergenic, > 10kb | 99835 bp downstream of DPRX, 56668 bp upstream of NLRP12         |               |
| hsa-mir-191    | genic, diff strand | C3orf60 (DALRD3, same strand)                                    | clus-191      |
| hsa-mir-194-1  | genic, diff strand | IARS2                                                            | clus-215      |
| hsa-mir-215    | genic, diff strand | IARS2                                                            | clus-215      |
| hsa-mir-302b   | genic, diff strand | LARP7                                                            | clus-302      |
| hsa-mir-302c   | genic, diff strand | LARP7                                                            | clus-302      |
| hsa-mir-302a   | genic, diff strand | LARP7                                                            | clus-302      |
| hsa-mir-302d   | genic, diff strand | LARP7                                                            | clus-302      |
| hsa-mir-367    | genic, diff strand | LARP7                                                            | clus-302      |
| hsa-mir-181a-2 | genic, diff strand | NR6A1                                                            | clus-181a-2   |
| hsa-mir-181b-2 | genic, diff strand | NR6A1                                                            | clus-181a-2   |
| hsa-mir-425    | genic, same strand | DALRD3                                                           | clus-191      |
| hsa-mir-767    | genic, same strand | GABRA3                                                           | clus-105      |
| hsa-mir-105-2  | genic, same strand | GABRA3                                                           | clus-105      |
| hsa-mir-105-1  | genic, same strand | GABRA3                                                           | clus-105      |
| hsa-mir-452    | genic, same strand | GABRE                                                            | clus-452      |
| hsa-mir-224    | genic, same strand | GABRE                                                            | clus-452      |
| hsa-let-7f-2   | genic, same strand | HUWE1                                                            | clus-let-7f-2 |
| hsa-mir-98     | genic, same strand | HUWE1                                                            | clus-let-7f-2 |
| hsa-mir-34c    | intergenic, < 10kb | 1099 bp downstream of BTG4, 1269 bp upstream of FLJ46266         | clus-34b      |
| hsa-mir-192    | intergenic, < 10kb | 12417 bp downstream of EHD1, 3300 bp upstream of KIAA0404        | clus-192      |
| hsa-mir-194-2  | intergenic, < 10kb | 12635 bp downstream of EHD1, 3107 bp upstream of KIAA0404        | clus-192      |
| hsa-mir-371    | intergenic, < 10kb | 150665 bp downstream of DPRX, 5861 bp upstream of NLRP12         | clus-371      |
| hsa-mir-372    | intergenic, < 10kb | 150880 bp downstream of DPRX, 5646 bp upstream of NLRP12         | clus-371      |
| hsa-mir-373    | intergenic, < 10kb | 151695 bp downstream of DPRX, 4829 bp upstream of NLRP12         | clus-371      |
| hsa-mir-200c   | intergenic, < 10kb | 2382 bp downstream of PTPN6, 1587 bp upstream of PHB2            | clus-200c     |
| hsa-mir-141    | intergenic, < 10kb | 2780 bp downstream of PTPN6, 1162 bp upstream of PHB2            | clus-200c     |
| hsa-mir-24-2   | intergenic, < 10kb | 4056 bp downstream of ZSWIM4, 45994 bp upstream of C19orf57      | clus-23a      |
| hsa-mir-27a    | intergenic, < 10kb | 4209 bp downstream of ZSWIM4, 45836 bp upstream of C19orf57      | clus-23a      |
| hsa-mir-181c   | intergenic, < 10kb | 42468 bp downstream of ZSWIM4, 7545 bp upstream of C19orf57      | clus-181c     |
| hsa-mir-181d   | intergenic, < 10kb | 42644 bp downstream of ZSWIM4, 7342 bp upstream of C19orf57      | clus-181c     |
| hsa-mir-23a    | intergenic, < 10kb | 4356 bp downstream of ZSWIM4, 45694 bp upstream of C19orf57      | clus-23a      |
| hsa-mir-34b    | intergenic, < 10kb | 598 bp downstream of BTG4, 1763 bp upstream of FLJ46266          | clus-34b      |
| hsa-mir-29c    | intergenic, < 10kb | 6339 bp downstream of CD46, 84599 bp upstream of CD34            | clus-29c      |
| hsa-mir-132    | intergenic, < 10kb | 6477 bp downstream of OVCA2, 5090 bp upstream of HIC1            | clus-212      |
| hsa-mir-212    | intergenic, < 10kb | 6840 bp downstream of OVCA2, 4718 bp upstream of HIC1            | clus-212      |
| hsa-mir-29b-2  | intergenic, < 10kb | 6930 bp downstream of CD46, 84015 bp upstream of CD34            | clus-29c      |
| hsa-mir-181b-1 | intergenic, > 10kb | 101456 bp downstream of PTPRC, 1168658 bp upstream of NR5A2      | clus-181b-1   |
| hsa-mir-181a-1 | intergenic, > 10kb | 101627 bp downstream of PTPRC, 1168487 bp upstream of NR5A2      | clus-181b-1   |
| hsa-mir-516-2  | intergenic, > 10kb | 124123 bp downstream of DPRX, 32380 bp upstream of NLRP12        | clus-516-2    |
| hsa-mir-519a-2 | intergenic, > 10kb | 125334 bp downstream of DPRX, 31172 bp upstream of NLRP12        | clus-516-2    |
| hsa-mir-506    | intergenic, > 10kb | 1400869 bp downstream of CXorf1, 681147 bp upstream of FMR1      | clus-507      |
| hsa-mir-507    | intergenic, > 10kb | 1401133 bp downstream of CXorf1, 680913 bp upstream of FMR1      | clus-507      |
| hsa-mir-29a    | intergenic, > 10kb | 142645 bp downstream of KLF14, 67351 bp upstream of FLJ43663     | clus-29a      |
| hsa-mir-29b-1  | intergenic, > 10kb | 143357 bp downstream of KLF14, 66622 bp upstream of FLJ43663     | clus-29a      |
| hsa-mir-514-1  | intergenic, > 10kb | 1449396 bp downstream of CXorf1, 632646 bp upstream of FMR1      | clus-514      |
| hsa-mir-514-2  | intergenic, > 10kb | 1452092 bp downstream of CXorf1, 629960 bp upstream of FMR1      | clus-514      |
| hsa-mir-514-3  | intergenic, > 10kb | 1454790 bp downstream of CXorf1, 627262 bp upstream of FMR1      | clus-514      |
| hsa-mir-127    | intergenic, > 10kb | 147858 bp downstream of DLK1, 122232 bp upstream of FLJ41170     | clus-127      |
| hsa-mir-432    | intergenic, > 10kb | 149362 bp downstream of DLK1, 120731 bp upstream of FLJ41170     | clus-127      |
| hsa-mir-136    | intergenic, > 10kb | 149581 bp downstream of DLK1, 120524 bp upstream of FLJ41170     | clus-127      |
| hsa-mir-379    | intergenic, > 10kb | 15033 bp downstream of FLJ41170, 539218 bp upstream of DIO3      | clus-379      |
| hsa-mir-411    | intergenic, > 10kb | 16292 bp downstream of FLJ41170, 537930 bp upstream of DIO3      | clus-379      |
| hsa-mir-299    | intergenic, > 10kb | 16761 bp downstream of FLJ41170, 537494 bp upstream of DIO3      | clus-379      |

|                |                    |                                                               |               |
|----------------|--------------------|---------------------------------------------------------------|---------------|
| hsa-mir-500    | intergenic, > 10kb | 174470 bp downstream of PAGE4, 59092 bp upstream of CLCN5     | clus-500      |
| hsa-mir-362    | intergenic, > 10kb | 175003 bp downstream of PAGE4, 58578 bp upstream of CLCN5     | clus-500      |
| hsa-mir-501    | intergenic, > 10kb | 175761 bp downstream of PAGE4, 57801 bp upstream of CLCN5     | clus-500      |
| hsa-mir-96     | intergenic, > 10kb | 17611 bp downstream of NRF1, 58385 bp upstream of UBE2H       | clus-183      |
| hsa-mir-183    | intergenic, > 10kb | 17824 bp downstream of NRF1, 58140 bp upstream of UBE2H       | clus-183      |
| hsa-mir-380    | intergenic, > 10kb | 17984 bp downstream of FLJ41170, 536273 bp upstream of DIO3   | clus-379      |
| hsa-mir-363    | intergenic, > 10kb | 183741 bp downstream of GPC3, 203859 bp upstream of PHF6      | clus-106a     |
| hsa-mir-92-2   | intergenic, > 10kb | 183901 bp downstream of GPC3, 203699 bp upstream of PHF6      | clus-106a     |
| hsa-mir-19b-2  | intergenic, > 10kb | 184034 bp downstream of GPC3, 203545 bp upstream of PHF6      | clus-106a     |
| hsa-mir-20b    | intergenic, > 10kb | 184172 bp downstream of GPC3, 203434 bp upstream of PHF6      | clus-106a     |
| hsa-mir-18b    | intergenic, > 10kb | 184404 bp downstream of GPC3, 203200 bp upstream of PHF6      | clus-106a     |
| hsa-mir-106a   | intergenic, > 10kb | 184561 bp downstream of GPC3, 203033 bp upstream of PHF6      | clus-106a     |
| hsa-mir-323    | intergenic, > 10kb | 18699 bp downstream of FLJ41170, 535533 bp upstream of DIO3   | clus-379      |
| hsa-mir-368    | intergenic, > 10kb | 32657 bp downstream of FLJ41170, 521595 bp upstream of DIO3   | clus-368      |
| hsa-mir-376a-2 | intergenic, > 10kb | 33036 bp downstream of FLJ41170, 521202 bp upstream of DIO3   | clus-368      |
| hsa-mir-654    | intergenic, > 10kb | 33186 bp downstream of FLJ41170, 521051 bp upstream of DIO3   | clus-368      |
| hsa-mir-376b   | intergenic, > 10kb | 33403 bp downstream of FLJ41170, 520815 bp upstream of DIO3   | clus-368      |
| hsa-mir-376a-1 | intergenic, > 10kb | 33749 bp downstream of FLJ41170, 520501 bp upstream of DIO3   | clus-368      |
| hsa-mir-450-1  | intergenic, > 10kb | 39674 bp downstream of HPRT1, 25411 bp upstream of PLAC1      | clus-450      |
| hsa-mir-450-2  | intergenic, > 10kb | 39841 bp downstream of HPRT1, 25235 bp upstream of PLAC1      | clus-450      |
| hsa-mir-503    | intergenic, > 10kb | 45661 bp downstream of HPRT1, 19444 bp upstream of PLAC1      | clus-424      |
| hsa-mir-424    | intergenic, > 10kb | 45947 bp downstream of HPRT1, 19131 bp upstream of PLAC1      | clus-424      |
| hsa-mir-382    | intergenic, > 10kb | 47273 bp downstream of FLJ41170, 506969 bp upstream of DIO3   | clus-382      |
| hsa-mir-134    | intergenic, > 10kb | 47654 bp downstream of FLJ41170, 506591 bp upstream of DIO3   | clus-382      |
| hsa-mir-143    | intergenic, > 10kb | 49642 bp downstream of IL17B, 66258 bp upstream of CSNK1A1    | clus-143      |
| hsa-mir-200b   | intergenic, > 10kb | 51014 bp downstream of C1orf159, 12498 bp upstream of TTLL10  | clus-200b     |
| hsa-mir-145    | intergenic, > 10kb | 51370 bp downstream of IL17B, 64548 bp upstream of CSNK1A1    | clus-143      |
| hsa-mir-200a   | intergenic, > 10kb | 51773 bp downstream of C1orf159, 11744 bp upstream of TTLL10  | clus-200b     |
| hsa-mir-154    | intergenic, > 10kb | 52722 bp downstream of FLJ41170, 501512 bp upstream of DIO3   | clus-154      |
| hsa-mir-429    | intergenic, > 10kb | 52915 bp downstream of C1orf159, 10609 bp upstream of TTLL10  | clus-200b     |
| hsa-mir-496    | intergenic, > 10kb | 53540 bp downstream of FLJ41170, 500676 bp upstream of DIO3   | clus-154      |
| hsa-mir-221    | intergenic, > 10kb | 545438 bp downstream of CXorf36, 701066 bp upstream of ZNF673 | clus-221      |
| hsa-mir-222    | intergenic, > 10kb | 546274 bp downstream of CXorf36, 700230 bp upstream of ZNF673 | clus-221      |
| hsa-mir-377    | intergenic, > 10kb | 55017 bp downstream of FLJ41170, 499232 bp upstream of DIO3   | clus-154      |
| hsa-let-7a-3   | intergenic, > 10kb | 58604 bp downstream of C22orf26, 37796 bp upstream of PPARA   | clus-let-7a-3 |
| hsa-let-7b     | intergenic, > 10kb | 59541 bp downstream of C22orf26, 36850 bp upstream of PPARA   | clus-let-7a-3 |
| hsa-mir-99b    | intergenic, > 10kb | 62146 bp downstream of SIGLEC5, 20430 bp upstream of HAS1     | clus-99b      |
| hsa-let-7e     | intergenic, > 10kb | 62320 bp downstream of SIGLEC5, 20247 bp upstream of HAS1     | clus-99b      |
| hsa-mir-125a   | intergenic, > 10kb | 62788 bp downstream of SIGLEC5, 19772 bp upstream of HAS1     | clus-99b      |
| hsa-let-7a-1   | intergenic, > 10kb | 66102 bp downstream of PTPDC1, 83259 bp upstream of ZNF169    | clus-let-7a-1 |
| hsa-let-7f-1   | intergenic, > 10kb | 66492 bp downstream of PTPDC1, 82862 bp upstream of ZNF169    | clus-let-7a-1 |
| hsa-mir-526a-1 | intergenic, > 10kb | 69242 bp downstream of DPRX, 87266 bp upstream of NLRP12      | clus-526a-1   |
| hsa-mir-520c   | intergenic, > 10kb | 70443 bp downstream of DPRX, 86063 bp upstream of NLRP12      | clus-526a-1   |
| hsa-mir-518c   | intergenic, > 10kb | 71725 bp downstream of DPRX, 84767 bp upstream of NLRP12      | clus-526a-1   |
| hsa-mir-524    | intergenic, > 10kb | 73992 bp downstream of DPRX, 82514 bp upstream of NLRP12      | clus-526a-1   |
| hsa-mir-517a   | intergenic, > 10kb | 75258 bp downstream of DPRX, 81248 bp upstream of NLRP12      | clus-526a-1   |
| hsa-mir-519d   | intergenic, > 10kb | 76337 bp downstream of DPRX, 80168 bp upstream of NLRP12      | clus-526a-1   |
