# Supplementary material for: Dissecting microregulation of a master regulatory network
Source: PubMed Central journal article supplement (PMC2289817; doi:10.1186/1471-2164-9-88), 2008-02-23
Supplement: 1471-2164-9-88-S8.pdf [file 1471-2164-9-88-S8.pdf]

**Additional File 8:** List of miRNAs that are reported in the literature as either up or down regulated in various human cancers or cancer cell lines. The target genes indicate only those that have been experimentally supported (from Tarbase <http://www.diana.pcbi.upenn.edu/tarbase.html>).

| Cancer                              | miRNA         | Up/Down | TargetGenes | Reference                                          |
|-------------------------------------|---------------|---------|-------------|----------------------------------------------------|
| Colorectal neoplasia                | hsa-miR-133b  | Down    |             | Bandres et al., 2006                               |
| Colorectal neoplasia                | hsa-miR-145   | Down    |             | Bandres et al., 2006                               |
| Chronic lymphocytic leukemia        | hsa-miR-15    | Down    | BCL2        | Calin et al., 2004; Cimmino et al., 2005           |
| Chronic lymphocytic leukemia        | hsa-miR-16    | Down    | BCL2        | Calin et al., 2004; Cimmino et al., 2005           |
| Glioblastoma                        | hsa-miR-181a  | Down    |             | Ciafre et al., 2005                                |
| Glioblastoma                        | hsa-miR-30c   | Down    |             | Ciafre et al., 2005                                |
| Brain cancer                        | hsa-miR-181   | Down    |             | Ciafre et al., 2005; Chan et al., 2005             |
| B-cell lymphoma                     | hsa-miR-16-1  | Down    |             | Eis et al., 2005                                   |
| Cervix cancer                       | hsa-miR-145   | Down    |             | Esquela-Kerscher and Slack, 2006                   |
| Cervix cancer                       | hsa-miR-143   | Down    | MAPK7       | Esquela-Kerscher and Slack, 2006; Lui et al., 2007 |
| CNS Tumor-derived cell line         | hsa-let-7d    | Down    |             | Gaur et al, 2007                                   |
| CNS Tumor-derived cell line         | hsa-let-7g    | Down    |             | Gaur et al, 2007                                   |
| CNS Tumor-derived cell line         | hsa-let-7i    | Down    |             | Gaur et al, 2007                                   |
| CNS Tumor-derived cell line         | hsa-miR-103   | Down    |             | Gaur et al, 2007                                   |
| CNS Tumor-derived cell line         | hsa-miR-107   | Down    |             | Gaur et al, 2007                                   |
| Hematologic Tumor-derived cell line | hsa-miR-10a   | Down    |             | Gaur et al, 2007                                   |
| CNS Tumor-derived cell line         | hsa-miR-124a  | Down    |             | Gaur et al, 2007                                   |
| CNS Tumor-derived cell line         | hsa-miR-128a  | Down    |             | Gaur et al, 2007                                   |
| CNS Tumor-derived cell line         | hsa-miR-128b  | Down    |             | Gaur et al, 2007                                   |
| CNS Tumor-derived cell line         | hsa-miR-129   | Down    |             | Gaur et al, 2007                                   |
| ColonTumor-derived cell line        | hsa-miR-130a  | Down    |             | Gaur et al, 2007                                   |
| CNS Tumor-derived cell line         | hsa-miR-134   | Down    |             | Gaur et al, 2007                                   |
| CNS Tumor-derived cell line         | hsa-miR-135a  | Down    |             | Gaur et al, 2007                                   |
| CNS Tumor-derived cell line         | hsa-miR-137   | Down    |             | Gaur et al, 2007                                   |
| CNS Tumor-derived cell line         | hsa-miR-138   | Down    |             | Gaur et al, 2007                                   |
| ColonTumor-derived cell line        | hsa-miR-148a  | Down    |             | Gaur et al, 2007                                   |
| CNS Tumor-derived cell line         | hsa-miR-148b  | Down    |             | Gaur et al, 2007                                   |
| CNS Tumor-derived cell line         | hsa-miR-149   | Down    |             | Gaur et al, 2007                                   |
| CNS Tumor-derived cell line         | hsa-miR-153   | Down    |             | Gaur et al, 2007                                   |
| ColonTumor-derived cell line        | hsa-miR-15a   | Down    |             | Gaur et al, 2007                                   |
| CNS Tumor-derived cell line         | hsa-miR-17-3p | Down    |             | Gaur et al, 2007                                   |
| CNS Tumor-derived cell line         | hsa-miR-181a  | Down    |             | Gaur et al, 2007                                   |
| CNS Tumor-derived cell line         | hsa-miR-181a  | Down    |             | Gaur et al, 2007                                   |
| CNS Tumor-derived cell line         | hsa-miR-181b  | Down    |             | Gaur et al, 2007                                   |
| CNS Tumor-derived cell line         | hsa-miR-181c  | Down    |             | Gaur et al, 2007                                   |
| CNS Tumor-derived cell line         | hsa-miR-187   | Down    |             | Gaur et al, 2007                                   |
| CNS Tumor-derived cell line         | hsa-miR-191   | Down    |             | Gaur et al, 2007                                   |

|                                     |                |      |  |                  |
|-------------------------------------|----------------|------|--|------------------|
| CNS Tumor-derived cell line         | hsa-miR-192    | Down |  | Gaur et al, 2007 |
| CNS Tumor-derived cell line         | hsa-miR-194    | Down |  | Gaur et al, 2007 |
| Hematologic Tumor-derived cell line | hsa-miR-196b   | Down |  | Gaur et al, 2007 |
| CNS Tumor-derived cell line         | hsa-miR-197    | Down |  | Gaur et al, 2007 |
| CNS Tumor-derived cell line         | hsa-miR-203    | Down |  | Gaur et al, 2007 |
| CNS Tumor-derived cell line         | hsa-miR-20a    | Down |  | Gaur et al, 2007 |
| CNS Tumor-derived cell line         | hsa-miR-212    | Down |  | Gaur et al, 2007 |
| ColonTumor-derived cell line        | hsa-miR-214    | Down |  | Gaur et al, 2007 |
| CNS Tumor-derived cell line         | hsa-miR-219    | Down |  | Gaur et al, 2007 |
| CNS Tumor-derived cell line         | hsa-miR-26b    | Down |  | Gaur et al, 2007 |
| Hematologic Tumor-derived cell line | hsa-miR-27b    | Down |  | Gaur et al, 2007 |
| Hematologic Tumor-derived cell line | hsa-miR-28     | Down |  | Gaur et al, 2007 |
| CNS Tumor-derived cell line         | hsa-miR-30b    | Down |  | Gaur et al, 2007 |
| CNS Tumor-derived cell line         | hsa-miR-30b    | Down |  | Gaur et al, 2007 |
| CNS Tumor-derived cell line         | hsa-miR-30c    | Down |  | Gaur et al, 2007 |
| CNS Tumor-derived cell line         | hsa-miR-30d    | Down |  | Gaur et al, 2007 |
| CNS Tumor-derived cell line         | hsa-miR-32     | Down |  | Gaur et al, 2007 |
| CNS Tumor-derived cell line         | hsa-miR-323    | Down |  | Gaur et al, 2007 |
| CNS Tumor-derived cell line         | hsa-miR-324-3p | Down |  | Gaur et al, 2007 |
| CNS Tumor-derived cell line         | hsa-miR-324-5p | Down |  | Gaur et al, 2007 |
| CNS Tumor-derived cell line         | hsa-miR-328    | Down |  | Gaur et al, 2007 |
| CNS Tumor-derived cell line         | hsa-miR-330    | Down |  | Gaur et al, 2007 |
| CNS Tumor-derived cell line         | hsa-miR-331    | Down |  | Gaur et al, 2007 |
| CNS Tumor-derived cell line         | hsa-miR-338    | Down |  | Gaur et al, 2007 |
| CNS Tumor-derived cell line         | hsa-miR-340    | Down |  | Gaur et al, 2007 |
| CNS Tumor-derived cell line         | hsa-miR-345    | Down |  | Gaur et al, 2007 |
| CNS Tumor-derived cell line         | hsa-miR-346    | Down |  | Gaur et al, 2007 |
| CNS Tumor-derived cell line         | hsa-miR-34a    | Down |  | Gaur et al, 2007 |
| CNS Tumor-derived cell line         | hsa-miR-34a    | Down |  | Gaur et al, 2007 |
| CNS Tumor-derived cell line         | hsa-miR-361    | Down |  | Gaur et al, 2007 |
| CNS Tumor-derived cell line         | hsa-miR-370    | Down |  | Gaur et al, 2007 |
| ColonTumor-derived cell line        | hsa-miR-378    | Down |  | Gaur et al, 2007 |
| CNS Tumor-derived cell line         | hsa-miR-382    | Down |  | Gaur et al, 2007 |
| CNS Tumor-derived cell line         | hsa-miR-383    | Down |  | Gaur et al, 2007 |
| ColonTumor-derived cell line        | hsa-miR-422a   | Down |  | Gaur et al, 2007 |
| ColonTumor-derived cell line        | hsa-miR-424    | Down |  | Gaur et al, 2007 |
| CNS Tumor-derived cell line         | hsa-miR-425    | Down |  | Gaur et al, 2007 |
| CNS Tumor-derived cell line         | hsa-miR-7      | Down |  | Gaur et al, 2007 |

|                             |               |      |  |                        |
|-----------------------------|---------------|------|--|------------------------|
| CNS Tumor-derived cell line | hsa-miR-7     | Down |  | Gaur et al, 2007       |
| CNS Tumor-derived cell line | hsa-miR-98    | Down |  | Gaur et al, 2007       |
| B-cell lymphoma             | hsa-miR-143   | Down |  | He et al., 2005        |
| B-cell lymphoma             | hsa-miR-17-3p | Down |  | He et al., 2005        |
| Breast cancer               | hsa-miR-10b   | Down |  | Iorio et al., 2005     |
| Breast cancer               | hsa-miR-125b  | Down |  | Iorio et al., 2005     |
| Breast cancer               | hsa-miR-145   | Down |  | Iorio et al., 2005     |
| Colon cancer                | hsa-miR-130a  | Down |  | Lu et al, 2005         |
| Colon cancer                | hsa-miR-181a  | Down |  | Lu et al, 2005         |
| Colorectal neoplasia        | hsa-miR-143   | Down |  | Michael et al., 2003   |
| Colorectal neoplasia        | hsa-miR-145   | Down |  | Michael et al., 2003   |
| Hepatocellular carcinoma    | hsa-miR-125   | Down |  | Murakami et al., 2006  |
| Hepatocellular carcinoma    | hsa-miR-18    | Down |  | Murakami et al., 2006  |
| Hepatocellular carcinoma    | hsa-miR-195   | Down |  | Murakami et al., 2006  |
| Hepatocellular carcinoma    | hsa-miR-199   | Down |  | Murakami et al., 2006  |
| Hepatocellular carcinoma    | hsa-miR-200   | Down |  | Murakami et al., 2006  |
| Hepatocellular carcinoma    | hsa-miR-224   | Down |  | Murakami et al., 2006  |
| B-cell lymphoma             | hsa-miR-145   | Down |  | O'Donnell et al., 2005 |
| Renal cancer                | hsa-miR-23b   | Down |  | O'Rourke et al., 2006  |
| Renal cancer                | hsa-miR-24-1  | Down |  | O'Rourke et al., 2006  |
| Prostate cancer             | hsa-let-7a    | Down |  | Porkka et al., 2007    |
| Prostate cancer             | hsa-let-7b    | Down |  | Porkka et al., 2007    |
| Prostate cancer             | hsa-let-7c    | Down |  | Porkka et al., 2007    |
| Prostate cancer             | hsa-let-7d    | Down |  | Porkka et al., 2007    |
| Prostate cancer             | hsa-let-7f    | Down |  | Porkka et al., 2007    |
| Prostate cancer             | hsa-let-7g    | Down |  | Porkka et al., 2007    |
| Prostate cancer             | hsa-miR-100   | Down |  | Porkka et al., 2007    |
| Prostate cancer             | hsa-miR-103   | Down |  | Porkka et al., 2007    |
| Prostate cancer             | hsa-miR-125a  | Down |  | Porkka et al., 2007    |
| Prostate cancer             | hsa-miR-125b  | Down |  | Porkka et al., 2007    |
| Prostate cancer             | hsa-miR-141   | Down |  | Porkka et al., 2007    |
| Prostate cancer             | hsa-miR-143   | Down |  | Porkka et al., 2007    |
| Prostate cancer             | hsa-miR-145   | Down |  | Porkka et al., 2007    |
| Prostate cancer             | hsa-miR-148a  | Down |  | Porkka et al., 2007    |
| Prostate cancer             | hsa-miR-16    | Down |  | Porkka et al., 2007    |
| Prostate cancer             | hsa-miR-195   | Down |  | Porkka et al., 2007    |
| Prostate cancer             | hsa-miR-199a  | Down |  | Porkka et al., 2007    |
| Prostate cancer             | hsa-miR-199a* | Down |  | Porkka et al., 2007    |
| Prostate cancer             | hsa-miR-19b   | Down |  | Porkka et al., 2007    |
| Prostate cancer             | hsa-miR-205   | Down |  | Porkka et al., 2007    |

|                                                             |                |      |          |                                                                                               |
|-------------------------------------------------------------|----------------|------|----------|-----------------------------------------------------------------------------------------------|
| Prostate cancer                                             | hsa-miR-22     | Down |          | Porkka et al., 2007                                                                           |
| Prostate cancer                                             | hsa-miR-221    | Down |          | Porkka et al., 2007                                                                           |
| Prostate cancer                                             | hsa-miR-222    | Down |          | Porkka et al., 2007                                                                           |
| Prostate cancer                                             | hsa-miR-23a    | Down |          | Porkka et al., 2007                                                                           |
| Prostate cancer                                             | hsa-miR-23b    | Down |          | Porkka et al., 2007                                                                           |
| Prostate cancer                                             | hsa-miR-26a    | Down |          | Porkka et al., 2007                                                                           |
| Prostate cancer                                             | hsa-miR-26b    | Down |          | Porkka et al., 2007                                                                           |
| Prostate cancer                                             | hsa-miR-27a    | Down |          | Porkka et al., 2007                                                                           |
| Prostate cancer                                             | hsa-miR-27b    | Down |          | Porkka et al., 2007                                                                           |
| Prostate cancer                                             | hsa-miR-29a    | Down |          | Porkka et al., 2007                                                                           |
| Prostate cancer                                             | hsa-miR-29b    | Down |          | Porkka et al., 2007                                                                           |
| Prostate cancer                                             | hsa-miR-30a-5p | Down |          | Porkka et al., 2007                                                                           |
| Prostate cancer                                             | hsa-miR-30b    | Down |          | Porkka et al., 2007                                                                           |
| Prostate cancer                                             | hsa-miR-30c    | Down |          | Porkka et al., 2007                                                                           |
| Prostate cancer                                             | hsa-miR-497    | Down |          | Porkka et al., 2007                                                                           |
| Prostate cancer                                             | hsa-miR-92     | Down |          | Porkka et al., 2007                                                                           |
| Prostate cancer                                             | hsa-miR-99a    | Down |          | Porkka et al., 2007                                                                           |
| Lung cancer                                                 | hsa-let-7      | Down | RAS, MYC | Takamizawa et al., 2004; Johnson et al., 2005; Hayashita et al., 2005; O'Donnell et al., 2005 |
| Head and neck cancer cell lines                             | hsa-miR-127    | Down |          | Tran et al., 2007                                                                             |
| Head and neck cancer cell lines                             | hsa-miR-133a   | Down |          | Tran et al., 2007                                                                             |
| Head and neck cancer cell lines                             | hsa-miR-133b   | Down |          | Tran et al., 2007                                                                             |
| Head and neck cancer cell lines                             | hsa-miR-154    | Down |          | Tran et al., 2007                                                                             |
| Head and neck cancer cell lines                             | hsa-miR-200c   | Down |          | Tran et al., 2007                                                                             |
| Head and neck cancer cell lines                             | hsa-miR-212    | Down |          | Tran et al., 2007                                                                             |
| Head and neck cancer cell lines                             | hsa-miR-302b   | Down |          | Tran et al., 2007                                                                             |
| Head and neck cancer cell lines                             | hsa-miR-302c   | Down |          | Tran et al., 2007                                                                             |
| Head and neck cancer cell lines                             | hsa-miR-302d   | Down |          | Tran et al., 2007                                                                             |
| Head and neck cancer cell lines                             | hsa-miR-328    | Down |          | Tran et al., 2007                                                                             |
| Head and neck cancer cell lines                             | hsa-miR-340    | Down |          | Tran et al., 2007                                                                             |
| Head and neck cancer cell lines                             | hsa-miR-342    | Down |          | Tran et al., 2007                                                                             |
| Head and neck cancer cell lines                             | hsa-miR-345    | Down |          | Tran et al., 2007                                                                             |
| Head and neck cancer cell lines                             | hsa-miR-346    | Down |          | Tran et al., 2007                                                                             |
| Head and neck cancer cell lines                             | hsa-miR-371    | Down |          | Tran et al., 2007                                                                             |
| Head and neck cancer cell lines                             | hsa-miR-373    | Down |          | Tran et al., 2007                                                                             |
| Head and neck cancer cell lines                             | hsa-miR-375    | Down |          | Tran et al., 2007                                                                             |
| Head and neck cancer cell lines                             | hsa-miR-378    | Down |          | Tran et al., 2007                                                                             |
| Head and neck cancer cell lines                             | hsa-miR-382    | Down |          | Tran et al., 2007                                                                             |
| Head and neck cancer cell lines                             | hsa-miR-449    | Down |          | Tran et al., 2007                                                                             |
| Breast, colon, lung, pancreas, prostate, and stomach cancer | hsa-let-7a-3   | Down |          | Volinia et al., 2006                                                                          |

|                                                      |                |      |  |                      |
|------------------------------------------------------|----------------|------|--|----------------------|
| Breast, colon, lung, pancreas, prostate, and stomach | hsa-let-7g     | Down |  | Volinia et al., 2006 |
| Breast, colon, lung, pancreas, prostate, and stomach | hsa-miR-125a   | Down |  | Volinia et al., 2006 |
| Breast, colon, lung, pancreas, prostate, and stomach | hsa-miR-128b   | Down |  | Volinia et al., 2006 |
| Breast, colon, lung, pancreas, prostate, and stomach | hsa-miR-132    | Down |  | Volinia et al., 2006 |
| Breast, colon, lung, pancreas, prostate, and stomach | hsa-miR-141    | Down |  | Volinia et al., 2006 |
| Breast, colon, lung, pancreas, prostate, and stomach | hsa-miR-16-1   | Down |  | Volinia et al., 2006 |
| Breast, colon, lung, pancreas, prostate, and stomach | hsa-miR-16-2   | Down |  | Volinia et al., 2006 |
| Breast, colon, lung, pancreas, prostate, and stomach | hsa-miR-17-5p  | Down |  | Volinia et al., 2006 |
| Breast, colon, lung, pancreas, prostate, and stomach | hsa-miR-191    | Down |  | Volinia et al., 2006 |
| Breast, colon, lung, pancreas, prostate, and stomach | hsa-miR-195    | Down |  | Volinia et al., 2006 |
| Breast, colon, lung, pancreas, prostate, and stomach | hsa-miR-199a-1 | Down |  | Volinia et al., 2006 |
| Breast, colon, lung, pancreas, prostate, and stomach | hsa-miR-199a-2 | Down |  | Volinia et al., 2006 |
| Breast, colon, lung, pancreas, prostate, and stomach | hsa-miR-199b   | Down |  | Volinia et al., 2006 |
| Breast, colon, lung, pancreas, prostate, and stomach | hsa-miR-200b   | Down |  | Volinia et al., 2006 |
| Breast, colon, lung, pancreas, prostate, and stomach | hsa-miR-20a    | Down |  | Volinia et al., 2006 |
| Breast, colon, lung, pancreas, prostate, and stomach | hsa-miR-24-2   | Down |  | Volinia et al., 2006 |
| Breast, colon, lung, pancreas, prostate, and stomach | hsa-miR-27a    | Down |  | Volinia et al., 2006 |
| Breast, colon, lung, pancreas, prostate, and stomach | hsa-miR-29a    | Down |  | Volinia et al., 2006 |
| Breast, colon, lung, pancreas, prostate, and stomach | hsa-miR-29b-2  | Down |  | Volinia et al., 2006 |
| Breast, colon, lung, pancreas, prostate, and stomach | hsa-miR-29c    | Down |  | Volinia et al., 2006 |
| Breast, colon, lung, pancreas, prostate, and stomach | hsa-miR-34a    | Down |  | Volinia et al., 2006 |
| Breast, colon, lung, pancreas, prostate, and stomach | hsa-miR-9-1    | Down |  | Volinia et al., 2006 |
| Breast, colon, lung, pancreas, prostate, and stomach | hsa-miR-95     | Down |  | Volinia et al., 2006 |
| Colorectal neoplasia                                 | hsa-miR-135b   | Up   |  | Bandres et al., 2006 |
| Colorectal neoplasia                                 | hsa-miR-183    | Up   |  | Bandres et al., 2006 |
| Colorectal neoplasia                                 | hsa-miR-31     | Up   |  | Bandres et al., 2006 |
| Colorectal neoplasia                                 | hsa-miR-96     | Up   |  | Bandres et al., 2006 |

|                              |               |    |     |                                                         |
|------------------------------|---------------|----|-----|---------------------------------------------------------|
| Glioblastoma                 | hsa-miR-10b   | Up |     | Chan et al., 2005                                       |
| Breast cancer                | hsa-miR-21    | Up |     | Chan et al., 2005                                       |
| Colon cancer                 | hsa-miR-21    | Up |     | Chan et al., 2005                                       |
| Glioblastoma                 | hsa-miR-21    | Up |     | Chan et al., 2005                                       |
| Lung cancer                  | hsa-miR-21    | Up |     | Chan et al., 2005                                       |
| Pancreatic Cancer            | hsa-miR-21    | Up |     | Chan et al., 2005                                       |
| Prostate cancer              | hsa-miR-21    | Up |     | Chan et al., 2005                                       |
| Stomach cancer               | hsa-miR-21    | Up |     | Chan et al., 2005                                       |
| Brain cancer                 | hsa-miR-21    | Up |     | Ciafre et al., 2005; Chan et al., 2005                  |
| Brain cancer                 | hsa-miR-221   | Up |     | Ciafre et al., 2005; Chan et al., 2005                  |
| B-cell lymphoma              | hsa-miR-19a   | Up |     | Eis et al., 2005                                        |
| Lymphomas                    | hsa-miR-155   | Up | BIC | Eis et al., 2005; Metzler et al., 2004; He et al., 2005 |
| Lymphomas                    | hsa-miR-17    | Up | BIC | Eis et al., 2005; Metzler et al., 2004; He et al., 2005 |
| Lymphomas                    | hsa-miR-18a   | Up | BIC | Eis et al., 2005; Metzler et al., 2004; He et al., 2005 |
| Lymphomas                    | hsa-miR-19a   | Up | BIC | Eis et al., 2005; Metzler et al., 2004; He et al., 2005 |
| Lymphomas                    | hsa-miR-19b-1 | Up | BIC | Eis et al., 2005; Metzler et al., 2004; He et al., 2005 |
| Lymphomas                    | hsa-miR-20a   | Up | BIC | Eis et al., 2005; Metzler et al., 2004; He et al., 2005 |
| Lymphomas                    | hsa-miR-92-1  | Up | BIC | Eis et al., 2005; Metzler et al., 2004; He et al., 2005 |
| B-cell lymphoma              | hsa-miR-155   | Up |     | Esquela-Kerscher and Slack, 2006                        |
| B-cell lymphoma              | hsa-miR-221   | Up |     | Esquela-Kerscher and Slack, 2006                        |
| B-cell lymphoma              | hsa-miR-222   | Up |     | Esquela-Kerscher and Slack, 2006                        |
| CNS Tumor-derived cell line  | hsa-miR-10a   | Up |     | Gaur et al, 2007                                        |
| CNS Tumor-derived cell line  | hsa-miR-196a  | Up |     | Gaur et al, 2007                                        |
| CNS Tumor-derived cell line  | hsa-miR-196b  | Up |     | Gaur et al, 2007                                        |
| Thyroid cancer               | hsa-miR-146   | Up |     | He et al., 2005                                         |
| Thyroid cancer               | hsa-miR-221   | Up |     | He et al., 2005                                         |
| B-cell lymphoma              | hsa-miR-92    | Up |     | He et al., 2005                                         |
| Papillary thyroid carcinoma  | hsa-miR-146   | Up | KIT | He et al., 2005b; Pallante et al., 2006                 |
| Papillary thyroid carcinoma  | hsa-miR-181   | Up | KIT | He et al., 2005b; Pallante et al., 2006                 |
| Papillary thyroid carcinoma  | hsa-miR-221   | Up | KIT | He et al., 2005b; Pallante et al., 2006                 |
| Papillary thyroid carcinoma  | hsa-miR-222   | Up | KIT | He et al., 2005b; Pallante et al., 2006                 |
| Breast cancer                | hsa-miR-155   | Up |     | Iorio et al., 2005                                      |
| Breast cancer                | hsa-miR-21    | Up |     | Iorio et al., 2005                                      |
| Cervix cancer                | hsa-miR-21    | Up |     | Lui et al., 2007                                        |
| Cholangiocarcinoma cell line | hsa-miR-141   | Up |     | Meng et al., 2006                                       |
| Cholangiocarcinoma cell line | hsa-miR-200b  | Up |     | Meng et al., 2006                                       |
| Cholangiocarcinoma cell line | hsa-miR-21    | Up |     | Meng et al., 2006                                       |
| Lung cancer                  | hsa-miR-205   | Up |     | Michael et al., 2003                                    |
| B-cell lymphoma              | hsa-miR-142   | Up |     | O'Donnell et al., 2005                                  |
| Prostate cancer              | hsa-miR-184   | Up |     | Porkka et al., 2007                                     |

|                                 |               |    |          |                                                                                               |
|---------------------------------|---------------|----|----------|-----------------------------------------------------------------------------------------------|
| Prostate cancer                 | hsa-miR-198   | Up |          | Porkka et al., 2007                                                                           |
| Prostate cancer                 | hsa-miR-202   | Up |          | Porkka et al., 2007                                                                           |
| Prostate cancer                 | hsa-miR-210   | Up |          | Porkka et al., 2007                                                                           |
| Prostate cancer                 | hsa-miR-296   | Up |          | Porkka et al., 2007                                                                           |
| Prostate cancer                 | hsa-miR-302c* | Up |          | Porkka et al., 2007                                                                           |
| Prostate cancer                 | hsa-miR-320   | Up |          | Porkka et al., 2007                                                                           |
| Prostate cancer                 | hsa-miR-345   | Up |          | Porkka et al., 2007                                                                           |
| Prostate cancer                 | hsa-miR-370   | Up |          | Porkka et al., 2007                                                                           |
| Prostate cancer                 | hsa-miR-373*  | Up |          | Porkka et al., 2007                                                                           |
| Prostate cancer                 | hsa-miR-491   | Up |          | Porkka et al., 2007                                                                           |
| Prostate cancer                 | hsa-miR-498   | Up |          | Porkka et al., 2007                                                                           |
| Prostate cancer                 | hsa-miR-503   | Up |          | Porkka et al., 2007                                                                           |
| Prostate cancer                 | hsa-miR-513   | Up |          | Porkka et al., 2007                                                                           |
| Lung cancer                     | hsa-miR-17    | Up | RAS, MYC | Takamizawa et al., 2004; Johnson et al., 2005; Hayashita et al., 2005; O'Donnell et al., 2005 |
| Lung cancer                     | hsa-miR-18a   | Up | RAS, MYC | Takamizawa et al., 2004; Johnson et al., 2005; Hayashita et al., 2005; O'Donnell et al., 2005 |
| Lung cancer                     | hsa-miR-19a   | Up | RAS, MYC | Takamizawa et al., 2004; Johnson et al., 2005; Hayashita et al., 2005; O'Donnell et al., 2005 |
| Lung cancer                     | hsa-miR-19b-1 | Up | RAS, MYC | Takamizawa et al., 2004; Johnson et al., 2005; Hayashita et al., 2005; O'Donnell et al., 2005 |
| Lung cancer                     | hsa-miR-20a   | Up | RAS, MYC | Takamizawa et al., 2004; Johnson et al., 2005; Hayashita et al., 2005; O'Donnell et al., 2005 |
| Lung cancer                     | hsa-miR-92-1  | Up | RAS, MYC | Takamizawa et al., 2004; Johnson et al., 2005; Hayashita et al., 2005; O'Donnell et al., 2005 |
| Head and neck cancer cell lines | hsa-let-7a    | Up |          | Tran et al., 2007                                                                             |
| Head and neck cancer cell lines | hsa-let-7b    | Up |          | Tran et al., 2007                                                                             |
| Head and neck cancer cell lines | hsa-let-7c    | Up |          | Tran et al., 2007                                                                             |
| Head and neck cancer cell lines | hsa-let-7d    | Up |          | Tran et al., 2007                                                                             |
| Head and neck cancer cell lines | hsa-let-7f    | Up |          | Tran et al., 2007                                                                             |
| Head and neck cancer cell lines | hsa-miR-100   | Up |          | Tran et al., 2007                                                                             |
| Head and neck cancer cell lines | hsa-miR-103   | Up |          | Tran et al., 2007                                                                             |
| Head and neck cancer cell lines | hsa-miR-107   | Up |          | Tran et al., 2007                                                                             |
| Head and neck cancer cell lines | hsa-miR-125b  | Up |          | Tran et al., 2007                                                                             |
| Head and neck cancer cell lines | hsa-miR-15a   | Up |          | Tran et al., 2007                                                                             |
| Head and neck cancer cell lines | hsa-miR-15b   | Up |          | Tran et al., 2007                                                                             |
| Head and neck cancer cell lines | hsa-miR-16    | Up |          | Tran et al., 2007                                                                             |
| Head and neck cancer cell lines | hsa-miR-18    | Up |          | Tran et al., 2007                                                                             |
| Head and neck cancer cell lines | hsa-miR-19a   | Up |          | Tran et al., 2007                                                                             |
| Head and neck cancer cell lines | hsa-miR-200a  | Up |          | Tran et al., 2007                                                                             |

|                                                      |                |    |        |                      |
|------------------------------------------------------|----------------|----|--------|----------------------|
| Head and neck cancer cell lines                      | hsa-miR-200b   | Up |        | Tran et al., 2007    |
| Head and neck cancer cell lines                      | hsa-miR-205    | Up |        | Tran et al., 2007    |
| Head and neck cancer cell lines                      | hsa-miR-21     | Up |        | Tran et al., 2007    |
| Head and neck cancer cell lines                      | hsa-miR-22     | Up |        | Tran et al., 2007    |
| Head and neck cancer cell lines                      | hsa-miR-221    | Up |        | Tran et al., 2007    |
| Head and neck cancer cell lines                      | hsa-miR-23a    | Up |        | Tran et al., 2007    |
| Head and neck cancer cell lines                      | hsa-miR-23b    | Up |        | Tran et al., 2007    |
| Head and neck cancer cell lines                      | hsa-miR-24     | Up |        | Tran et al., 2007    |
| Head and neck cancer cell lines                      | hsa-miR-27a    | Up |        | Tran et al., 2007    |
| Head and neck cancer cell lines                      | hsa-miR-28     | Up |        | Tran et al., 2007    |
| Head and neck cancer cell lines                      | hsa-miR-29b    | Up |        | Tran et al., 2007    |
| Head and neck cancer cell lines                      | hsa-miR-30b    | Up |        | Tran et al., 2007    |
| Head and neck cancer cell lines                      | hsa-miR-31     | Up |        | Tran et al., 2007    |
| Head and neck cancer cell lines                      | hsa-miR-320    | Up |        | Tran et al., 2007    |
| Head and neck cancer cell lines                      | hsa-miR-361    | Up |        | Tran et al., 2007    |
| Head and neck cancer cell lines                      | hsa-miR-98     | Up |        | Tran et al., 2007    |
| Breast, colon, lung, pancreas, prostate, and stomach | hsa-let-7a     | Up |        | Volinia et al., 2006 |
| Breast, colon, lung, pancreas, prostate, and stomach | hsa-let-7b     | Up |        | Volinia et al., 2006 |
| Breast, colon, lung, pancreas, prostate, and stomach | hsa-let-7e     | Up |        | Volinia et al., 2006 |
| Colon, pancreas, prostate                            | hsa-miR-106a   | Up | RB1    | Volinia et al., 2006 |
| Colon, pancreas, stomach                             | hsa-miR-107    | Up |        | Volinia et al., 2006 |
| Breast, colon, lung, pancreas, prostate, and stomach | hsa-miR-128a   | Up |        | Volinia et al., 2006 |
| Colon, lung, pancreas                                | hsa-miR-128b   | Up |        | Volinia et al., 2006 |
| Breast, colon, lung, pancreas, prostate, and stomach | hsa-miR-138-1  | Up |        | Volinia et al., 2006 |
| Breast, colon, lung, pancreas, prostate, and stomach | hsa-miR-138-2  | Up |        | Volinia et al., 2006 |
| Breast, pancreas, prostate                           | hsa-miR-146    | Up |        | Volinia et al., 2006 |
| Breast, colon, lung                                  | hsa-miR-155    | Up |        | Volinia et al., 2006 |
| Breast, colon, lung, pancreas, prostate, and stomach | hsa-miR-155    | Up |        | Volinia et al., 2006 |
| Breast, colon, lung, pancreas, prostate              | hsa-miR-17-5p  | Up |        | Volinia et al., 2006 |
| Breast, pancreas, prostate                           | hsa-miR-181b-1 | Up |        | Volinia et al., 2006 |
| Colon, lung, pancreas, prostate, stomach             | hsa-miR-191    | Up |        | Volinia et al., 2006 |
| Lung, pancreas, prostate                             | hsa-miR-199a-1 | Up |        | Volinia et al., 2006 |
| Colon, pancreas, prostate                            | hsa-miR-20a    | Up | TGFBR2 | Volinia et al., 2006 |
| Breast, colon, lung, pancreas, prostate, and stomach | hsa-miR-21     | Up |        | Volinia et al., 2006 |
| Breast, colon, lung, pancreas, prostate, stomach     | hsa-miR-21     | Up |        | Volinia et al., 2006 |
| Breast, colon, lung, pancreas, prostate, and stomach | hsa-miR-212    | Up |        | Volinia et al., 2006 |
| Pancreas, prostate, stomach                          | hsa-miR-214    | Up |        | Volinia et al., 2006 |
| Breast, colon, lung, pancreas, prostate, and stomach | hsa-miR-218-2  | Up |        | Volinia et al., 2006 |
| Colon, pancreas, stomach                             | hsa-miR-221    | Up |        | Volinia et al., 2006 |
| Colon, pancreas, prostate, stomach                   | hsa-miR-223    | Up |        | Volinia et al., 2006 |



|                                                      |               |    |       |                        |
|------------------------------------------------------|---------------|----|-------|------------------------|
| Breast, colon, lung, pancreas, prostate, and stomach | hsa-miR-23b   | Up |       | Volinia et al., 2006   |
| Colon, pancreas, stomach                             | hsa-miR-24-1  | Up |       | Volinia et al., 2006   |
| Colon, pancreas, stomach                             | hsa-miR-24-2  | Up |       | Volinia et al., 2006   |
| Pancreas, prostate, stomach                          | hsa-miR-25    | Up |       | Volinia et al., 2006   |
| Breast, colon, pancreas, prostate                    | hsa-miR-29b-2 | Up |       | Volinia et al., 2006   |
| Colon, pancreas, prostate                            | hsa-miR-30c   | Up |       | Volinia et al., 2006   |
| Breast, colon, lung, pancreas, prostate, and stomach | hsa-miR-30d   | Up |       | Volinia et al., 2006   |
| Colon, pancreas, prostate                            | hsa-miR-32    | Up |       | Volinia et al., 2006   |
| Breast, colon, lung, pancreas, prostate, and stomach | hsa-miR-9-3   | Up |       | Volinia et al., 2006   |
| Breast, colon, lung, pancreas, prostate, and stomach | hsa-miR-92-1  | Up |       | Volinia et al., 2006   |
| Pancreas, prostate, stomach                          | hsa-miR-92-2  | Up |       | Volinia et al., 2006   |
| Breast, colon, lung, pancreas, prostate, and stomach | hsa-miR-96    | Up |       | Volinia et al., 2006   |
| Testicular germ cell tumors                          | hsa-miR-372   | Up | LATS2 | Voorhoeve et al., 2006 |
| Testicular germ cell tumors                          | hsa-miR-373   | Up | LATS2 | Voorhoeve et al., 2006 |
| Ovarian cancer                                       | hsa-miR-210   | Up |       | Yanaihara et al., 2006 |

## References

1. Bandres E, Cubedo E, Agirre X, Malumbres R, Zarate R, Ramirez N, Abajo A, Navarro A, Moreno I, Monzo M *et al*: **Identification by Real-time PCR of 13 mature microRNAs differentially expressed in colorectal cancer and non-tumoral tissues.** *Mol Cancer* 2006, **5**:29.
2. Calin GA, Liu CG, Sevignani C, Ferracin M, Felli N, Dumitru CD, Shimizu M, Cimmino A, Zupo S, Dono M *et al*: **MicroRNA profiling reveals distinct signatures in B cell chronic lymphocytic leukemias.** *Proc Natl Acad Sci U S A* 2004, **101**(32):11755-11760.
3. Chan JA, Krichevsky AM, Kosik KS: **MicroRNA-21 is an antiapoptotic factor in human glioblastoma cells.** *Cancer Res* 2005, **65**(14):6029-6033.
4. Ciafre SA, Galardi S, Mangiola A, Ferracin M, Liu CG, Sabatino G, Negrini M, Maira G, Croce CM, Farace MG: **Extensive modulation of a set of microRNAs in primary glioblastoma.** *Biochem Biophys Res Commun* 2005, **334**(4):1351-1358.
5. Cimmino A, Calin GA, Fabbri M, Iorio MV, Ferracin M, Shimizu M, Wojcik SE, Aqeilan RI, Zupo S, Dono M *et al*: **miR-15 and miR-16 induce apoptosis by targeting BCL2.** *Proc Natl Acad Sci U S A* 2005, **102**(39):13944-13949.
6. Eis PS, Tam W, Sun L, Chadburn A, Li Z, Gomez MF, Lund E, Dahlberg JE: **Accumulation of miR-155 and BIC RNA in human B cell lymphomas.** *Proc Natl Acad Sci U S A* 2005, **102**(10):3627-3632.
7. Esquela-Kerscher A, Slack FJ: **Oncomirs - microRNAs with a role in cancer.** *Nat Rev Cancer* 2006, **6**(4):259-269.
8. Gaur A, Jewell DA, Liang Y, Ridzon D, Moore JH, Chen C, Ambros VR, Israel MA: **Characterization of microRNA expression levels and their biological correlates in human cancer cell lines.** *Cancer Res* 2007, **67**(6):2456-2468.
9. Hayashita Y, Osada H, Tatematsu Y, Yamada H, Yanagisawa K, Tomida S, Yatabe Y, Kawahara K, Sekido Y, Takahashi T: **A polycistronic microRNA cluster, miR-17-92, is overexpressed in human lung cancers and enhances cell proliferation.** *Cancer Res* 2005, **65**(21):9628-9632.
10. He H, Jazdzewski K, Li W, Liyanarachchi S, Nagy R, Volinia S, Calin GA, Liu CG, Franssila K, Suster S *et al*: **The role of microRNA genes in papillary thyroid carcinoma.** *Proc Natl Acad Sci U S A* 2005, **102**(52):19075-19080.

11. He L, Thomson JM, Hemann MT, Hernando-Monge E, Mu D, Goodson S, Powers S, Cordon-Cardo C, Lowe SW, Hannon GJ *et al*: **A microRNA polycistron as a potential human oncogene.** *Nature* 2005, **435**(7043):828-833.
12. Iorio MV, Ferracin M, Liu CG, Veronese A, Spizzo R, Sabbioni S, Magri E, Pedriali M, Fabbri M, Campiglio M *et al*: **MicroRNA gene expression deregulation in human breast cancer.** *Cancer Res* 2005, **65**(16):7065-7070.
13. Johnson SM, Grosshans H, Shingara J, Byrom M, Jarvis R, Cheng A, Labourier E, Reinert KL, Brown D, Slack FJ: **RAS is regulated by the let-7 microRNA family.** *Cell* 2005, **120**(5):635-647.
14. Lu J, Getz G, Miska EA, Alvarez-Saavedra E, Lamb J, Peck D, Sweet-Cordero A, Ebert BL, Mak RH, Ferrando AA *et al*: **MicroRNA expression profiles classify human cancers.** *Nature* 2005, **435**(7043):834-838.
15. Lui WO, Pourmand N, Patterson BK, Fire A: **Patterns of known and novel small RNAs in human cervical cancer.** *Cancer Res* 2007, **67**(13):6031-6043.
16. Meng F, Henson R, Lang M, Wehbe H, Maheshwari S, Mendell JT, Jiang J, Schmittgen TD, Patel T: **Involvement of human micro-RNA in growth and response to chemotherapy in human cholangiocarcinoma cell lines.** *Gastroenterology* 2006, **130**(7):2113-2129.
17. Metzler M, Wilda M, Busch K, Viehmann S, Borkhardt A: **High expression of precursor microRNA-155/BIC RNA in children with Burkitt lymphoma.** *Genes Chromosomes Cancer* 2004, **39**(2):167-169.
18. Michael MZ, SM OC, van Holst Pellekaan NG, Young GP, James RJ: **Reduced accumulation of specific microRNAs in colorectal neoplasia.** *Mol Cancer Res* 2003, **1**(12):882-891.
19. Murakami Y, Yasuda T, Saigo K, Urashima T, Toyoda H, Okanoue T, Shimotohno K: **Comprehensive analysis of microRNA expression patterns in hepatocellular carcinoma and non-tumorous tissues.** *Oncogene* 2006, **25**(17):2537-2545.
20. O'Donnell KA, Wentzel EA, Zeller KI, Dang CV, Mendell JT: **c-Myc-regulated microRNAs modulate E2F1 expression.** *Nature* 2005, **435**(7043):839-843.
21. O'Rourke JR, Swanson MS, Harfe BD: **MicroRNAs in mammalian development and tumorigenesis.** *Birth Defects Res C Embryo Today* 2006, **78**(2):172-179.
22. Pallante P, Visone R, Ferracin M, Ferraro A, Berlingieri MT, Troncone G, Chiappetta G, Liu CG, Santoro M, Negrini M *et al*: **MicroRNA deregulation in human thyroid papillary carcinomas.** *Endocr Relat Cancer* 2006, **13**(2):497-508.
23. Porkka KP, Pfeiffer MJ, Waltering KK, Vessella RL, Tammela TL, Visakorpi T: **MicroRNA expression profiling in prostate cancer.** *Cancer Res* 2007, **67**(13):6130-6135.
24. Takamizawa J, Konishi H, Yanagisawa K, Tomida S, Osada H, Endoh H, Harano T, Yatabe Y, Nagino M, Nimura Y *et al*: **Reduced expression of the let-7 microRNAs in human lung cancers in association with shortened postoperative survival.** *Cancer Res* 2004, **64**(11):3753-3756.
25. Tran N, McLean T, Zhang X, Zhao CJ, Thomson JM, O'Brien C, Rose B: **MicroRNA expression profiles in head and neck cancer cell lines.** *Biochem Biophys Res Commun* 2007, **358**(1):12-17.
26. Volinia S, Calin GA, Liu CG, Ambs S, Cimmino A, Petrocca F, Visone R, Iorio M, Roldo C, Ferracin M *et al*: **A microRNA expression signature of human solid tumors defines cancer gene targets.** *Proc Natl Acad Sci U S A* 2006, **103**(7):2257-2261.

27. Voorhoeve PM, le Sage C, Schrier M, Gillis AJ, Stoop H, Nagel R, Liu YP, van Duijse J, Drost J, Griekspoor A *et al* : **A genetic screen implicates miRNA-372 and miRNA-373 as oncogenes in testicular germ cell tumors.** *Cell* 2006, **124**(6):1169-1181.
28. Yanaihara N, Caplen N, Bowman E, Seike M, Kumamoto K, Yi M, Stephens RM, Okamoto A, Yokota J, Tanaka T *et al* : **Unique microRNA molecular profiles in lung cancer diagnosis and prognosis.** *Cancer Cell* 2006, **9**(3):189-198.
